# Supplementary material for: Expression, prognostic value and mechanism of SP100 family in pancreatic adenocarcinoma
Source: publisher site journal article supplement (doi:10.18632/aging.204811), 2023-06-22
Supplement: Supplementary file [file aging-v15i12-204811-supplementary-material-SD1.pdf]

**SUPPLEMENTARY FIGURES**

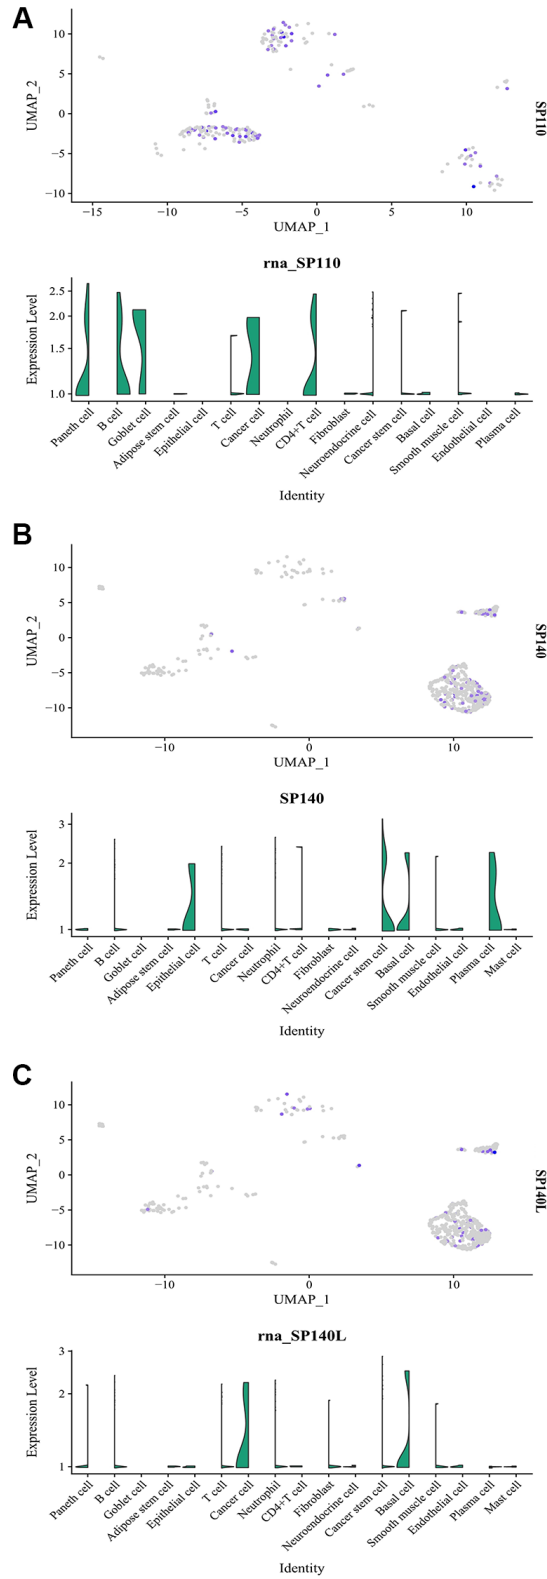

**Supplementary Figure 1. Expression characteristics of SP110/SP140/SP140L at the single-cell level in PAAD. (A) The single-cell level of SP110; (B) The single-cell level of SP140; (C) The single-cell level of SP140L.**

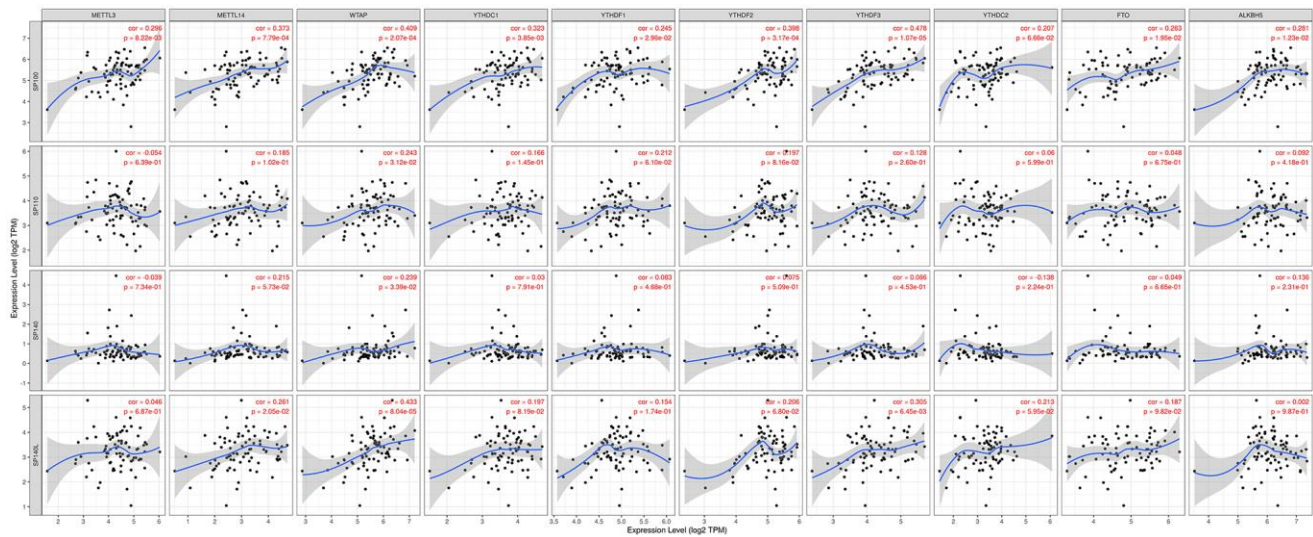

**Supplementary Figure 2.** SP100 family members were positively correlated with the expression levels of most M6A methylation regulators.

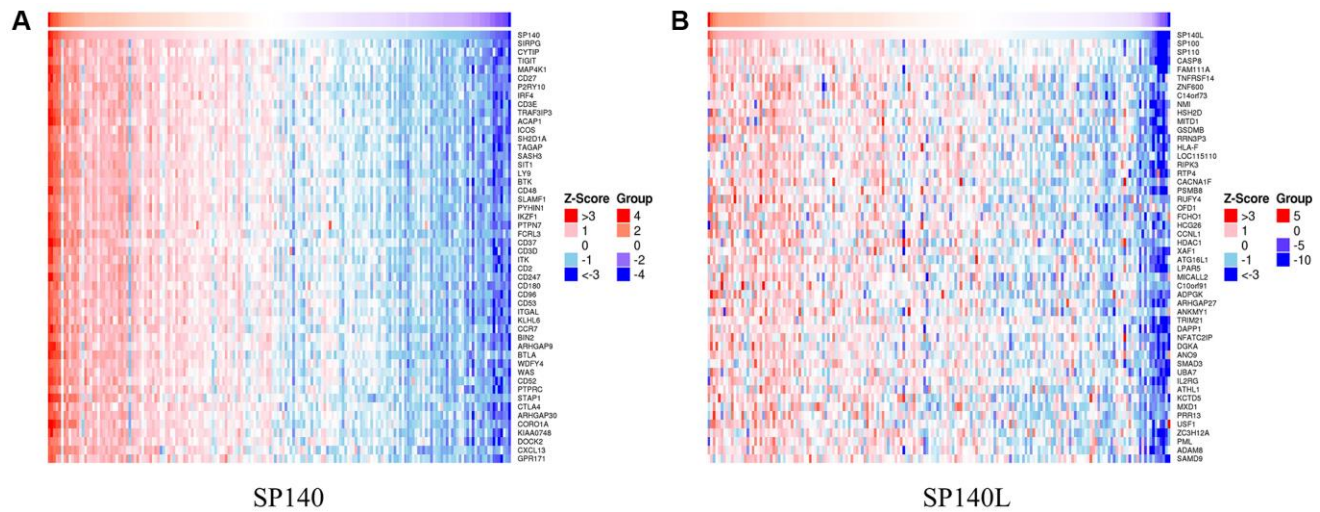

**Supplementary Figure 3.** Top 50 genes co-expressed with SP140/SP140L. (A) Top 50 genes co-expressed with SP140; (B) Top 50 genes co-expressed with SP140L.

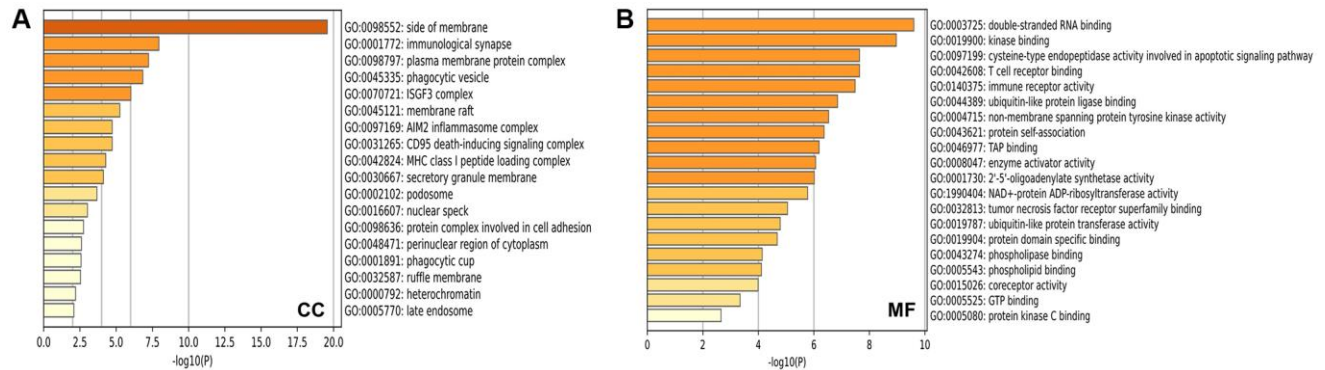

**Supplementary Figure 4.** The GO enrichment of the CC terms and MF terms of the SP100 family and its 400 co-expressed genes. (A) CC terms; (B) MF terms.
