# Supplementary material for: Expression, prognostic value and mechanism of SP100 family in pancreatic adenocarcinoma
Source: publisher site journal article supplement (doi:10.18632/aging.204811), 2023-06-22
Supplement: Supplementary file [file aging-v15i12-204811-supplementary-material-SD9.pdf]

**Supplementary Table 8. Functional intensity scoring of 24 interacting genes.**

| <b>Gene</b> | <b>Degree</b> | <b>Number of undirected edges</b> | <b>Topological Coefficient</b> | <b>Radiality</b> |
|-------------|---------------|-----------------------------------|--------------------------------|------------------|
| TP53        | 17            | 17                                | 0.419786096                    | 0.98209719       |
| UBE2I       | 16            | 16                                | 0.413043478                    | 0.98209719       |
| SUMO1       | 15            | 15                                | 0.434782609                    | 0.97953964       |
| SP100       | 14            | 14                                | 0.444805195                    | 0.9769821        |
| SUMO2       | 14            | 14                                | 0.450310559                    | 0.9769821        |
| PIAS1       | 11            | 11                                | 0.508264463                    | 0.96675192       |
| HSPA4       | 11            | 11                                | 0.450413223                    | 0.96675192       |
| PML         | 11            | 11                                | 0.505928854                    | 0.96930946       |
| DAXX        | 10            | 10                                | 0.519047619                    | 0.96419437       |
| RANBP2      | 10            | 10                                | 0.559090909                    | 0.96419437       |
| STUB1       | 8             | 8                                 | 0.428571429                    | 0.95907928       |
| NUP210      | 8             | 8                                 | 0.541666667                    | 0.95907928       |
| UBE3A       | 7             | 7                                 | 0.571428571                    | 0.95396419       |
| DNAJB1      | 6             | 6                                 | 0.5                            | 0.94884911       |
| SIRT1       | 6             | 6                                 | 0.625                          | 0.94884911       |
| UBA2        | 6             | 6                                 | 0.715686275                    | 0.94117647       |
| AURKA       | 5             | 5                                 | 0.673684211                    | 0.94373402       |
| RPA1        | 5             | 5                                 | 0.705263158                    | 0.94373402       |
| DDX5        | 5             | 5                                 | 0.768421053                    | 0.94373402       |
| CLPP        | 4             | 4                                 | 0.573529412                    | 0.93606138       |
| H3F3B       | 3             | 3                                 | 0.650793651                    | 0.94373402       |
| SP110       | 2             | 2                                 | 0.714285714                    | 0.92838875       |
| SP140L      | 1             | 1                                 | 0                              | 0.90792839       |
| SP140       | 1             | 1                                 | 0                              | 0.9028133        |
