# Supplementary material for: Expression, prognostic value and mechanism of SP100 family in pancreatic adenocarcinoma
Source: Aging (Albany NY). 2023 Jun 22;15(12):5569–91. doi: 10.18632/aging.204811 (PMC10333092; doi:10.18632/aging.204811)
Supplement: Supplementary Table 1 [file aging-15-204811-s002.xlsx]

## Sheet: Sheet1
Supplementary Table 1. Baseline characteristics of PAAD patients in the TCGA database.
case_submitter_id	age_at_index	days_to_birth	days_to_death	ethnicity	gender	race	vital_status	year_of_birth	age_at_diagnosis	ajcc_pathologic_m	ajcc_pathologic_n	ajcc_pathologic_stage	ajcc_pathologic_t	ajcc_staging_system_edition	classification_of_tumor	days_to_diagnosis	days_to_last_follow_up	last_known_disease_status	morphology	primary_diagnosis	prior_malignancy	prior_treatment	progression_or_recurrence	site_of_resection_or_biopsy	synchronous_malignancy	tissue_or_organ_of_origin	tumor_grade	year_of_diagnosis	treatment_or_therapy	treatment_type	alcohol_history	cigarettes_per_day	pack_years_smoked	years_smoked
TCGA-RB-A7B8	81	-29585	466	not hispanic or latino	female	white	Dead	1932	29585	MX	N1	Stage IIB	T3	7th	not reported	0	36	not reported	8255-03-01	Adenocarcinoma with mixed subtypes	no	No	not reported	Head of pancreas	No	Head of pancreas	not reported	2013	no	Radiation Therapy, NOS	Yes	'--	'--	'--
TCGA-RB-A7B8	81	-29585	466	not hispanic or latino	female	white	Dead	1932	29585	MX	N1	Stage IIB	T3	7th	not reported	0	36	not reported	8255-03-01	Adenocarcinoma with mixed subtypes	no	No	not reported	Head of pancreas	No	Head of pancreas	not reported	2013	yes	Pharmaceutical Therapy, NOS	Yes	'--	'--	'--
TCGA-HV-A7OP	72	-26322	'--	not reported	male	asian	Alive	1940	26322	M0	N1	Stage IIB	T3	7th	not reported	0	978	not reported	8500-03-01	Infiltrating duct carcinoma, NOS	no	No	not reported	Head of pancreas	No	Head of pancreas	not reported	2012	yes	Radiation Therapy, NOS	Yes	3.28767	60	'--
TCGA-HV-A7OP	72	-26322	'--	not reported	male	asian	Alive	1940	26322	M0	N1	Stage IIB	T3	7th	not reported	0	978	not reported	8500-03-01	Infiltrating duct carcinoma, NOS	no	No	not reported	Head of pancreas	No	Head of pancreas	not reported	2012	yes	Pharmaceutical Therapy, NOS	No	1.36986	25	30
TCGA-F2-A8YN	76	-28047	'--	not hispanic or latino	male	white	Alive	1937	28047	M0	N0	Stage IIA	T3	7th	not reported	0	517	not reported	8500-03-01	Infiltrating duct carcinoma, NOS	no	No	not reported	Head of pancreas	No	Head of pancreas	not reported	2013	no	Radiation Therapy, NOS	No	'--	'--	'--
TCGA-F2-A8YN	76	-28047	'--	not hispanic or latino	male	white	Alive	1937	28047	M0	N0	Stage IIA	T3	7th	not reported	0	517	not reported	8500-03-01	Infiltrating duct carcinoma, NOS	no	No	not reported	Head of pancreas	No	Head of pancreas	not reported	2013	yes	Pharmaceutical Therapy, NOS	No	'--	'--	'--
TCGA-3A-A9IJ	65	-23791	'--	not hispanic or latino	male	white	Alive	1944	23791	MX	N0	Stage IB	T2	6th	not reported	0	1854	not reported	8246-03-01	Neuroendocrine carcinoma, NOS	yes	No	not reported	Head of pancreas	No	Head of pancreas	not reported	2009	no	Pharmaceutical Therapy, NOS	Yes	'--	'--	'--
TCGA-3A-A9IJ	65	-23791	'--	not hispanic or latino	male	white	Alive	1944	23791	MX	N0	Stage IB	T2	6th	not reported	0	1854	not reported	8246-03-01	Neuroendocrine carcinoma, NOS	yes	No	not reported	Head of pancreas	No	Head of pancreas	not reported	2009	no	Radiation Therapy, NOS	No	'--	'--	'--
TCGA-HZ-8638	84	-30821	151	not hispanic or latino	female	white	Dead	1928	30821	MX	N0	Stage IA	T1	7th	not reported	0	91	not reported	8480-03-01	Mucinous adenocarcinoma	no	No	not reported	Head of pancreas	No	Head of pancreas	not reported	2012	no	Radiation Therapy, NOS	Yes	'--	'--	'--
TCGA-HZ-8638	84	-30821	151	not hispanic or latino	female	white	Dead	1928	30821	MX	N0	Stage IA	T1	7th	not reported	0	91	not reported	8480-03-01	Mucinous adenocarcinoma	no	No	not reported	Head of pancreas	No	Head of pancreas	not reported	2012	no	Pharmaceutical Therapy, NOS	Yes	'--	'--	'--
TCGA-HZ-7918	72	-26573	'--	not hispanic or latino	male	white	Alive	1939	26573	M0	N1	Stage IIB	T3	7th	not reported	0	969	not reported	8500-03-01	Infiltrating duct carcinoma, NOS	no	No	not reported	Head of pancreas	No	Head of pancreas	not reported	2011	yes	Radiation Therapy, NOS	Not Reported	'--	'--	'--
TCGA-HZ-7918	72	-26573	'--	not hispanic or latino	male	white	Alive	1939	26573	M0	N1	Stage IIB	T3	7th	not reported	0	969	not reported	8500-03-01	Infiltrating duct carcinoma, NOS	no	No	not reported	Head of pancreas	No	Head of pancreas	not reported	2011	yes	Pharmaceutical Therapy, NOS	Yes	2.19178	40	65
TCGA-IB-AAUN	74	-27128	144	not hispanic or latino	female	white	Dead	1939	27128	M0	N0	Stage IB	T2	7th	not reported	0	'--	not reported	8500-03-01	Infiltrating duct carcinoma, NOS	no	No	not reported	Head of pancreas	No	Head of pancreas	not reported	2013	no	Radiation Therapy, NOS	Yes	2.73973	50	'--
TCGA-IB-AAUN	74	-27128	144	not hispanic or latino	female	white	Dead	1939	27128	M0	N0	Stage IB	T2	7th	not reported	0	'--	not reported	8500-03-01	Infiltrating duct carcinoma, NOS	no	No	not reported	Head of pancreas	No	Head of pancreas	not reported	2013	no	Pharmaceutical Therapy, NOS	Yes	2.84932	52	52
TCGA-IB-7654	80	-29292	476	not hispanic or latino	male	white	Dead	1928	29292	M0	N1	Stage IIB	T2	7th	not reported	0	'--	not reported	8500-03-01	Infiltrating duct carcinoma, NOS	yes	Yes	not reported	Head of pancreas	No	Head of pancreas	not reported	2008	no	Radiation Therapy, NOS	Not Reported	'--	'--	'--
TCGA-IB-7654	80	-29292	476	not hispanic or latino	male	white	Dead	1928	29292	M0	N1	Stage IIB	T2	7th	not reported	0	'--	not reported	8500-03-01	Infiltrating duct carcinoma, NOS	yes	Yes	not reported	Head of pancreas	No	Head of pancreas	not reported	2008	no	Pharmaceutical Therapy, NOS	No	'--	'--	'--
TCGA-IB-AAUR	67	-24576	'--	not hispanic or latino	male	white	Alive	1946	24576	M0	N1	Stage IIB	T3	7th	not reported	0	338	not reported	8500-03-01	Infiltrating duct carcinoma, NOS	no	No	not reported	Head of pancreas	No	Head of pancreas	not reported	2013	no	Radiation Therapy, NOS	No	'--	'--	'--
TCGA-IB-AAUR	67	-24576	'--	not hispanic or latino	male	white	Alive	1946	24576	M0	N1	Stage IIB	T3	7th	not reported	0	338	not reported	8500-03-01	Infiltrating duct carcinoma, NOS	no	No	not reported	Head of pancreas	No	Head of pancreas	not reported	2013	no	Pharmaceutical Therapy, NOS	No	'--	'--	'--
TCGA-3A-A9IC	61	-22400	738	not hispanic or latino	female	white	Dead	1950	22400	MX	N1	Stage IIB	T3	7th	not reported	0	'--	not reported	8500-03-01	Infiltrating duct carcinoma, NOS	no	No	not reported	Head of pancreas	No	Head of pancreas	not reported	2011	yes	Radiation Therapy, NOS	No	'--	'--	'--
TCGA-3A-A9IC	61	-22400	738	not hispanic or latino	female	white	Dead	1950	22400	MX	N1	Stage IIB	T3	7th	not reported	0	'--	not reported	8500-03-01	Infiltrating duct carcinoma, NOS	no	No	not reported	Head of pancreas	No	Head of pancreas	not reported	2011	yes	Pharmaceutical Therapy, NOS	Yes	'--	'--	'--
TCGA-HZ-8003	65	-23868	596	not hispanic or latino	female	white	Dead	1946	23868	MX	N1	Stage IIB	T3	7th	not reported	0	21	not reported	8500-03-01	Infiltrating duct carcinoma, NOS	no	No	not reported	Head of pancreas	No	Head of pancreas	not reported	2011	yes	Pharmaceutical Therapy, NOS	Yes	'--	'--	'--
TCGA-HZ-8003	65	-23868	596	not hispanic or latino	female	white	Dead	1946	23868	MX	N1	Stage IIB	T3	7th	not reported	0	21	not reported	8500-03-01	Infiltrating duct carcinoma, NOS	no	No	not reported	Head of pancreas	No	Head of pancreas	not reported	2011	no	Radiation Therapy, NOS	Yes	'--	'--	'--
TCGA-IB-AAUS	84	-30684	'--	not hispanic or latino	female	white	Alive	1929	30684	M0	N1	Stage IIB	T3	7th	not reported	0	225	not reported	8500-03-01	Infiltrating duct carcinoma, NOS	no	No	not reported	Head of pancreas	No	Head of pancreas	not reported	2013	yes	Pharmaceutical Therapy, NOS	Not Reported	'--	'--	'--
TCGA-IB-AAUS	84	-30684	'--	not hispanic or latino	female	white	Alive	1929	30684	M0	N1	Stage IIB	T3	7th	not reported	0	225	not reported	8500-03-01	Infiltrating duct carcinoma, NOS	no	No	not reported	Head of pancreas	No	Head of pancreas	not reported	2013	no	Radiation Therapy, NOS	Yes	'--	'--	'--
TCGA-IB-AAUV	49	-18059	'--	not hispanic or latino	male	white	Alive	1964	18059	M0	N1	Stage IIB	T3	7th	not reported	0	404	not reported	8500-03-01	Infiltrating duct carcinoma, NOS	no	No	not reported	Head of pancreas	No	Head of pancreas	not reported	2013	no	Radiation Therapy, NOS	Yes	1.36986	25	26
TCGA-IB-AAUV	49	-18059	'--	not hispanic or latino	male	white	Alive	1964	18059	M0	N1	Stage IIB	T3	7th	not reported	0	404	not reported	8500-03-01	Infiltrating duct carcinoma, NOS	no	No	not reported	Head of pancreas	No	Head of pancreas	not reported	2013	yes	Pharmaceutical Therapy, NOS	Yes	0.0547945	1	'--
TCGA-IB-A7M4	81	-29792	'--	not hispanic or latino	male	white	Alive	1932	29792	MX	N1	Stage IIB	T3	7th	not reported	0	483	not reported	8500-03-01	Infiltrating duct carcinoma, NOS	no	No	not reported	Body of pancreas	No	Body of pancreas	not reported	2013	no	Radiation Therapy, NOS	Yes	1.09589	20	20
TCGA-IB-A7M4	81	-29792	'--	not hispanic or latino	male	white	Alive	1932	29792	MX	N1	Stage IIB	T3	7th	not reported	0	483	not reported	8500-03-01	Infiltrating duct carcinoma, NOS	no	No	not reported	Body of pancreas	No	Body of pancreas	not reported	2013	no	Pharmaceutical Therapy, NOS	Not Reported	'--	'--	'--
TCGA-Z5-AAPL	74	-27152	'--	not hispanic or latino	female	white	Alive	1939	27152	M0	N0	Stage IIA	T3	7th	not reported	0	467	not reported	8500-03-01	Infiltrating duct carcinoma, NOS	no	No	not reported	Pancreas, NOS	No	Pancreas, NOS	not reported	2013	yes	Pharmaceutical Therapy, NOS	Yes	0.191781	3.5	7
TCGA-Z5-AAPL	74	-27152	'--	not hispanic or latino	female	white	Alive	1939	27152	M0	N0	Stage IIA	T3	7th	not reported	0	467	not reported	8500-03-01	Infiltrating duct carcinoma, NOS	no	No	not reported	Pancreas, NOS	No	Pancreas, NOS	not reported	2013	no	Radiation Therapy, NOS	Not Reported	'--	'--	'--
TCGA-IB-A5ST	64	-23672	'--	not hispanic or latino	female	white	Alive	1948	23672	M0	N1	Stage IIB	T3	7th	not reported	0	635	not reported	8500-03-01	Infiltrating duct carcinoma, NOS	no	No	not reported	Head of pancreas	No	Head of pancreas	not reported	2012	no	Radiation Therapy, NOS	No	'--	'--	'--
TCGA-IB-A5ST	64	-23672	'--	not hispanic or latino	female	white	Alive	1948	23672	M0	N1	Stage IIB	T3	7th	not reported	0	635	not reported	8500-03-01	Infiltrating duct carcinoma, NOS	no	No	not reported	Head of pancreas	No	Head of pancreas	not reported	2012	no	Pharmaceutical Therapy, NOS	Yes	'--	'--	'--
TCGA-HZ-7922	61	-22413	'--	not hispanic or latino	female	white	Alive	1950	22413	MX	N1	Stage IIB	T3	7th	not reported	0	4	not reported	8500-03-01	Infiltrating duct carcinoma, NOS	no	No	not reported	Head of pancreas	No	Head of pancreas	not reported	2011	not reported	Pharmaceutical Therapy, NOS	Yes	'--	'--	'--
TCGA-HZ-7922	61	-22413	'--	not hispanic or latino	female	white	Alive	1950	22413	MX	N1	Stage IIB	T3	7th	not reported	0	4	not reported	8500-03-01	Infiltrating duct carcinoma, NOS	no	No	not reported	Head of pancreas	No	Head of pancreas	not reported	2011	not reported	Radiation Therapy, NOS	Yes	0.410959	7.5	5
TCGA-2J-AAB6	75	-27600	293	not reported	male	white	Dead	1937	27600	M0	N0	Stage IIA	T3	7th	not reported	0	'--	not reported	8500-03-01	Infiltrating duct carcinoma, NOS	no	No	not reported	Body of pancreas	No	Body of pancreas	not reported	2012	yes	Pharmaceutical Therapy, NOS	Yes	0.821918	15	15
TCGA-2J-AAB6	75	-27600	293	not reported	male	white	Dead	1937	27600	M0	N0	Stage IIA	T3	7th	not reported	0	'--	not reported	8500-03-01	Infiltrating duct carcinoma, NOS	no	No	not reported	Body of pancreas	No	Body of pancreas	not reported	2012	no	Radiation Therapy, NOS	Yes	'--	'--	'--
TCGA-HZ-8519	73	-26947	'--	not hispanic or latino	male	white	Alive	1939	26947	MX	N0	Stage IA	T1	7th	not reported	0	454	not reported	8140-03-01	Adenocarcinoma, NOS	no	No	not reported	Head of pancreas	No	Head of pancreas	not reported	2012	yes	Pharmaceutical Therapy, NOS	Yes	1.64384	30	'--
TCGA-HZ-8519	73	-26947	'--	not hispanic or latino	male	white	Alive	1939	26947	MX	N0	Stage IA	T1	7th	not reported	0	454	not reported	8140-03-01	Adenocarcinoma, NOS	no	No	not reported	Head of pancreas	No	Head of pancreas	not reported	2012	yes	Radiation Therapy, NOS	Yes	1.36986	25	25
TCGA-FB-AAPU	41	-15129	381	not hispanic or latino	female	asian	Dead	1967	15129	MX	N0	Stage IIA	T3	7th	not reported	0	'--	not reported	8500-03-01	Infiltrating duct carcinoma, NOS	no	No	not reported	Head of pancreas	No	Head of pancreas	not reported	2008	no	Radiation Therapy, NOS	No	'--	'--	'--
TCGA-FB-AAPU	41	-15129	381	not hispanic or latino	female	asian	Dead	1967	15129	MX	N0	Stage IIA	T3	7th	not reported	0	'--	not reported	8500-03-01	Infiltrating duct carcinoma, NOS	no	No	not reported	Head of pancreas	No	Head of pancreas	not reported	2008	no	Pharmaceutical Therapy, NOS	Yes	1.36986	25	25
TCGA-IB-A7LX	57	-20898	250	not hispanic or latino	male	white	Dead	1955	20898	MX	N1	Stage IIB	T3	7th	not reported	0	'--	not reported	8500-03-01	Infiltrating duct carcinoma, NOS	no	No	not reported	Head of pancreas	No	Head of pancreas	not reported	2012	yes	Pharmaceutical Therapy, NOS	Yes	0.126027	2.3	22
TCGA-IB-A7LX	57	-20898	250	not hispanic or latino	male	white	Dead	1955	20898	MX	N1	Stage IIB	T3	7th	not reported	0	'--	not reported	8500-03-01	Infiltrating duct carcinoma, NOS	no	No	not reported	Head of pancreas	No	Head of pancreas	not reported	2012	no	Radiation Therapy, NOS	Yes	1.09589	20	20
TCGA-2L-AAQM	52	-19315	'--	not reported	male	white	Alive	1958	19315	MX	N1	Stage IIB	T3	7th	not reported	0	1383	not reported	8246-03-01	Neuroendocrine carcinoma, NOS	no	No	not reported	Pancreas, NOS	No	Pancreas, NOS	not reported	2010	no	Pharmaceutical Therapy, NOS	No	'--	'--	'--
TCGA-2L-AAQM	52	-19315	'--	not reported	male	white	Alive	1958	19315	MX	N1	Stage IIB	T3	7th	not reported	0	1383	not reported	8246-03-01	Neuroendocrine carcinoma, NOS	no	No	not reported	Pancreas, NOS	No	Pancreas, NOS	not reported	2010	no	Radiation Therapy, NOS	Yes	'--	'--	'--
TCGA-FZ-5926	73	-26881	541	not hispanic or latino	female	white	Dead	1928	26881	M0	N1	Stage III	T3	5th	not reported	0	'--	not reported	8500-03-01	Infiltrating duct carcinoma, NOS	no	No	not reported	Head of pancreas	No	Head of pancreas	not reported	2001	no	Pharmaceutical Therapy, NOS	Not Reported	'--	'--	'--
TCGA-FZ-5926	73	-26881	541	not hispanic or latino	female	white	Dead	1928	26881	M0	N1	Stage III	T3	5th	not reported	0	'--	not reported	8500-03-01	Infiltrating duct carcinoma, NOS	no	No	not reported	Head of pancreas	No	Head of pancreas	not reported	2001	no	Radiation Therapy, NOS	Yes	'--	'--	'--
TCGA-US-A77G	64	-23443	12	not hispanic or latino	male	white	Dead	1946	23443	MX	N1	Stage IIB	T3	7th	not reported	0	'--	not reported	8500-03-01	Infiltrating duct carcinoma, NOS	no	No	not reported	Head of pancreas	No	Head of pancreas	not reported	2010	no	Radiation Therapy, NOS	Not Reported	'--	'--	'--
TCGA-US-A77G	64	-23443	12	not hispanic or latino	male	white	Dead	1946	23443	MX	N1	Stage IIB	T3	7th	not reported	0	'--	not reported	8500-03-01	Infiltrating duct carcinoma, NOS	no	No	not reported	Head of pancreas	No	Head of pancreas	not reported	2010	no	Pharmaceutical Therapy, NOS	Yes	'--	'--	'--
TCGA-2J-AAB1	65	-23962	66	not reported	male	white	Dead	1947	23962	M0	N1	Stage IIB	T3	7th	not reported	0	'--	not reported	8480-03-01	Mucinous adenocarcinoma	no	No	not reported	Head of pancreas	No	Head of pancreas	not reported	2012	no	Radiation Therapy, NOS	No	'--	'--	'--
TCGA-2J-AAB1	65	-23962	66	not reported	male	white	Dead	1947	23962	M0	N1	Stage IIB	T3	7th	not reported	0	'--	not reported	8480-03-01	Mucinous adenocarcinoma	no	No	not reported	Head of pancreas	No	Head of pancreas	not reported	2012	yes	Pharmaceutical Therapy, NOS	No	'--	'--	'--
TCGA-H6-A45N	88	-32475	397	not hispanic or latino	female	white	Dead	1924	32475	MX	N1	Stage IIB	T3	7th	not reported	0	233	not reported	8140-03-01	Adenocarcinoma, NOS	yes	No	not reported	Tail of pancreas	No	Tail of pancreas	not reported	2012	no	Pharmaceutical Therapy, NOS	Yes	'--	'--	'--
TCGA-H6-A45N	88	-32475	397	not hispanic or latino	female	white	Dead	1924	32475	MX	N1	Stage IIB	T3	7th	not reported	0	233	not reported	8140-03-01	Adenocarcinoma, NOS	yes	No	not reported	Tail of pancreas	No	Tail of pancreas	not reported	2012	no	Radiation Therapy, NOS	Not Reported	'--	'--	'--
TCGA-IB-7885	78	-28554	'--	not hispanic or latino	female	white	Alive	1932	28554	M0	N1	Stage IIB	T3	7th	not reported	0	1257	not reported	8500-03-01	Infiltrating duct carcinoma, NOS	no	No	not reported	Pancreas, NOS	No	Pancreas, NOS	not reported	2010	no	Radiation Therapy, NOS	Yes	0.821918	15	'--
TCGA-IB-7885	78	-28554	'--	not hispanic or latino	female	white	Alive	1932	28554	M0	N1	Stage IIB	T3	7th	not reported	0	1257	not reported	8500-03-01	Infiltrating duct carcinoma, NOS	no	No	not reported	Pancreas, NOS	No	Pancreas, NOS	not reported	2010	yes	Pharmaceutical Therapy, NOS	Yes	'--	'--	'--
TCGA-IB-7645	44	-16126	1502	not reported	female	not reported	Dead	1963	16126	M0	N1	Stage IIB	T3	6th	not reported	0	'--	not reported	8500-03-01	Infiltrating duct carcinoma, NOS	no	No	not reported	Head of pancreas	No	Head of pancreas	not reported	2007	yes	Pharmaceutical Therapy, NOS	Yes	'--	'--	'--
TCGA-IB-7645	44	-16126	1502	not reported	female	not reported	Dead	1963	16126	M0	N1	Stage IIB	T3	6th	not reported	0	'--	not reported	8500-03-01	Infiltrating duct carcinoma, NOS	no	No	not reported	Head of pancreas	No	Head of pancreas	not reported	2007	no	Radiation Therapy, NOS	No	0.410959	7.5	10
TCGA-H6-8124	56	-20741	'--	not hispanic or latino	female	white	Alive	1955	20741	M0	N1	Stage IIB	T3	7th	not reported	0	392	not reported	8140-03-01	Adenocarcinoma, NOS	no	No	not reported	Head of pancreas	No	Head of pancreas	not reported	2011	yes	Pharmaceutical Therapy, NOS	Yes	'--	'--	'--
TCGA-H6-8124	56	-20741	'--	not hispanic or latino	female	white	Alive	1955	20741	M0	N1	Stage IIB	T3	7th	not reported	0	392	not reported	8140-03-01	Adenocarcinoma, NOS	no	No	not reported	Head of pancreas	No	Head of pancreas	not reported	2011	yes	Radiation Therapy, NOS	Yes	'--	'--	'--
TCGA-FZ-5923	71	-26216	619	not hispanic or latino	male	white	Dead	1937	26216	M1	N1	Stage IV	T4	6th	not reported	0	'--	not reported	8500-03-01	Infiltrating duct carcinoma, NOS	no	No	not reported	Head of pancreas	No	Head of pancreas	not reported	2008	no	Radiation Therapy, NOS	No	'--	'--	'--
TCGA-FZ-5923	71	-26216	619	not hispanic or latino	male	white	Dead	1937	26216	M1	N1	Stage IV	T4	6th	not reported	0	'--	not reported	8500-03-01	Infiltrating duct carcinoma, NOS	no	No	not reported	Head of pancreas	No	Head of pancreas	not reported	2008	yes	Pharmaceutical Therapy, NOS	Yes	3.78082	69	23
TCGA-FB-AAQ0	68	-24988	473	not hispanic or latino	male	white	Dead	1943	24988	MX	N0	Stage IIA	T3	7th	not reported	0	'--	not reported	8500-03-01	Infiltrating duct carcinoma, NOS	no	No	not reported	Head of pancreas	No	Head of pancreas	not reported	2011	no	Radiation Therapy, NOS	No	'--	'--	'--
TCGA-FB-AAQ0	68	-24988	473	not hispanic or latino	male	white	Dead	1943	24988	MX	N0	Stage IIA	T3	7th	not reported	0	'--	not reported	8500-03-01	Infiltrating duct carcinoma, NOS	no	No	not reported	Head of pancreas	No	Head of pancreas	not reported	2011	no	Pharmaceutical Therapy, NOS	No	2.19178	40	40
TCGA-FB-AAQ6	85	-31319	244	not hispanic or latino	male	white	Dead	1926	31319	MX	N0	Stage IA	T1	7th	not reported	0	'--	not reported	8500-03-01	Infiltrating duct carcinoma, NOS	yes	No	not reported	Tail of pancreas	No	Tail of pancreas	not reported	2011	no	Radiation Therapy, NOS	Yes	'--	'--	'--
TCGA-FB-AAQ6	85	-31319	244	not hispanic or latino	male	white	Dead	1926	31319	MX	N0	Stage IA	T1	7th	not reported	0	'--	not reported	8500-03-01	Infiltrating duct carcinoma, NOS	yes	No	not reported	Tail of pancreas	No	Tail of pancreas	not reported	2011	yes	Pharmaceutical Therapy, NOS	No	'--	'--	'--
TCGA-IB-AAUO	64	-23622	239	not hispanic or latino	female	white	Dead	1949	23622	M0	N1	Stage IIB	T3	7th	not reported	0	'--	not reported	8500-03-01	Infiltrating duct carcinoma, NOS	no	No	not reported	Head of pancreas	No	Head of pancreas	not reported	2013	yes	Pharmaceutical Therapy, NOS	No	0.821918	15	15
TCGA-IB-AAUO	64	-23622	239	not hispanic or latino	female	white	Dead	1949	23622	M0	N1	Stage IIB	T3	7th	not reported	0	'--	not reported	8500-03-01	Infiltrating duct carcinoma, NOS	no	No	not reported	Head of pancreas	No	Head of pancreas	not reported	2013	no	Radiation Therapy, NOS	Yes	'--	'--	'--
TCGA-2J-AABF	73	-26936	691	not reported	male	white	Dead	1939	26936	M0	N1	Stage IIB	T3	7th	not reported	0	'--	not reported	8500-03-01	Infiltrating duct carcinoma, NOS	no	No	not reported	Head of pancreas	No	Head of pancreas	not reported	2012	yes	Pharmaceutical Therapy, NOS	No	'--	'--	'--
TCGA-2J-AABF	73	-26936	691	not reported	male	white	Dead	1939	26936	M0	N1	Stage IIB	T3	7th	not reported	0	'--	not reported	8500-03-01	Infiltrating duct carcinoma, NOS	no	No	not reported	Head of pancreas	No	Head of pancreas	not reported	2012	yes	Radiation Therapy, NOS	Not Reported	'--	'--	'--
TCGA-IB-AAUT	65	-23801	'--	not hispanic or latino	male	white	Alive	1948	23801	M0	N1	Stage IIB	T2	7th	not reported	0	287	not reported	8480-03-01	Mucinous adenocarcinoma	no	No	not reported	Head of pancreas	No	Head of pancreas	not reported	2013	yes	Pharmaceutical Therapy, NOS	No	'--	'--	'--
TCGA-IB-AAUT	65	-23801	'--	not hispanic or latino	male	white	Alive	1948	23801	M0	N1	Stage IIB	T2	7th	not reported	0	287	not reported	8480-03-01	Mucinous adenocarcinoma	no	No	not reported	Head of pancreas	No	Head of pancreas	not reported	2013	no	Radiation Therapy, NOS	Yes	'--	'--	'--
TCGA-F2-6879	57	-20984	334	not reported	male	white	Dead	1952	20984	M0	N1	Stage IIB	T3	6th	not reported	0	'--	not reported	8140-03-01	Adenocarcinoma, NOS	no	No	not reported	Head of pancreas	No	Head of pancreas	not reported	2009	yes	Pharmaceutical Therapy, NOS	Yes	0.821918	15	'--
TCGA-F2-6879	57	-20984	334	not reported	male	white	Dead	1952	20984	M0	N1	Stage IIB	T3	6th	not reported	0	'--	not reported	8140-03-01	Adenocarcinoma, NOS	no	No	not reported	Head of pancreas	No	Head of pancreas	not reported	2009	no	Radiation Therapy, NOS	No	'--	'--	'--
TCGA-2L-AAQE	56	-20618	684	not reported	male	white	Dead	1955	20618	M0	N1	Stage IIB	T3	7th	not reported	0	'--	not reported	8500-03-01	Infiltrating duct carcinoma, NOS	no	No	not reported	Head of pancreas	No	Head of pancreas	not reported	2011	no	Radiation Therapy, NOS	Yes	1.36986	25	25
TCGA-2L-AAQE	56	-20618	684	not reported	male	white	Dead	1955	20618	M0	N1	Stage IIB	T3	7th	not reported	0	'--	not reported	8500-03-01	Infiltrating duct carcinoma, NOS	no	No	not reported	Head of pancreas	No	Head of pancreas	not reported	2011	yes	Pharmaceutical Therapy, NOS	Yes	1.58904	29	29
TCGA-FB-A4P6	54	-19904	'--	not hispanic or latino	male	white	Alive	1958	19904	MX	N1	Stage IIB	T3	7th	not reported	0	767	not reported	8500-03-01	Infiltrating duct carcinoma, NOS	no	No	not reported	Head of pancreas	No	Head of pancreas	not reported	2012	yes	Radiation Therapy, NOS	Yes	'--	'--	'--
TCGA-FB-A4P6	54	-19904	'--	not hispanic or latino	male	white	Alive	1958	19904	MX	N1	Stage IIB	T3	7th	not reported	0	767	not reported	8500-03-01	Infiltrating duct carcinoma, NOS	no	No	not reported	Head of pancreas	No	Head of pancreas	not reported	2012	yes	Pharmaceutical Therapy, NOS	Yes	1.42466	26	'--
TCGA-HZ-A9TJ	70	-25849	'--	not hispanic or latino	male	white	Alive	1943	25849	M1	N0	Stage IV	T3	7th	not reported	0	603	not reported	8140-03-01	Adenocarcinoma, NOS	no	No	not reported	Tail of pancreas	No	Tail of pancreas	not reported	2013	no	Radiation Therapy, NOS	No	0.821918	15	'--
TCGA-HZ-A9TJ	70	-25849	'--	not hispanic or latino	male	white	Alive	1943	25849	M1	N0	Stage IV	T3	7th	not reported	0	603	not reported	8140-03-01	Adenocarcinoma, NOS	no	No	not reported	Tail of pancreas	No	Tail of pancreas	not reported	2013	yes	Pharmaceutical Therapy, NOS	No	'--	'--	'--
TCGA-FB-AAPY	71	-26085	1059	not hispanic or latino	male	white	Dead	1936	26085	MX	N1	Stage IIB	T2	7th	not reported	0	'--	not reported	8500-03-01	Infiltrating duct carcinoma, NOS	no	No	not reported	Head of pancreas	No	Head of pancreas	not reported	2007	yes	Pharmaceutical Therapy, NOS	Yes	'--	'--	'--
TCGA-FB-AAPY	71	-26085	1059	not hispanic or latino	male	white	Dead	1936	26085	MX	N1	Stage IIB	T2	7th	not reported	0	'--	not reported	8500-03-01	Infiltrating duct carcinoma, NOS	no	No	not reported	Head of pancreas	No	Head of pancreas	not reported	2007	yes	Radiation Therapy, NOS	Yes	'--	'--	'--
TCGA-3A-A9IX	40	-14729	'--	not hispanic or latino	male	white	Alive	1972	14729	MX	N0	Stage IA	T1	7th	not reported	0	1037	not reported	8500-03-01	Infiltrating duct carcinoma, NOS	no	No	not reported	Head of pancreas	No	Head of pancreas	not reported	2012	yes	Radiation Therapy, NOS	Yes	'--	'--	'--
TCGA-3A-A9IX	40	-14729	'--	not hispanic or latino	male	white	Alive	1972	14729	MX	N0	Stage IA	T1	7th	not reported	0	1037	not reported	8500-03-01	Infiltrating duct carcinoma, NOS	no	No	not reported	Head of pancreas	No	Head of pancreas	not reported	2012	yes	Pharmaceutical Therapy, NOS	Yes	'--	'--	'--
TCGA-3A-A9I5	57	-21175	'--	not hispanic or latino	male	white	Alive	1952	21175	MX	N0	'--	'--	6th	not reported	0	1794	not reported	8500-03-01	Infiltrating duct carcinoma, NOS	yes	No	not reported	Head of pancreas	No	Head of pancreas	not reported	2009	yes	Pharmaceutical Therapy, NOS	Yes	1.64384	30	'--
TCGA-3A-A9I5	57	-21175	'--	not hispanic or latino	male	white	Alive	1952	21175	MX	N0	'--	'--	6th	not reported	0	1794	not reported	8500-03-01	Infiltrating duct carcinoma, NOS	yes	No	not reported	Head of pancreas	No	Head of pancreas	not reported	2009	yes	Radiation Therapy, NOS	Yes	'--	'--	'--
TCGA-XD-AAUI	50	-18607	366	not hispanic or latino	female	white	Dead	1963	18607	MX	N1	Stage IIB	T3	7th	not reported	0	202	not reported	8500-03-01	Infiltrating duct carcinoma, NOS	no	No	not reported	Head of pancreas	No	Head of pancreas	not reported	2013	yes	Pharmaceutical Therapy, NOS	No	'--	'--	'--
TCGA-XD-AAUI	50	-18607	366	not hispanic or latino	female	white	Dead	1963	18607	MX	N1	Stage IIB	T3	7th	not reported	0	202	not reported	8500-03-01	Infiltrating duct carcinoma, NOS	no	No	not reported	Head of pancreas	No	Head of pancreas	not reported	2013	no	Radiation Therapy, NOS	No	2.79452	51	'--
TCGA-3E-AAAZ	71	-26234	2182	hispanic or latino	male	white	Dead	1937	26234	MX	N0	Stage IIA	T3	6th	not reported	0	'--	not reported	8500-03-01	Infiltrating duct carcinoma, NOS	no	No	not reported	Head of pancreas	No	Head of pancreas	not reported	2008	yes	Pharmaceutical Therapy, NOS	No	'--	'--	'--
TCGA-3E-AAAZ	71	-26234	2182	hispanic or latino	male	white	Dead	1937	26234	MX	N0	Stage IIA	T3	6th	not reported	0	'--	not reported	8500-03-01	Infiltrating duct carcinoma, NOS	no	No	not reported	Head of pancreas	No	Head of pancreas	not reported	2008	not reported	Radiation Therapy, NOS	No	3.12329	57	'--
TCGA-RB-AA9M	43	-15807	'--	not hispanic or latino	male	white	Alive	1970	15807	MX	N1	Stage IIB	T1	7th	not reported	0	286	not reported	8500-03-01	Infiltrating duct carcinoma, NOS	no	No	not reported	Tail of pancreas	No	Tail of pancreas	not reported	2013	yes	Radiation Therapy, NOS	No	1.36986	25	25
TCGA-RB-AA9M	43	-15807	'--	not hispanic or latino	male	white	Alive	1970	15807	MX	N1	Stage IIB	T1	7th	not reported	0	286	not reported	8500-03-01	Infiltrating duct carcinoma, NOS	no	No	not reported	Tail of pancreas	No	Tail of pancreas	not reported	2013	yes	Pharmaceutical Therapy, NOS	Yes	2.52055	46	'--
TCGA-FZ-5920	52	-19287	61	not hispanic or latino	male	black or african american	Dead	1955	19287	M0	N1	Stage IIB	T3	6th	not reported	0	'--	not reported	8500-03-01	Infiltrating duct carcinoma, NOS	no	No	not reported	Head of pancreas	No	Head of pancreas	not reported	2007	no	Pharmaceutical Therapy, NOS	Yes	'--	'--	'--
TCGA-FZ-5920	52	-19287	61	not hispanic or latino	male	black or african american	Dead	1955	19287	M0	N1	Stage IIB	T3	6th	not reported	0	'--	not reported	8500-03-01	Infiltrating duct carcinoma, NOS	no	No	not reported	Head of pancreas	No	Head of pancreas	not reported	2007	no	Radiation Therapy, NOS	No	'--	'--	'--
TCGA-2L-AAQI	66	-24381	103	not reported	male	white	Dead	1945	24381	MX	N1	Stage IIB	T3	7th	not reported	0	'--	not reported	8500-03-01	Infiltrating duct carcinoma, NOS	no	No	not reported	Head of pancreas	No	Head of pancreas	not reported	2011	yes	Pharmaceutical Therapy, NOS	Yes	'--	'--	'--
TCGA-2L-AAQI	66	-24381	103	not reported	male	white	Dead	1945	24381	MX	N1	Stage IIB	T3	7th	not reported	0	'--	not reported	8500-03-01	Infiltrating duct carcinoma, NOS	no	No	not reported	Head of pancreas	No	Head of pancreas	not reported	2011	no	Radiation Therapy, NOS	Yes	1.91781	35	'--
TCGA-HZ-8317	69	-25214	378	not hispanic or latino	female	white	Dead	1943	25214	MX	N1	Stage IIB	T3	7th	not reported	0	16	not reported	8500-03-01	Infiltrating duct carcinoma, NOS	no	No	not reported	Head of pancreas	No	Head of pancreas	not reported	2012	yes	Radiation Therapy, NOS	Yes	'--	'--	'--
TCGA-HZ-8317	69	-25214	378	not hispanic or latino	female	white	Dead	1943	25214	MX	N1	Stage IIB	T3	7th	not reported	0	16	not reported	8500-03-01	Infiltrating duct carcinoma, NOS	no	No	not reported	Head of pancreas	No	Head of pancreas	not reported	2012	yes	Pharmaceutical Therapy, NOS	Yes	'--	'--	'--
TCGA-3A-A9J0	75	-27453	'--	not hispanic or latino	male	white	Alive	1937	27453	MX	N1	Stage IIB	T3	7th	not reported	0	743	not reported	8500-03-01	Infiltrating duct carcinoma, NOS	no	No	not reported	Head of pancreas	No	Head of pancreas	not reported	2012	yes	Pharmaceutical Therapy, NOS	No	'--	'--	'--
TCGA-3A-A9J0	75	-27453	'--	not hispanic or latino	male	white	Alive	1937	27453	MX	N1	Stage IIB	T3	7th	not reported	0	743	not reported	8500-03-01	Infiltrating duct carcinoma, NOS	no	No	not reported	Head of pancreas	No	Head of pancreas	not reported	2012	no	Radiation Therapy, NOS	Yes	'--	'--	'--
TCGA-2J-AABP	58	-21484	'--	not reported	female	white	Alive	1955	21484	M0	N1	Stage IIB	T3	7th	not reported	0	463	not reported	8020-03-01	Carcinoma, undifferentiated, NOS	no	No	not reported	Tail of pancreas	No	Tail of pancreas	not reported	2013	yes	Pharmaceutical Therapy, NOS	No	'--	'--	'--
TCGA-2J-AABP	58	-21484	'--	not reported	female	white	Alive	1955	21484	M0	N1	Stage IIB	T3	7th	not reported	0	463	not reported	8020-03-01	Carcinoma, undifferentiated, NOS	no	No	not reported	Tail of pancreas	No	Tail of pancreas	not reported	2013	no	Radiation Therapy, NOS	No	1.09589	20	'--
TCGA-FZ-5922	81	-29633	1101	not hispanic or latino	male	white	Dead	1926	29633	M0	N0	Stage IIA	T3	6th	not reported	0	'--	not reported	8500-03-01	Infiltrating duct carcinoma, NOS	no	No	not reported	Head of pancreas	No	Head of pancreas	not reported	2007	yes	Pharmaceutical Therapy, NOS	No	'--	'--	'--
TCGA-FZ-5922	81	-29633	1101	not hispanic or latino	male	white	Dead	1926	29633	M0	N0	Stage IIA	T3	6th	not reported	0	'--	not reported	8500-03-01	Infiltrating duct carcinoma, NOS	no	No	not reported	Head of pancreas	No	Head of pancreas	not reported	2007	yes	Radiation Therapy, NOS	No	'--	'--	'--
TCGA-IB-AAUU	35	-13127	'--	not hispanic or latino	male	white	Alive	1978	13127	M0	N1	Stage IIB	T3	7th	not reported	0	245	not reported	8500-03-01	Infiltrating duct carcinoma, NOS	no	No	not reported	Head of pancreas	No	Head of pancreas	not reported	2013	no	Radiation Therapy, NOS	Not Reported	'--	'--	'--
TCGA-IB-AAUU	35	-13127	'--	not hispanic or latino	male	white	Alive	1978	13127	M0	N1	Stage IIB	T3	7th	not reported	0	245	not reported	8500-03-01	Infiltrating duct carcinoma, NOS	no	No	not reported	Head of pancreas	No	Head of pancreas	not reported	2013	yes	Pharmaceutical Therapy, NOS	No	1.64384	30	'--
TCGA-2J-AAB9	70	-25920	627	not reported	female	white	Dead	1942	25920	M0	N1	Stage IIB	T3	7th	not reported	0	'--	not reported	8500-03-01	Infiltrating duct carcinoma, NOS	no	No	not reported	Head of pancreas	No	Head of pancreas	not reported	2012	yes	Pharmaceutical Therapy, NOS	Yes	'--	'--	'--
TCGA-2J-AAB9	70	-25920	627	not reported	female	white	Dead	1942	25920	M0	N1	Stage IIB	T3	7th	not reported	0	'--	not reported	8500-03-01	Infiltrating duct carcinoma, NOS	no	No	not reported	Head of pancreas	No	Head of pancreas	not reported	2012	yes	Radiation Therapy, NOS	No	'--	'--	'--
TCGA-3E-AAAY	67	-24760	'--	not hispanic or latino	male	white	Alive	1941	24760	MX	N1	Stage IIB	T3	6th	not reported	0	2285	not reported	8500-03-01	Infiltrating duct carcinoma, NOS	no	No	not reported	Body of pancreas	No	Body of pancreas	not reported	2008	no	Radiation Therapy, NOS	No	'--	'--	'--
TCGA-3E-AAAY	67	-24760	'--	not hispanic or latino	male	white	Alive	1941	24760	MX	N1	Stage IIB	T3	6th	not reported	0	2285	not reported	8500-03-01	Infiltrating duct carcinoma, NOS	no	No	not reported	Body of pancreas	No	Body of pancreas	not reported	2008	yes	Pharmaceutical Therapy, NOS	Yes	2.30137	42	31
TCGA-2J-AABO	43	-15869	'--	not reported	male	white	Alive	1970	15869	M0	N1	Stage IIB	T3	7th	not reported	0	440	not reported	8500-03-01	Infiltrating duct carcinoma, NOS	no	No	not reported	Head of pancreas	No	Head of pancreas	not reported	2013	yes	Pharmaceutical Therapy, NOS	No	0.109589	2	20
TCGA-2J-AABO	43	-15869	'--	not reported	male	white	Alive	1970	15869	M0	N1	Stage IIB	T3	7th	not reported	0	440	not reported	8500-03-01	Infiltrating duct carcinoma, NOS	no	No	not reported	Head of pancreas	No	Head of pancreas	not reported	2013	yes	Radiation Therapy, NOS	No	'--	'--	'--
TCGA-S4-A8RO	75	-27645	'--	not hispanic or latino	female	white	Alive	1938	27645	MX	N1	Stage IIB	T3	7th	not reported	0	525	not reported	8500-03-01	Infiltrating duct carcinoma, NOS	yes	No	not reported	Head of pancreas	No	Head of pancreas	not reported	2013	yes	Pharmaceutical Therapy, NOS	No	'--	'--	'--
TCGA-S4-A8RO	75	-27645	'--	not hispanic or latino	female	white	Alive	1938	27645	MX	N1	Stage IIB	T3	7th	not reported	0	525	not reported	8500-03-01	Infiltrating duct carcinoma, NOS	yes	No	not reported	Head of pancreas	No	Head of pancreas	not reported	2013	yes	Radiation Therapy, NOS	Yes	'--	'--	'--
TCGA-L1-A7W4	48	-17821	278	not hispanic or latino	female	white	Dead	1965	17821	M0	N1	Stage IIB	T3	7th	not reported	0	164	not reported	8500-03-01	Infiltrating duct carcinoma, NOS	no	No	not reported	Head of pancreas	No	Head of pancreas	not reported	2013	yes	Pharmaceutical Therapy, NOS	No	'--	'--	'--
TCGA-L1-A7W4	48	-17821	278	not hispanic or latino	female	white	Dead	1965	17821	M0	N1	Stage IIB	T3	7th	not reported	0	164	not reported	8500-03-01	Infiltrating duct carcinoma, NOS	no	No	not reported	Head of pancreas	No	Head of pancreas	not reported	2013	no	Radiation Therapy, NOS	No	'--	'--	'--
TCGA-HZ-7924	60	-22090	'--	not hispanic or latino	female	white	Alive	1951	22090	MX	N0	Stage IIA	T3	7th	not reported	0	840	not reported	8500-03-01	Infiltrating duct carcinoma, NOS	no	No	not reported	Head of pancreas	No	Head of pancreas	not reported	2011	yes	Pharmaceutical Therapy, NOS	No	1.09589	20	'--
TCGA-HZ-7924	60	-22090	'--	not hispanic or latino	female	white	Alive	1951	22090	MX	N0	Stage IIA	T3	7th	not reported	0	840	not reported	8500-03-01	Infiltrating duct carcinoma, NOS	no	No	not reported	Head of pancreas	No	Head of pancreas	not reported	2011	no	Radiation Therapy, NOS	Yes	0.0164384	0.3	2
TCGA-IB-AAUQ	50	-18315	183	not hispanic or latino	male	white	Dead	1963	18315	M0	N1	Stage IIB	T3	7th	not reported	0	'--	not reported	8500-03-01	Infiltrating duct carcinoma, NOS	no	No	not reported	Tail of pancreas	No	Tail of pancreas	not reported	2013	yes	Pharmaceutical Therapy, NOS	No	'--	'--	'--
TCGA-IB-AAUQ	50	-18315	183	not hispanic or latino	male	white	Dead	1963	18315	M0	N1	Stage IIB	T3	7th	not reported	0	'--	not reported	8500-03-01	Infiltrating duct carcinoma, NOS	no	No	not reported	Tail of pancreas	No	Tail of pancreas	not reported	2013	no	Radiation Therapy, NOS	No	'--	'--	'--
TCGA-FB-A545	72	-26635	732	not hispanic or latino	female	white	Dead	1940	26635	M0	N1	Stage IIB	T3	7th	not reported	0	385	not reported	8500-03-01	Infiltrating duct carcinoma, NOS	no	No	not reported	Body of pancreas	No	Body of pancreas	not reported	2012	yes	Pharmaceutical Therapy, NOS	No	'--	'--	'--
TCGA-FB-A545	72	-26635	732	not hispanic or latino	female	white	Dead	1940	26635	M0	N1	Stage IIB	T3	7th	not reported	0	385	not reported	8500-03-01	Infiltrating duct carcinoma, NOS	no	No	not reported	Body of pancreas	No	Body of pancreas	not reported	2012	yes	Radiation Therapy, NOS	Not Reported	'--	'--	'--
TCGA-FB-A4P5	69	-25412	179	not hispanic or latino	female	white	Dead	1943	25412	MX	N1	Stage IIB	T3	7th	not reported	0	4	not reported	8500-03-01	Infiltrating duct carcinoma, NOS	no	No	not reported	Head of pancreas	No	Head of pancreas	not reported	2012	not reported	Radiation Therapy, NOS	Yes	1.09589	20	'--
TCGA-FB-A4P5	69	-25412	179	not hispanic or latino	female	white	Dead	1943	25412	MX	N1	Stage IIB	T3	7th	not reported	0	4	not reported	8500-03-01	Infiltrating duct carcinoma, NOS	no	No	not reported	Head of pancreas	No	Head of pancreas	not reported	2012	yes	Pharmaceutical Therapy, NOS	No	0.832877	15.2	'--
TCGA-XD-AAUH	57	-20858	'--	not hispanic or latino	female	white	Alive	1956	20858	M0	N1	Stage IIB	T3	7th	not reported	0	395	not reported	8500-03-01	Infiltrating duct carcinoma, NOS	no	No	not reported	Head of pancreas	No	Head of pancreas	not reported	2013	yes	Radiation Therapy, NOS	Yes	4.10959	75	'--
TCGA-XD-AAUH	57	-20858	'--	not hispanic or latino	female	white	Alive	1956	20858	M0	N1	Stage IIB	T3	7th	not reported	0	395	not reported	8500-03-01	Infiltrating duct carcinoma, NOS	no	No	not reported	Head of pancreas	No	Head of pancreas	not reported	2013	yes	Pharmaceutical Therapy, NOS	Yes	'--	'--	'--
TCGA-YB-A89D	59	-21792	'--	not hispanic or latino	male	white	Alive	1954	21792	MX	N1	Stage IIB	T3	7th	not reported	0	350	not reported	8500-03-01	Infiltrating duct carcinoma, NOS	no	No	not reported	Body of pancreas	No	Body of pancreas	not reported	2013	yes	Pharmaceutical Therapy, NOS	No	0.273973	5	20
TCGA-YB-A89D	59	-21792	'--	not hispanic or latino	male	white	Alive	1954	21792	MX	N1	Stage IIB	T3	7th	not reported	0	350	not reported	8500-03-01	Infiltrating duct carcinoma, NOS	no	No	not reported	Body of pancreas	No	Body of pancreas	not reported	2013	yes	Radiation Therapy, NOS	Yes	1.64384	30	30
TCGA-HZ-A8P1	81	-29631	'--	not hispanic or latino	male	white	Alive	1932	29631	MX	N0	Stage IB	T2	7th	not reported	0	7	not reported	8500-03-01	Infiltrating duct carcinoma, NOS	no	No	not reported	Tail of pancreas	No	Tail of pancreas	not reported	2013	not reported	Pharmaceutical Therapy, NOS	Yes	'--	'--	'--
TCGA-HZ-A8P1	81	-29631	'--	not hispanic or latino	male	white	Alive	1932	29631	MX	N0	Stage IB	T2	7th	not reported	0	7	not reported	8500-03-01	Infiltrating duct carcinoma, NOS	no	No	not reported	Tail of pancreas	No	Tail of pancreas	not reported	2013	not reported	Radiation Therapy, NOS	Yes	1.31507	24	47
TCGA-IB-A5SP	77	-28317	'--	not reported	male	white	Alive	1934	28317	M0	N0	Stage IIA	T3	7th	not reported	0	482	not reported	8500-03-01	Infiltrating duct carcinoma, NOS	no	No	not reported	Head of pancreas	No	Head of pancreas	not reported	2011	no	Radiation Therapy, NOS	Not Reported	'--	'--	'--
TCGA-IB-A5SP	77	-28317	'--	not reported	male	white	Alive	1934	28317	M0	N0	Stage IIA	T3	7th	not reported	0	482	not reported	8500-03-01	Infiltrating duct carcinoma, NOS	no	No	not reported	Head of pancreas	No	Head of pancreas	not reported	2011	yes	Pharmaceutical Therapy, NOS	Yes	0.219178	4	4
TCGA-2J-AABK	71	-26188	'--	not reported	male	white	Alive	1941	26188	M0	N1	Stage IIB	T3	7th	not reported	0	484	not reported	8500-03-01	Infiltrating duct carcinoma, NOS	no	No	not reported	Head of pancreas	No	Head of pancreas	not reported	2012	yes	Radiation Therapy, NOS	No	'--	'--	'--
TCGA-2J-AABK	71	-26188	'--	not reported	male	white	Alive	1941	26188	M0	N1	Stage IIB	T3	7th	not reported	0	484	not reported	8500-03-01	Infiltrating duct carcinoma, NOS	no	No	not reported	Head of pancreas	No	Head of pancreas	not reported	2012	yes	Pharmaceutical Therapy, NOS	Yes	1.84932	33.75	'--
TCGA-PZ-A5RE	44	-16255	470	not hispanic or latino	female	white	Dead	1968	16255	MX	N1	Stage IIB	T3	7th	not reported	0	247	not reported	8500-03-01	Infiltrating duct carcinoma, NOS	no	No	not reported	Head of pancreas	No	Head of pancreas	not reported	2012	yes	Pharmaceutical Therapy, NOS	No	'--	'--	'--
TCGA-PZ-A5RE	44	-16255	470	not hispanic or latino	female	white	Dead	1968	16255	MX	N1	Stage IIB	T3	7th	not reported	0	247	not reported	8500-03-01	Infiltrating duct carcinoma, NOS	no	No	not reported	Head of pancreas	No	Head of pancreas	not reported	2012	yes	Radiation Therapy, NOS	Yes	1.64384	30	20
TCGA-2J-AABH	61	-22425	'--	not reported	male	white	Alive	1950	22425	M0	N0	Stage IIA	T3	7th	not reported	0	1287	not reported	8140-03-01	Adenocarcinoma, NOS	no	No	not reported	Body of pancreas	No	Body of pancreas	not reported	2011	yes	Pharmaceutical Therapy, NOS	Not Reported	'--	'--	'--
TCGA-2J-AABH	61	-22425	'--	not reported	male	white	Alive	1950	22425	M0	N0	Stage IIA	T3	7th	not reported	0	1287	not reported	8140-03-01	Adenocarcinoma, NOS	no	No	not reported	Body of pancreas	No	Body of pancreas	not reported	2011	no	Radiation Therapy, NOS	No	'--	'--	'--
TCGA-RL-AAAS	60	-22126	'--	not hispanic or latino	female	white	Alive	1953	22126	M0	N0	Stage IB	T2	7th	not reported	0	9	not reported	8500-03-01	Infiltrating duct carcinoma, NOS	no	No	not reported	Head of pancreas	No	Head of pancreas	not reported	2013	no	Radiation Therapy, NOS	Yes	'--	'--	'--
TCGA-RL-AAAS	60	-22126	'--	not hispanic or latino	female	white	Alive	1953	22126	M0	N0	Stage IB	T2	7th	not reported	0	9	not reported	8500-03-01	Infiltrating duct carcinoma, NOS	no	No	not reported	Head of pancreas	No	Head of pancreas	not reported	2013	no	Pharmaceutical Therapy, NOS	Not Reported	'--	'--	'--
TCGA-F2-6880	70	-25809	'--	not reported	male	white	Alive	1939	25809	M0	N1	Stage IIB	T3	6th	not reported	0	295	not reported	8140-03-01	Adenocarcinoma, NOS	no	No	not reported	Head of pancreas	No	Head of pancreas	not reported	2009	no	Radiation Therapy, NOS	Yes	'--	'--	'--
TCGA-F2-6880	70	-25809	'--	not reported	male	white	Alive	1939	25809	M0	N1	Stage IIB	T3	6th	not reported	0	295	not reported	8140-03-01	Adenocarcinoma, NOS	no	No	not reported	Head of pancreas	No	Head of pancreas	not reported	2009	yes	Pharmaceutical Therapy, NOS	No	'--	'--	'--
TCGA-IB-A5SO	71	-26129	365	not reported	male	white	Dead	1941	26129	M0	N1	Stage IIB	T3	7th	not reported	0	329	not reported	8500-03-01	Infiltrating duct carcinoma, NOS	no	No	not reported	Head of pancreas	No	Head of pancreas	not reported	2012	no	Radiation Therapy, NOS	No	'--	'--	'--
TCGA-IB-A5SO	71	-26129	365	not reported	male	white	Dead	1941	26129	M0	N1	Stage IIB	T3	7th	not reported	0	329	not reported	8500-03-01	Infiltrating duct carcinoma, NOS	no	No	not reported	Head of pancreas	No	Head of pancreas	not reported	2012	yes	Pharmaceutical Therapy, NOS	No	'--	'--	'--
TCGA-S4-A8RM	67	-24589	'--	not hispanic or latino	male	white	Alive	1946	24589	MX	N1	Stage IIB	T3	7th	not reported	0	737	not reported	8500-03-01	Infiltrating duct carcinoma, NOS	no	No	not reported	Pancreas, NOS	No	Pancreas, NOS	not reported	2013	yes	Pharmaceutical Therapy, NOS	Yes	'--	'--	'--
TCGA-S4-A8RM	67	-24589	'--	not hispanic or latino	male	white	Alive	1946	24589	MX	N1	Stage IIB	T3	7th	not reported	0	737	not reported	8500-03-01	Infiltrating duct carcinoma, NOS	no	No	not reported	Pancreas, NOS	No	Pancreas, NOS	not reported	2013	no	Radiation Therapy, NOS	Yes	'--	'--	'--
TCGA-IB-7891	49	-18202	913	not hispanic or latino	female	white	Dead	1962	18202	M0	N1	Stage IIB	T3	7th	not reported	0	648	not reported	8500-03-01	Infiltrating duct carcinoma, NOS	no	No	not reported	Pancreas, NOS	No	Pancreas, NOS	not reported	2011	no	Radiation Therapy, NOS	Yes	'--	'--	'--
TCGA-IB-7891	49	-18202	913	not hispanic or latino	female	white	Dead	1962	18202	M0	N1	Stage IIB	T3	7th	not reported	0	648	not reported	8500-03-01	Infiltrating duct carcinoma, NOS	no	No	not reported	Pancreas, NOS	No	Pancreas, NOS	not reported	2011	yes	Pharmaceutical Therapy, NOS	Not Reported	'--	'--	'--
TCGA-3A-A9IU	65	-23998	458	not hispanic or latino	male	white	Dead	1946	23998	MX	N1	Stage IIB	T3	7th	not reported	0	'--	not reported	8500-03-01	Infiltrating duct carcinoma, NOS	no	No	not reported	Head of pancreas	No	Head of pancreas	not reported	2011	yes	Pharmaceutical Therapy, NOS	Not Reported	'--	'--	'--
TCGA-3A-A9IU	65	-23998	458	not hispanic or latino	male	white	Dead	1946	23998	MX	N1	Stage IIB	T3	7th	not reported	0	'--	not reported	8500-03-01	Infiltrating duct carcinoma, NOS	no	No	not reported	Head of pancreas	No	Head of pancreas	not reported	2011	no	Radiation Therapy, NOS	Yes	2.19178	40	'--
TCGA-S4-A8RP	77	-28353	702	not reported	female	white	Dead	1933	28353	MX	N1	Stage IIB	T3	7th	not reported	0	'--	not reported	8500-03-01	Infiltrating duct carcinoma, NOS	no	No	not reported	Head of pancreas	No	Head of pancreas	not reported	2010	yes	Pharmaceutical Therapy, NOS	No	'--	'--	'--
TCGA-S4-A8RP	77	-28353	702	not reported	female	white	Dead	1933	28353	MX	N1	Stage IIB	T3	7th	not reported	0	'--	not reported	8500-03-01	Infiltrating duct carcinoma, NOS	no	No	not reported	Head of pancreas	No	Head of pancreas	not reported	2010	yes	Radiation Therapy, NOS	Yes	2.19178	40	'--
TCGA-HZ-A77Q	55	-20366	'--	not hispanic or latino	female	white	Alive	1958	20366	MX	N1	Stage IIB	T3	7th	not reported	0	33	not reported	8140-03-01	Adenocarcinoma, NOS	yes	No	not reported	Head of pancreas	No	Head of pancreas	not reported	2013	not reported	Pharmaceutical Therapy, NOS	Yes	'--	'--	15
TCGA-HZ-A77Q	55	-20366	'--	not hispanic or latino	female	white	Alive	1958	20366	MX	N1	Stage IIB	T3	7th	not reported	0	33	not reported	8140-03-01	Adenocarcinoma, NOS	yes	No	not reported	Head of pancreas	No	Head of pancreas	not reported	2013	not reported	Radiation Therapy, NOS	Yes	0.120548	2.2	10
TCGA-3A-A9IS	67	-24621	'--	not hispanic or latino	male	white	Alive	1943	24621	MX	N0	Stage IB	T2	7th	not reported	0	998	not reported	8246-03-01	Neuroendocrine carcinoma, NOS	no	No	not reported	Body of pancreas	No	Body of pancreas	not reported	2010	no	Pharmaceutical Therapy, NOS	Yes	'--	'--	'--
TCGA-3A-A9IS	67	-24621	'--	not hispanic or latino	male	white	Alive	1943	24621	MX	N0	Stage IB	T2	7th	not reported	0	998	not reported	8246-03-01	Neuroendocrine carcinoma, NOS	no	No	not reported	Body of pancreas	No	Body of pancreas	not reported	2010	no	Radiation Therapy, NOS	No	'--	'--	'--
TCGA-IB-AAUM	76	-28013	'--	not hispanic or latino	male	white	Alive	1937	28013	M0	N1	Stage IIB	T2	7th	not reported	0	8	not reported	8500-03-01	Infiltrating duct carcinoma, NOS	no	No	not reported	Head of pancreas	No	Head of pancreas	not reported	2013	no	Radiation Therapy, NOS	Yes	1.64384	30	'--
TCGA-IB-AAUM	76	-28013	'--	not hispanic or latino	male	white	Alive	1937	28013	M0	N1	Stage IIB	T2	7th	not reported	0	8	not reported	8500-03-01	Infiltrating duct carcinoma, NOS	no	No	not reported	Head of pancreas	No	Head of pancreas	not reported	2013	no	Pharmaceutical Therapy, NOS	Yes	'--	'--	'--
TCGA-IB-7647	41	-15188	666	not hispanic or latino	male	white	Dead	1967	15188	M0	N1	Stage IIB	T3	6th	not reported	0	'--	not reported	8500-03-01	Infiltrating duct carcinoma, NOS	no	No	not reported	Head of pancreas	No	Head of pancreas	not reported	2008	yes	Pharmaceutical Therapy, NOS	Yes	'--	'--	'--
TCGA-IB-7647	41	-15188	666	not hispanic or latino	male	white	Dead	1967	15188	M0	N1	Stage IIB	T3	6th	not reported	0	'--	not reported	8500-03-01	Infiltrating duct carcinoma, NOS	no	No	not reported	Head of pancreas	No	Head of pancreas	not reported	2008	no	Radiation Therapy, NOS	Not Reported	'--	'--	'--
TCGA-IB-7646	60	-22148	145	not hispanic or latino	male	white	Dead	1947	22148	M0	N1	Stage IIB	T3	6th	not reported	0	'--	not reported	8500-03-01	Infiltrating duct carcinoma, NOS	no	No	not reported	Head of pancreas	No	Head of pancreas	not reported	2007	no	Pharmaceutical Therapy, NOS	No	'--	'--	'--
TCGA-IB-7646	60	-22148	145	not hispanic or latino	male	white	Dead	1947	22148	M0	N1	Stage IIB	T3	6th	not reported	0	'--	not reported	8500-03-01	Infiltrating duct carcinoma, NOS	no	No	not reported	Head of pancreas	No	Head of pancreas	not reported	2007	no	Radiation Therapy, NOS	No	'--	'--	'--
TCGA-US-A776	61	-22283	'--	not hispanic or latino	male	white	Alive	1950	22283	MX	N0	Stage IIA	T3	7th	not reported	0	1216	not reported	8480-03-01	Mucinous adenocarcinoma	no	No	not reported	Head of pancreas	No	Head of pancreas	not reported	2011	no	Pharmaceutical Therapy, NOS	Yes	'--	'--	'--
TCGA-US-A776	61	-22283	'--	not hispanic or latino	male	white	Alive	1950	22283	MX	N0	Stage IIA	T3	7th	not reported	0	1216	not reported	8480-03-01	Mucinous adenocarcinoma	no	No	not reported	Head of pancreas	No	Head of pancreas	not reported	2011	no	Radiation Therapy, NOS	Yes	0.254795	4.65	37
TCGA-FB-A7DR	48	-17649	353	not hispanic or latino	male	asian	Dead	1964	17649	M0	NX	Stage IIA	T3	7th	not reported	0	166	not reported	8480-03-01	Mucinous adenocarcinoma	no	No	not reported	Head of pancreas	No	Head of pancreas	not reported	2012	no	Radiation Therapy, NOS	Yes	'--	'--	'--
TCGA-FB-A7DR	48	-17649	353	not hispanic or latino	male	asian	Dead	1964	17649	M0	NX	Stage IIA	T3	7th	not reported	0	166	not reported	8480-03-01	Mucinous adenocarcinoma	no	No	not reported	Head of pancreas	No	Head of pancreas	not reported	2012	not reported	Pharmaceutical Therapy, NOS	Not Reported	2.19178	40	40
TCGA-HV-A5A3	50	-18475	128	not reported	male	asian	Dead	1962	18475	MX	NX	Stage IIA	T3	7th	not reported	0	'--	not reported	8500-03-01	Infiltrating duct carcinoma, NOS	no	No	not reported	Body of pancreas	No	Body of pancreas	not reported	2012	no	Radiation Therapy, NOS	Yes	'--	'--	'--
TCGA-HV-A5A3	50	-18475	128	not reported	male	asian	Dead	1962	18475	MX	NX	Stage IIA	T3	7th	not reported	0	'--	not reported	8500-03-01	Infiltrating duct carcinoma, NOS	no	No	not reported	Body of pancreas	No	Body of pancreas	not reported	2012	yes	Pharmaceutical Therapy, NOS	Yes	3.28767	60	'--
TCGA-2L-AAQA	76	-28074	143	not reported	male	white	Dead	1934	28074	MX	N1	Stage IIB	T3	7th	not reported	0	'--	not reported	8500-03-01	Infiltrating duct carcinoma, NOS	no	No	not reported	Pancreas, NOS	No	Pancreas, NOS	not reported	2010	no	Radiation Therapy, NOS	Yes	'--	'--	'--
TCGA-2L-AAQA	76	-28074	143	not reported	male	white	Dead	1934	28074	MX	N1	Stage IIB	T3	7th	not reported	0	'--	not reported	8500-03-01	Infiltrating duct carcinoma, NOS	no	No	not reported	Pancreas, NOS	No	Pancreas, NOS	not reported	2010	yes	Pharmaceutical Therapy, NOS	Yes	'--	'--	'--
TCGA-3A-A9IN	62	-22799	'--	not hispanic or latino	female	white	Alive	1946	22799	MX	NX	Stage IB	T2	6th	not reported	0	2084	not reported	8246-03-01	Neuroendocrine carcinoma, NOS	no	No	not reported	Body of pancreas	No	Body of pancreas	not reported	2008	yes	Radiation Therapy, NOS	Yes	'--	'--	'--
TCGA-3A-A9IN	62	-22799	'--	not hispanic or latino	female	white	Alive	1946	22799	MX	NX	Stage IB	T2	6th	not reported	0	2084	not reported	8246-03-01	Neuroendocrine carcinoma, NOS	no	No	not reported	Body of pancreas	No	Body of pancreas	not reported	2008	yes	Pharmaceutical Therapy, NOS	No	'--	'--	'--
TCGA-XN-A8T3	67	-24810	'--	hispanic or latino	male	white	Alive	1945	24810	M0	N0	Stage IB	T2	7th	not reported	0	951	not reported	8500-03-01	Infiltrating duct carcinoma, NOS	no	No	not reported	Head of pancreas	No	Head of pancreas	not reported	2012	yes	Pharmaceutical Therapy, NOS	No	'--	'--	'--
TCGA-XN-A8T3	67	-24810	'--	hispanic or latino	male	white	Alive	1945	24810	M0	N0	Stage IB	T2	7th	not reported	0	951	not reported	8500-03-01	Infiltrating duct carcinoma, NOS	no	No	not reported	Head of pancreas	No	Head of pancreas	not reported	2012	yes	Radiation Therapy, NOS	No	'--	'--	'--
TCGA-2J-AABA	55	-20133	607	not reported	male	white	Dead	1957	20133	M0	N1	Stage IIB	T3	7th	not reported	0	'--	not reported	8500-03-01	Infiltrating duct carcinoma, NOS	no	No	not reported	Head of pancreas	No	Head of pancreas	not reported	2012	no	Radiation Therapy, NOS	No	'--	'--	'--
TCGA-2J-AABA	55	-20133	607	not reported	male	white	Dead	1957	20133	M0	N1	Stage IIB	T3	7th	not reported	0	'--	not reported	8500-03-01	Infiltrating duct carcinoma, NOS	no	No	not reported	Head of pancreas	No	Head of pancreas	not reported	2012	yes	Pharmaceutical Therapy, NOS	Yes	1.64384	30	'--
TCGA-F2-7276	64	-23713	216	not hispanic or latino	male	white	Dead	1947	23713	M0	N1	Stage IIB	T3	7th	not reported	0	'--	not reported	8140-03-01	Adenocarcinoma, NOS	no	No	not reported	Pancreas, NOS	No	Pancreas, NOS	not reported	2011	yes	Pharmaceutical Therapy, NOS	Yes	'--	'--	'--
TCGA-F2-7276	64	-23713	216	not hispanic or latino	male	white	Dead	1947	23713	M0	N1	Stage IIB	T3	7th	not reported	0	'--	not reported	8140-03-01	Adenocarcinoma, NOS	no	No	not reported	Pancreas, NOS	No	Pancreas, NOS	not reported	2011	no	Radiation Therapy, NOS	Yes	'--	'--	'--
TCGA-IB-7649	73	-26773	467	not reported	female	not reported	Dead	1934	26773	M0	N1	Stage IIB	T3	6th	not reported	0	'--	not reported	8500-03-01	Infiltrating duct carcinoma, NOS	no	No	not reported	Head of pancreas	No	Head of pancreas	not reported	2007	no	Radiation Therapy, NOS	Yes	'--	'--	'--
TCGA-IB-7649	73	-26773	467	not reported	female	not reported	Dead	1934	26773	M0	N1	Stage IIB	T3	6th	not reported	0	'--	not reported	8500-03-01	Infiltrating duct carcinoma, NOS	no	No	not reported	Head of pancreas	No	Head of pancreas	not reported	2007	no	Pharmaceutical Therapy, NOS	Yes	'--	'--	'--
TCGA-FB-AAPQ	65	-24078	1130	not hispanic or latino	male	white	Dead	1943	24078	MX	N1	Stage IIB	T3	7th	not reported	0	'--	not reported	8500-03-01	Infiltrating duct carcinoma, NOS	no	No	not reported	Head of pancreas	No	Head of pancreas	not reported	2008	yes	Pharmaceutical Therapy, NOS	Yes	'--	'--	'--
TCGA-FB-AAPQ	65	-24078	1130	not hispanic or latino	male	white	Dead	1943	24078	MX	N1	Stage IIB	T3	7th	not reported	0	'--	not reported	8500-03-01	Infiltrating duct carcinoma, NOS	no	No	not reported	Head of pancreas	No	Head of pancreas	not reported	2008	no	Radiation Therapy, NOS	Yes	'--	'--	'--
TCGA-YY-A8LH	61	-22376	'--	not hispanic or latino	female	white	Alive	1948	22376	MX	N1	Stage IIB	T3	6th	not reported	0	2016	not reported	8500-03-01	Infiltrating duct carcinoma, NOS	no	No	not reported	Tail of pancreas	No	Tail of pancreas	not reported	2009	yes	Radiation Therapy, NOS	No	'--	'--	'--
TCGA-YY-A8LH	61	-22376	'--	not hispanic or latino	female	white	Alive	1948	22376	MX	N1	Stage IIB	T3	6th	not reported	0	2016	not reported	8500-03-01	Infiltrating duct carcinoma, NOS	no	No	not reported	Tail of pancreas	No	Tail of pancreas	not reported	2009	yes	Pharmaceutical Therapy, NOS	Yes	'--	'--	'--
TCGA-M8-A5N4	48	-17628	'--	not reported	female	not reported	Alive	'--	17628	M0	N0	Stage IIA	T3	6th	not reported	'--	584	not reported	8500-03-01	Infiltrating duct carcinoma, NOS	no	No	not reported	Head of pancreas	No	Head of pancreas	not reported	'--	yes	Radiation Therapy, NOS	No	0.547945	10	10
TCGA-M8-A5N4	48	-17628	'--	not reported	female	not reported	Alive	'--	17628	M0	N0	Stage IIA	T3	6th	not reported	'--	584	not reported	8500-03-01	Infiltrating duct carcinoma, NOS	no	No	not reported	Head of pancreas	No	Head of pancreas	not reported	'--	yes	Pharmaceutical Therapy, NOS
TCGA-FB-AAPZ	54	-19847	'--	not hispanic or latino	male	white	Alive	1954	19847	MX	N1	Stage IIB	T2	7th	not reported	0	716	not reported	8500-03-01	Infiltrating duct carcinoma, NOS	no	No	not reported	Head of pancreas	No	Head of pancreas	not reported	2008	yes	Pharmaceutical Therapy, NOS
TCGA-FB-AAPZ	54	-19847	'--	not hispanic or latino	male	white	Alive	1954	19847	MX	N1	Stage IIB	T2	7th	not reported	0	716	not reported	8500-03-01	Infiltrating duct carcinoma, NOS	no	No	not reported	Head of pancreas	No	Head of pancreas	not reported	2008	no	Radiation Therapy, NOS
TCGA-FB-AAQ2	81	-29585	153	not hispanic or latino	female	white	Dead	1930	29585	MX	N1	Stage IIB	T3	7th	not reported	0	'--	not reported	8500-03-01	Infiltrating duct carcinoma, NOS	no	No	not reported	Head of pancreas	No	Head of pancreas	not reported	2011	no	Pharmaceutical Therapy, NOS
TCGA-FB-AAQ2	81	-29585	153	not hispanic or latino	female	white	Dead	1930	29585	MX	N1	Stage IIB	T3	7th	not reported	0	'--	not reported	8500-03-01	Infiltrating duct carcinoma, NOS	no	No	not reported	Head of pancreas	No	Head of pancreas	not reported	2011	no	Radiation Therapy, NOS
TCGA-IB-7886	80	-29319	123	not hispanic or latino	male	white	Dead	1930	29319	M0	N1	Stage IIB	T3	7th	not reported	0	'--	not reported	8500-03-01	Infiltrating duct carcinoma, NOS	no	No	not reported	Pancreas, NOS	No	Pancreas, NOS	not reported	2010	no	Radiation Therapy, NOS
TCGA-IB-7886	80	-29319	123	not hispanic or latino	male	white	Dead	1930	29319	M0	N1	Stage IIB	T3	7th	not reported	0	'--	not reported	8500-03-01	Infiltrating duct carcinoma, NOS	no	No	not reported	Pancreas, NOS	No	Pancreas, NOS	not reported	2010	no	Pharmaceutical Therapy, NOS
TCGA-LB-A8F3	64	-23624	'--	not hispanic or latino	female	black or african american	Alive	1949	23624	MX	N0	Stage IIA	T3	7th	not reported	0	379	not reported	8500-03-01	Infiltrating duct carcinoma, NOS	no	No	not reported	Head of pancreas	No	Head of pancreas	not reported	2013	yes	Pharmaceutical Therapy, NOS
TCGA-LB-A8F3	64	-23624	'--	not hispanic or latino	female	black or african american	Alive	1949	23624	MX	N0	Stage IIA	T3	7th	not reported	0	379	not reported	8500-03-01	Infiltrating duct carcinoma, NOS	no	No	not reported	Head of pancreas	No	Head of pancreas	not reported	2013	yes	Radiation Therapy, NOS
TCGA-XD-AAUG	66	-24291	'--	not hispanic or latino	female	white	Alive	1947	24291	M1	N1	Stage IV	T3	7th	not reported	0	420	not reported	8500-03-01	Infiltrating duct carcinoma, NOS	no	No	not reported	Body of pancreas	No	Body of pancreas	not reported	2013	yes	Pharmaceutical Therapy, NOS
TCGA-XD-AAUG	66	-24291	'--	not hispanic or latino	female	white	Alive	1947	24291	M1	N1	Stage IV	T3	7th	not reported	0	420	not reported	8500-03-01	Infiltrating duct carcinoma, NOS	no	No	not reported	Body of pancreas	No	Body of pancreas	not reported	2013	no	Radiation Therapy, NOS
TCGA-HZ-7925	66	-24150	614	not hispanic or latino	male	white	Dead	1945	24150	MX	N1	Stage IIB	T3	7th	not reported	0	361	not reported	8500-03-01	Infiltrating duct carcinoma, NOS	no	No	not reported	Head of pancreas	No	Head of pancreas	not reported	2011	yes	Pharmaceutical Therapy, NOS
TCGA-HZ-7925	66	-24150	614	not hispanic or latino	male	white	Dead	1945	24150	MX	N1	Stage IIB	T3	7th	not reported	0	361	not reported	8500-03-01	Infiltrating duct carcinoma, NOS	no	No	not reported	Head of pancreas	No	Head of pancreas	not reported	2011	no	Radiation Therapy, NOS
TCGA-2L-AAQJ	49	-18103	394	not reported	female	white	Dead	1961	18103	MX	N0	Stage III	T4	7th	not reported	0	'--	not reported	8500-03-01	Infiltrating duct carcinoma, NOS	no	No	not reported	Head of pancreas	No	Head of pancreas	not reported	2010	yes	Pharmaceutical Therapy, NOS
TCGA-2L-AAQJ	49	-18103	394	not reported	female	white	Dead	1961	18103	MX	N0	Stage III	T4	7th	not reported	0	'--	not reported	8500-03-01	Infiltrating duct carcinoma, NOS	no	No	not reported	Head of pancreas	No	Head of pancreas	not reported	2010	no	Radiation Therapy, NOS
TCGA-HZ-A77O	77	-28434	160	not hispanic or latino	female	white	Dead	1936	28434	MX	N1	Stage IIB	T2	7th	not reported	0	11	not reported	8500-03-01	Infiltrating duct carcinoma, NOS	no	No	not reported	Head of pancreas	No	Head of pancreas	not reported	2013	no	Radiation Therapy, NOS
TCGA-HZ-A77O	77	-28434	160	not hispanic or latino	female	white	Dead	1936	28434	MX	N1	Stage IIB	T2	7th	not reported	0	11	not reported	8500-03-01	Infiltrating duct carcinoma, NOS	no	No	not reported	Head of pancreas	No	Head of pancreas	not reported	2013	yes	Pharmaceutical Therapy, NOS
TCGA-IB-7887	62	-22990	110	not hispanic or latino	female	white	Dead	1947	22990	M0	N1	Stage IIB	T3	7th	not reported	0	'--	not reported	8500-03-01	Infiltrating duct carcinoma, NOS	no	No	not reported	Pancreas, NOS	No	Pancreas, NOS	not reported	2009	no	Pharmaceutical Therapy, NOS
TCGA-IB-7887	62	-22990	110	not hispanic or latino	female	white	Dead	1947	22990	M0	N1	Stage IIB	T3	7th	not reported	0	'--	not reported	8500-03-01	Infiltrating duct carcinoma, NOS	no	No	not reported	Pancreas, NOS	No	Pancreas, NOS	not reported	2009	no	Radiation Therapy, NOS
TCGA-FZ-5919	59	-21611	741	not hispanic or latino	female	white	Dead	1948	21611	MX	N1	Stage IIB	T3	6th	not reported	0	'--	not reported	8500-03-01	Infiltrating duct carcinoma, NOS	no	No	not reported	Head of pancreas	No	Head of pancreas	not reported	2007	yes	Pharmaceutical Therapy, NOS
TCGA-FZ-5919	59	-21611	741	not hispanic or latino	female	white	Dead	1948	21611	MX	N1	Stage IIB	T3	6th	not reported	0	'--	not reported	8500-03-01	Infiltrating duct carcinoma, NOS	no	No	not reported	Head of pancreas	No	Head of pancreas	not reported	2007	no	Radiation Therapy, NOS
TCGA-FB-AAQ1	49	-18172	123	not hispanic or latino	male	white	Dead	1962	18172	MX	N1	Stage IIB	T3	7th	not reported	0	'--	not reported	8500-03-01	Infiltrating duct carcinoma, NOS	no	No	not reported	Head of pancreas	No	Head of pancreas	not reported	2011	no	Radiation Therapy, NOS
TCGA-FB-AAQ1	49	-18172	123	not hispanic or latino	male	white	Dead	1962	18172	MX	N1	Stage IIB	T3	7th	not reported	0	'--	not reported	8500-03-01	Infiltrating duct carcinoma, NOS	no	No	not reported	Head of pancreas	No	Head of pancreas	not reported	2011	no	Pharmaceutical Therapy, NOS
TCGA-HZ-8005	81	-29674	120	not hispanic or latino	male	white	Dead	1931	29674	MX	N1	Stage IIB	T3	7th	not reported	0	'--	not reported	8500-03-01	Infiltrating duct carcinoma, NOS	no	No	not reported	Pancreas, NOS	No	Pancreas, NOS	not reported	2012	no	Pharmaceutical Therapy, NOS
TCGA-HZ-8005	81	-29674	120	not hispanic or latino	male	white	Dead	1931	29674	MX	N1	Stage IIB	T3	7th	not reported	0	'--	not reported	8500-03-01	Infiltrating duct carcinoma, NOS	no	No	not reported	Pancreas, NOS	No	Pancreas, NOS	not reported	2012	no	Radiation Therapy, NOS
TCGA-2J-AABV	74	-27082	652	not reported	male	white	Dead	1938	27082	M0	N1	Stage IIB	T3	7th	not reported	0	'--	not reported	8500-03-01	Infiltrating duct carcinoma, NOS	no	No	not reported	Head of pancreas	No	Head of pancreas	not reported	2012	yes	Pharmaceutical Therapy, NOS
TCGA-2J-AABV	74	-27082	652	not reported	male	white	Dead	1938	27082	M0	N1	Stage IIB	T3	7th	not reported	0	'--	not reported	8500-03-01	Infiltrating duct carcinoma, NOS	no	No	not reported	Head of pancreas	No	Head of pancreas	not reported	2012	no	Radiation Therapy, NOS
TCGA-Q3-AA2A	64	-23685	'--	not hispanic or latino	female	white	Alive	1949	23685	MX	N1	Stage IB	T3	7th	not reported	0	95	not reported	8500-03-01	Infiltrating duct carcinoma, NOS	no	No	not reported	Head of pancreas	No	Head of pancreas	not reported	2013	no	Radiation Therapy, NOS
TCGA-Q3-AA2A	64	-23685	'--	not hispanic or latino	female	white	Alive	1949	23685	MX	N1	Stage IB	T3	7th	not reported	0	95	not reported	8500-03-01	Infiltrating duct carcinoma, NOS	no	No	not reported	Head of pancreas	No	Head of pancreas	not reported	2013	no	Pharmaceutical Therapy, NOS
TCGA-3A-A9IL	39	-14599	'--	not hispanic or latino	female	white	Alive	1968	14599	MX	'--	Stage I	T1	6th	not reported	0	2741	not reported	8246-03-01	Neuroendocrine carcinoma, NOS	yes	No	not reported	Body of pancreas	No	Body of pancreas	not reported	2007	no	Radiation Therapy, NOS
TCGA-3A-A9IL	39	-14599	'--	not hispanic or latino	female	white	Alive	1968	14599	MX	'--	Stage I	T1	6th	not reported	0	2741	not reported	8246-03-01	Neuroendocrine carcinoma, NOS	yes	No	not reported	Body of pancreas	No	Body of pancreas	not reported	2007	no	Pharmaceutical Therapy, NOS
TCGA-2J-AABI	55	-20316	'--	not reported	female	white	Alive	1956	20316	M0	N0	Stage IIA	T3	7th	not reported	0	969	not reported	8140-03-01	Adenocarcinoma, NOS	no	No	not reported	Head of pancreas	No	Head of pancreas	not reported	2011	yes	Pharmaceutical Therapy, NOS
TCGA-2J-AABI	55	-20316	'--	not reported	female	white	Alive	1956	20316	M0	N0	Stage IIA	T3	7th	not reported	0	969	not reported	8140-03-01	Adenocarcinoma, NOS	no	No	not reported	Head of pancreas	No	Head of pancreas	not reported	2011	yes	Radiation Therapy, NOS
TCGA-FB-A78T	71	-26179	375	not hispanic or latino	female	white	Dead	1942	26179	M0	N1	Stage IIB	T3	7th	not reported	0	1	not reported	8500-03-01	Infiltrating duct carcinoma, NOS	no	No	not reported	Head of pancreas	No	Head of pancreas	not reported	2013	yes	Pharmaceutical Therapy, NOS
TCGA-FB-A78T	71	-26179	375	not hispanic or latino	female	white	Dead	1942	26179	M0	N1	Stage IIB	T3	7th	not reported	0	1	not reported	8500-03-01	Infiltrating duct carcinoma, NOS	no	No	not reported	Head of pancreas	No	Head of pancreas	not reported	2013	no	Radiation Therapy, NOS
TCGA-HZ-7926	57	-21024	518	not hispanic or latino	male	black or african american	Dead	1954	21024	MX	N1	Stage IIB	T3	7th	not reported	0	8	not reported	8500-03-01	Infiltrating duct carcinoma, NOS	no	No	not reported	Head of pancreas	No	Head of pancreas	not reported	2011	not reported	Radiation Therapy, NOS
TCGA-HZ-7926	57	-21024	518	not hispanic or latino	male	black or african american	Dead	1954	21024	MX	N1	Stage IIB	T3	7th	not reported	0	8	not reported	8500-03-01	Infiltrating duct carcinoma, NOS	no	No	not reported	Head of pancreas	No	Head of pancreas	not reported	2011	yes	Pharmaceutical Therapy, NOS
TCGA-HZ-A4BH	75	-27637	'--	not reported	male	white	Alive	1936	27637	MX	N1b	Stage IIB	T3	7th	not reported	0	194	not reported	8500-03-01	Infiltrating duct carcinoma, NOS	no	No	not reported	Head of pancreas	No	Head of pancreas	not reported	2011	not reported	Pharmaceutical Therapy, NOS
TCGA-HZ-A4BH	75	-27637	'--	not reported	male	white	Alive	1936	27637	MX	N1b	Stage IIB	T3	7th	not reported	0	194	not reported	8500-03-01	Infiltrating duct carcinoma, NOS	no	No	not reported	Head of pancreas	No	Head of pancreas	not reported	2011	not reported	Radiation Therapy, NOS
TCGA-HV-A7OL	70	-25768	'--	not reported	male	asian	Alive	1942	25768	MX	N0	Stage IIA	T3	7th	not reported	0	252	not reported	8500-03-01	Infiltrating duct carcinoma, NOS	no	No	not reported	Head of pancreas	No	Head of pancreas	not reported	2012	no	Radiation Therapy, NOS
TCGA-HV-A7OL	70	-25768	'--	not reported	male	asian	Alive	1942	25768	MX	N0	Stage IIA	T3	7th	not reported	0	252	not reported	8500-03-01	Infiltrating duct carcinoma, NOS	no	No	not reported	Head of pancreas	No	Head of pancreas	not reported	2012	no	Pharmaceutical Therapy, NOS
TCGA-2J-AAB8	71	-26028	'--	not reported	male	white	Alive	1941	26028	M0	N1	Stage IIB	T3	7th	not reported	0	80	not reported	8500-03-01	Infiltrating duct carcinoma, NOS	no	No	not reported	Head of pancreas	No	Head of pancreas	not reported	2012	not reported	Radiation Therapy, NOS
TCGA-2J-AAB8	71	-26028	'--	not reported	male	white	Alive	1941	26028	M0	N1	Stage IIB	T3	7th	not reported	0	80	not reported	8500-03-01	Infiltrating duct carcinoma, NOS	no	No	not reported	Head of pancreas	No	Head of pancreas	not reported	2012	yes	Pharmaceutical Therapy, NOS
TCGA-HZ-7919	52	-19064	593	not hispanic or latino	female	white	Dead	1959	19064	M0	N1	Stage IIB	T3	7th	not reported	0	20	not reported	8500-03-01	Infiltrating duct carcinoma, NOS	no	No	not reported	Head of pancreas	No	Head of pancreas	not reported	2011	not reported	Pharmaceutical Therapy, NOS
TCGA-HZ-7919	52	-19064	593	not hispanic or latino	female	white	Dead	1959	19064	M0	N1	Stage IIB	T3	7th	not reported	0	20	not reported	8500-03-01	Infiltrating duct carcinoma, NOS	no	No	not reported	Head of pancreas	No	Head of pancreas	not reported	2011	not reported	Radiation Therapy, NOS
TCGA-IB-A5SS	64	-23431	460	not hispanic or latino	female	white	Dead	1947	23431	M0	N1	Stage IIB	T3	7th	not reported	0	'--	not reported	8500-03-01	Infiltrating duct carcinoma, NOS	yes	No	not reported	Tail of pancreas	No	Tail of pancreas	not reported	2011	yes	Pharmaceutical Therapy, NOS
TCGA-IB-A5SS	64	-23431	460	not hispanic or latino	female	white	Dead	1947	23431	M0	N1	Stage IIB	T3	7th	not reported	0	'--	not reported	8500-03-01	Infiltrating duct carcinoma, NOS	yes	No	not reported	Tail of pancreas	No	Tail of pancreas	not reported	2011	no	Radiation Therapy, NOS
TCGA-LB-A9Q5	63	-23218	313	not hispanic or latino	female	white	Dead	1950	23218	MX	N1	Stage IIB	T3	7th	not reported	0	155	not reported	8500-03-01	Infiltrating duct carcinoma, NOS	no	No	not reported	Head of pancreas	No	Head of pancreas	not reported	2013	yes	Pharmaceutical Therapy, NOS
TCGA-LB-A9Q5	63	-23218	313	not hispanic or latino	female	white	Dead	1950	23218	MX	N1	Stage IIB	T3	7th	not reported	0	155	not reported	8500-03-01	Infiltrating duct carcinoma, NOS	no	No	not reported	Head of pancreas	No	Head of pancreas	not reported	2013	yes	Radiation Therapy, NOS
TCGA-IB-7889	85	-31393	481	not hispanic or latino	female	white	Dead	1926	31393	M0	N1	Stage IIB	T3	7th	not reported	0	'--	not reported	8500-03-01	Infiltrating duct carcinoma, NOS	no	No	not reported	Pancreas, NOS	No	Pancreas, NOS	not reported	2011	yes	Pharmaceutical Therapy, NOS
TCGA-IB-7889	85	-31393	481	not hispanic or latino	female	white	Dead	1926	31393	M0	N1	Stage IIB	T3	7th	not reported	0	'--	not reported	8500-03-01	Infiltrating duct carcinoma, NOS	no	No	not reported	Pancreas, NOS	No	Pancreas, NOS	not reported	2011	no	Radiation Therapy, NOS
TCGA-HV-A5A4	72	-26311	'--	not reported	female	asian	Alive	1940	26311	MX	N0	Stage IIA	T3	7th	not reported	0	232	not reported	8500-03-01	Infiltrating duct carcinoma, NOS	no	No	not reported	Tail of pancreas	No	Tail of pancreas	not reported	2012	yes	Pharmaceutical Therapy, NOS
TCGA-HV-A5A4	72	-26311	'--	not reported	female	asian	Alive	1940	26311	MX	N0	Stage IIA	T3	7th	not reported	0	232	not reported	8500-03-01	Infiltrating duct carcinoma, NOS	no	No	not reported	Tail of pancreas	No	Tail of pancreas	not reported	2012	no	Radiation Therapy, NOS
TCGA-2J-AAB4	48	-17794	'--	not reported	male	white	Alive	1964	17794	M0	N1	Stage IIB	T2	7th	not reported	0	729	not reported	8140-03-01	Adenocarcinoma, NOS	no	No	not reported	Overlapping lesion of pancreas	No	Overlapping lesion of pancreas	not reported	2012	no	Radiation Therapy, NOS
TCGA-2J-AAB4	48	-17794	'--	not reported	male	white	Alive	1964	17794	M0	N1	Stage IIB	T2	7th	not reported	0	729	not reported	8140-03-01	Adenocarcinoma, NOS	no	No	not reported	Overlapping lesion of pancreas	No	Overlapping lesion of pancreas	not reported	2012	yes	Pharmaceutical Therapy, NOS
TCGA-FZ-5921	85	-31074	155	not reported	female	not reported	Dead	1922	31074	M0	N1	Stage IIB	T3	6th	not reported	0	'--	not reported	8500-03-01	Infiltrating duct carcinoma, NOS	no	No	not reported	Head of pancreas	No	Head of pancreas	not reported	2007	no	Pharmaceutical Therapy, NOS
TCGA-FZ-5921	85	-31074	155	not reported	female	not reported	Dead	1922	31074	M0	N1	Stage IIB	T3	6th	not reported	0	'--	not reported	8500-03-01	Infiltrating duct carcinoma, NOS	no	No	not reported	Head of pancreas	No	Head of pancreas	not reported	2007	yes	Radiation Therapy, NOS
TCGA-IB-7651	64	-23580	603	not hispanic or latino	female	white	Dead	1945	23580	M0	N1	Stage IIB	T3	6th	not reported	0	'--	not reported	8500-03-01	Infiltrating duct carcinoma, NOS	no	No	not reported	Head of pancreas	No	Head of pancreas	not reported	2009	no	Radiation Therapy, NOS
TCGA-IB-7651	64	-23580	603	not hispanic or latino	female	white	Dead	1945	23580	M0	N1	Stage IIB	T3	6th	not reported	0	'--	not reported	8500-03-01	Infiltrating duct carcinoma, NOS	no	No	not reported	Head of pancreas	No	Head of pancreas	not reported	2009	yes	Pharmaceutical Therapy, NOS
TCGA-XN-A8T5	53	-19707	'--	hispanic or latino	female	white	Alive	1959	19707	M0	N0	Stage IB	T2	7th	not reported	0	720	not reported	8500-03-01	Infiltrating duct carcinoma, NOS	no	No	not reported	Head of pancreas	No	Head of pancreas	not reported	2012	yes	Radiation Therapy, NOS
TCGA-XN-A8T5	53	-19707	'--	hispanic or latino	female	white	Alive	1959	19707	M0	N0	Stage IB	T2	7th	not reported	0	720	not reported	8500-03-01	Infiltrating duct carcinoma, NOS	no	No	not reported	Head of pancreas	No	Head of pancreas	not reported	2012	yes	Pharmaceutical Therapy, NOS
TCGA-3A-A9I9	67	-24731	634	not hispanic or latino	male	white	Dead	1944	24731	MX	N0	Stage IIA	T3	7th	not reported	0	'--	not reported	8500-03-01	Infiltrating duct carcinoma, NOS	no	No	not reported	Head of pancreas	No	Head of pancreas	not reported	2011	yes	Radiation Therapy, NOS
TCGA-3A-A9I9	67	-24731	634	not hispanic or latino	male	white	Dead	1944	24731	MX	N0	Stage IIA	T3	7th	not reported	0	'--	not reported	8500-03-01	Infiltrating duct carcinoma, NOS	no	No	not reported	Head of pancreas	No	Head of pancreas	not reported	2011	yes	Pharmaceutical Therapy, NOS
TCGA-US-A77J	81	-29904	568	not hispanic or latino	female	white	Dead	1929	29904	MX	N1b	Stage IIB	T3	7th	not reported	0	'--	not reported	8500-03-01	Infiltrating duct carcinoma, NOS	no	No	not reported	Head of pancreas	No	Head of pancreas	not reported	2010	not reported	Pharmaceutical Therapy, NOS
TCGA-US-A77J	81	-29904	568	not hispanic or latino	female	white	Dead	1929	29904	MX	N1b	Stage IIB	T3	7th	not reported	0	'--	not reported	8500-03-01	Infiltrating duct carcinoma, NOS	no	No	not reported	Head of pancreas	No	Head of pancreas	not reported	2010	not reported	Radiation Therapy, NOS
TCGA-3A-A9IB	69	-25312	224	not hispanic or latino	female	white	Dead	1942	25312	MX	N1	Stage IIB	T3	7th	not reported	0	'--	not reported	8500-03-01	Infiltrating duct carcinoma, NOS	no	No	not reported	Head of pancreas	No	Head of pancreas	not reported	2011	no	Radiation Therapy, NOS
TCGA-3A-A9IB	69	-25312	224	not hispanic or latino	female	white	Dead	1942	25312	MX	N1	Stage IIB	T3	7th	not reported	0	'--	not reported	8500-03-01	Infiltrating duct carcinoma, NOS	no	No	not reported	Head of pancreas	No	Head of pancreas	not reported	2011	no	Pharmaceutical Therapy, NOS
TCGA-H8-A6C1	53	-19677	'--	not hispanic or latino	male	white	Alive	1959	19677	MX	N0	Stage IIA	T3	7th	not reported	0	671	not reported	8140-03-01	Adenocarcinoma, NOS	no	No	not reported	Head of pancreas	No	Head of pancreas	not reported	2012	yes	Pharmaceutical Therapy, NOS
TCGA-H8-A6C1	53	-19677	'--	not hispanic or latino	male	white	Alive	1959	19677	MX	N0	Stage IIA	T3	7th	not reported	0	671	not reported	8140-03-01	Adenocarcinoma, NOS	no	No	not reported	Head of pancreas	No	Head of pancreas	not reported	2012	no	Radiation Therapy, NOS
TCGA-2J-AABT	72	-26379	'--	not reported	female	white	Alive	1940	26379	M0	N1	Stage IIB	T3	7th	not reported	0	319	not reported	8500-03-01	Infiltrating duct carcinoma, NOS	yes	No	not reported	Head of pancreas	No	Head of pancreas	not reported	2012	not reported	Radiation Therapy, NOS
TCGA-2J-AABT	72	-26379	'--	not reported	female	white	Alive	1940	26379	M0	N1	Stage IIB	T3	7th	not reported	0	319	not reported	8500-03-01	Infiltrating duct carcinoma, NOS	yes	No	not reported	Head of pancreas	No	Head of pancreas	not reported	2012	yes	Pharmaceutical Therapy, NOS
TCGA-FB-A5VM	74	-27362	498	not hispanic or latino	male	white	Dead	1938	27362	M0	N0	Stage IB	T2	7th	not reported	0	449	not reported	8500-03-01	Infiltrating duct carcinoma, NOS	no	No	not reported	Head of pancreas	No	Head of pancreas	not reported	2012	no	Radiation Therapy, NOS
TCGA-FB-A5VM	74	-27362	498	not hispanic or latino	male	white	Dead	1938	27362	M0	N0	Stage IB	T2	7th	not reported	0	449	not reported	8500-03-01	Infiltrating duct carcinoma, NOS	no	No	not reported	Head of pancreas	No	Head of pancreas	not reported	2012	yes	Pharmaceutical Therapy, NOS
TCGA-HV-A5A6	65	-24025	2036	not reported	female	asian	Dead	1936	24025	M0	N1b	Stage IIB	T3	7th	not reported	0	1953	not reported	8500-03-01	Infiltrating duct carcinoma, NOS	no	No	not reported	Head of pancreas	No	Head of pancreas	not reported	2001	no	Radiation Therapy, NOS
TCGA-HV-A5A6	65	-24025	2036	not reported	female	asian	Dead	1936	24025	M0	N1b	Stage IIB	T3	7th	not reported	0	1953	not reported	8500-03-01	Infiltrating duct carcinoma, NOS	no	No	not reported	Head of pancreas	No	Head of pancreas	not reported	2001	yes	Pharmaceutical Therapy, NOS
TCGA-IB-8126	79	-29213	'--	not hispanic or latino	female	white	Alive	1932	29213	M0	N1	Stage III	T4	7th	not reported	0	462	not reported	8500-03-01	Infiltrating duct carcinoma, NOS	no	No	not reported	Head of pancreas	No	Head of pancreas	not reported	2011	no	Radiation Therapy, NOS
TCGA-IB-8126	79	-29213	'--	not hispanic or latino	female	white	Alive	1932	29213	M0	N1	Stage III	T4	7th	not reported	0	462	not reported	8500-03-01	Infiltrating duct carcinoma, NOS	no	No	not reported	Head of pancreas	No	Head of pancreas	not reported	2011	yes	Pharmaceutical Therapy, NOS
TCGA-IB-A6UG	65	-23751	41	not hispanic or latino	male	white	Dead	1947	23751	M0	N1	Stage IIB	T3	7th	not reported	0	'--	not reported	8500-03-01	Infiltrating duct carcinoma, NOS	no	No	not reported	Head of pancreas	No	Head of pancreas	not reported	2012	no	Radiation Therapy, NOS
TCGA-IB-A6UG	65	-23751	41	not hispanic or latino	male	white	Dead	1947	23751	M0	N1	Stage IIB	T3	7th	not reported	0	'--	not reported	8500-03-01	Infiltrating duct carcinoma, NOS	no	No	not reported	Head of pancreas	No	Head of pancreas	not reported	2012	no	Pharmaceutical Therapy, NOS
TCGA-HZ-A49G	58	-21491	'--	not hispanic or latino	female	white	Alive	1954	21491	MX	N1	Stage IIB	T2	7th	not reported	0	660	not reported	8500-03-01	Infiltrating duct carcinoma, NOS	no	No	not reported	Head of pancreas	No	Head of pancreas	not reported	2012	yes	Radiation Therapy, NOS
TCGA-HZ-A49G	58	-21491	'--	not hispanic or latino	female	white	Alive	1954	21491	MX	N1	Stage IIB	T2	7th	not reported	0	660	not reported	8500-03-01	Infiltrating duct carcinoma, NOS	no	No	not reported	Head of pancreas	No	Head of pancreas	not reported	2012	yes	Pharmaceutical Therapy, NOS
TCGA-OE-A75W	75	-27684	267	not hispanic or latino	male	white	Dead	1938	27684	M0	N0	Stage IIA	T3	7th	not reported	0	110	not reported	8500-03-01	Infiltrating duct carcinoma, NOS	no	No	not reported	Tail of pancreas	No	Tail of pancreas	not reported	2013	yes	Pharmaceutical Therapy, NOS
TCGA-OE-A75W	75	-27684	267	not hispanic or latino	male	white	Dead	1938	27684	M0	N0	Stage IIA	T3	7th	not reported	0	110	not reported	8500-03-01	Infiltrating duct carcinoma, NOS	no	No	not reported	Tail of pancreas	No	Tail of pancreas	not reported	2013	yes	Radiation Therapy, NOS
TCGA-HZ-8002	61	-22433	366	not hispanic or latino	male	white	Dead	1950	22433	MX	N1	Stage IIB	T3	7th	not reported	0	24	not reported	8500-03-01	Infiltrating duct carcinoma, NOS	no	No	not reported	Head of pancreas	No	Head of pancreas	not reported	2011	yes	Pharmaceutical Therapy, NOS
TCGA-HZ-8002	61	-22433	366	not hispanic or latino	male	white	Dead	1950	22433	MX	N1	Stage IIB	T3	7th	not reported	0	24	not reported	8500-03-01	Infiltrating duct carcinoma, NOS	no	No	not reported	Head of pancreas	No	Head of pancreas	not reported	2011	no	Radiation Therapy, NOS
TCGA-F2-7273	54	-20071	592	not hispanic or latino	male	black or african american	Dead	1957	20071	M0	N1	Stage IIB	T3	7th	not reported	0	360	not reported	8140-03-01	Adenocarcinoma, NOS	no	No	not reported	Pancreas, NOS	No	Pancreas, NOS	not reported	2011	yes	Pharmaceutical Therapy, NOS
TCGA-F2-7273	54	-20071	592	not hispanic or latino	male	black or african american	Dead	1957	20071	M0	N1	Stage IIB	T3	7th	not reported	0	360	not reported	8140-03-01	Adenocarcinoma, NOS	no	No	not reported	Pancreas, NOS	No	Pancreas, NOS	not reported	2011	yes	Radiation Therapy, NOS
TCGA-IB-A5SQ	56	-20760	219	not hispanic or latino	female	white	Dead	1956	20760	M0	N0	Stage IB	T2	7th	not reported	0	'--	not reported	8500-03-01	Infiltrating duct carcinoma, NOS	no	No	not reported	Head of pancreas	No	Head of pancreas	not reported	2012	no	Pharmaceutical Therapy, NOS
TCGA-IB-A5SQ	56	-20760	219	not hispanic or latino	female	white	Dead	1956	20760	M0	N0	Stage IB	T2	7th	not reported	0	'--	not reported	8500-03-01	Infiltrating duct carcinoma, NOS	no	No	not reported	Head of pancreas	No	Head of pancreas	not reported	2012	no	Radiation Therapy, NOS
TCGA-FZ-5924	83	-30571	480	not hispanic or latino	male	white	Dead	1925	30571	M0	N1	Stage IIA	T3	6th	not reported	0	'--	not reported	8500-03-01	Infiltrating duct carcinoma, NOS	yes	No	not reported	Head of pancreas	No	Head of pancreas	not reported	2008	no	Radiation Therapy, NOS
TCGA-FZ-5924	83	-30571	480	not hispanic or latino	male	white	Dead	1925	30571	M0	N1	Stage IIA	T3	6th	not reported	0	'--	not reported	8500-03-01	Infiltrating duct carcinoma, NOS	yes	No	not reported	Head of pancreas	No	Head of pancreas	not reported	2008	yes	Pharmaceutical Therapy, NOS
TCGA-YH-A8SY	73	-26859	'--	not hispanic or latino	female	white	Alive	1938	26859	MX	N1	'--	T3	7th	not reported	0	388	not reported	8140-03-01	Adenocarcinoma, NOS	no	No	not reported	Head of pancreas	No	Head of pancreas	not reported	2011	yes	Pharmaceutical Therapy, NOS
TCGA-YH-A8SY	73	-26859	'--	not hispanic or latino	female	white	Alive	1938	26859	MX	N1	'--	T3	7th	not reported	0	388	not reported	8140-03-01	Adenocarcinoma, NOS	no	No	not reported	Head of pancreas	No	Head of pancreas	not reported	2011	yes	Radiation Therapy, NOS
TCGA-2J-AABR	60	-22131	'--	not reported	female	white	Alive	1953	22131	M0	N0	Stage IIA	T3	7th	not reported	0	438	not reported	8500-03-01	Infiltrating duct carcinoma, NOS	yes	No	not reported	Overlapping lesion of pancreas	No	Overlapping lesion of pancreas	not reported	2013	yes	Pharmaceutical Therapy, NOS
TCGA-2J-AABR	60	-22131	'--	not reported	female	white	Alive	1953	22131	M0	N0	Stage IIA	T3	7th	not reported	0	438	not reported	8500-03-01	Infiltrating duct carcinoma, NOS	yes	No	not reported	Overlapping lesion of pancreas	No	Overlapping lesion of pancreas	not reported	2013	yes	Radiation Therapy, NOS
TCGA-HZ-A4BK	72	-26503	'--	not hispanic or latino	male	white	Alive	1940	26503	MX	N1	Stage IIB	T3	7th	not reported	0	657	not reported	8140-03-01	Adenocarcinoma, NOS	yes	No	not reported	Head of pancreas	No	Head of pancreas	not reported	2012	yes	Radiation Therapy, NOS
TCGA-HZ-A4BK	72	-26503	'--	not hispanic or latino	male	white	Alive	1940	26503	MX	N1	Stage IIB	T3	7th	not reported	0	657	not reported	8140-03-01	Adenocarcinoma, NOS	yes	No	not reported	Head of pancreas	No	Head of pancreas	not reported	2012	yes	Pharmaceutical Therapy, NOS
TCGA-3A-A9IZ	47	-17294	308	hispanic or latino	male	white	Dead	1965	17294	MX	N1	Stage IIB	T3	7th	not reported	0	'--	not reported	8500-03-01	Infiltrating duct carcinoma, NOS	no	No	not reported	Head of pancreas	No	Head of pancreas	not reported	2012	no	Radiation Therapy, NOS
TCGA-3A-A9IZ	47	-17294	308	hispanic or latino	male	white	Dead	1965	17294	MX	N1	Stage IIB	T3	7th	not reported	0	'--	not reported	8500-03-01	Infiltrating duct carcinoma, NOS	no	No	not reported	Head of pancreas	No	Head of pancreas	not reported	2012	yes	Pharmaceutical Therapy, NOS
TCGA-US-A779	54	-20051	511	not hispanic or latino	female	white	Dead	1957	20051	MX	N1b	Stage IIB	T3	7th	not reported	0	'--	not reported	8500-03-01	Infiltrating duct carcinoma, NOS	no	No	not reported	Head of pancreas	No	Head of pancreas	not reported	2011	not reported	Pharmaceutical Therapy, NOS
TCGA-US-A779	54	-20051	511	not hispanic or latino	female	white	Dead	1957	20051	MX	N1b	Stage IIB	T3	7th	not reported	0	'--	not reported	8500-03-01	Infiltrating duct carcinoma, NOS	no	No	not reported	Head of pancreas	No	Head of pancreas	not reported	2011	not reported	Radiation Therapy, NOS
TCGA-IB-7890	73	-26747	598	not reported	male	not reported	Dead	1935	26747	M0	N0	Stage IB	T2	6th	not reported	0	'--	not reported	8500-03-01	Infiltrating duct carcinoma, NOS	no	No	not reported	Pancreas, NOS	No	Pancreas, NOS	not reported	2008	no	Pharmaceutical Therapy, NOS
TCGA-IB-7890	73	-26747	598	not reported	male	not reported	Dead	1935	26747	M0	N0	Stage IB	T2	6th	not reported	0	'--	not reported	8500-03-01	Infiltrating duct carcinoma, NOS	no	No	not reported	Pancreas, NOS	No	Pancreas, NOS	not reported	2008	no	Radiation Therapy, NOS
TCGA-3A-A9I7	45	-16766	'--	not hispanic or latino	male	black or african american	Alive	1965	16766	MX	N1	Stage IIB	T3	7th	not reported	0	1323	not reported	8500-03-01	Infiltrating duct carcinoma, NOS	no	No	not reported	Head of pancreas	No	Head of pancreas	not reported	2010	yes	Pharmaceutical Therapy, NOS
TCGA-3A-A9I7	45	-16766	'--	not hispanic or latino	male	black or african american	Alive	1965	16766	MX	N1	Stage IIB	T3	7th	not reported	0	1323	not reported	8500-03-01	Infiltrating duct carcinoma, NOS	no	No	not reported	Head of pancreas	No	Head of pancreas	not reported	2010	yes	Radiation Therapy, NOS
TCGA-HZ-8001	69	-25227	'--	not hispanic or latino	male	white	Alive	1942	25227	MX	N0	Stage III	T4	7th	not reported	0	706	not reported	8500-03-01	Infiltrating duct carcinoma, NOS	no	No	not reported	Head of pancreas	No	Head of pancreas	not reported	2011	yes	Pharmaceutical Therapy, NOS
TCGA-HZ-8001	69	-25227	'--	not hispanic or latino	male	white	Alive	1942	25227	MX	N0	Stage III	T4	7th	not reported	0	706	not reported	8500-03-01	Infiltrating duct carcinoma, NOS	no	No	not reported	Head of pancreas	No	Head of pancreas	not reported	2011	no	Radiation Therapy, NOS
TCGA-HZ-7923	65	-23760	'--	not hispanic or latino	male	white	Alive	1946	23760	MX	N0	Stage IIA	T3	7th	not reported	0	314	not reported	8500-03-01	Infiltrating duct carcinoma, NOS	no	No	not reported	Head of pancreas	No	Head of pancreas	not reported	2011	no	Radiation Therapy, NOS
TCGA-HZ-7923	65	-23760	'--	not hispanic or latino	male	white	Alive	1946	23760	MX	N0	Stage IIA	T3	7th	not reported	0	314	not reported	8500-03-01	Infiltrating duct carcinoma, NOS	no	No	not reported	Head of pancreas	No	Head of pancreas	not reported	2011	yes	Pharmaceutical Therapy, NOS
TCGA-IB-A6UF	63	-23152	'--	not hispanic or latino	male	white	Alive	1949	23152	M0	N1	Stage IIB	T3	7th	not reported	0	666	not reported	8500-03-01	Infiltrating duct carcinoma, NOS	no	No	not reported	Head of pancreas	No	Head of pancreas	not reported	2012	no	Radiation Therapy, NOS
TCGA-IB-A6UF	63	-23152	'--	not hispanic or latino	male	white	Alive	1949	23152	M0	N1	Stage IIB	T3	7th	not reported	0	666	not reported	8500-03-01	Infiltrating duct carcinoma, NOS	no	No	not reported	Head of pancreas	No	Head of pancreas	not reported	2012	yes	Pharmaceutical Therapy, NOS
TCGA-F2-A44H	65	-24007	'--	not hispanic or latino	male	white	Alive	1947	24007	M0	N0	Stage IIA	T3	7th	not reported	0	586	not reported	8140-03-01	Adenocarcinoma, NOS	no	No	not reported	Head of pancreas	No	Head of pancreas	not reported	2012	yes	Radiation Therapy, NOS
TCGA-F2-A44H	65	-24007	'--	not hispanic or latino	male	white	Alive	1947	24007	M0	N0	Stage IIA	T3	7th	not reported	0	586	not reported	8140-03-01	Adenocarcinoma, NOS	no	No	not reported	Head of pancreas	No	Head of pancreas	not reported	2012	yes	Pharmaceutical Therapy, NOS
TCGA-LB-A7SX	74	-27295	393	not hispanic or latino	female	black or african american	Dead	1939	27295	MX	N1	Stage IIB	T3	7th	not reported	0	127	not reported	8500-03-01	Infiltrating duct carcinoma, NOS	yes	No	not reported	Head of pancreas	No	Head of pancreas	not reported	2013	yes	Pharmaceutical Therapy, NOS
TCGA-LB-A7SX	74	-27295	393	not hispanic or latino	female	black or african american	Dead	1939	27295	MX	N1	Stage IIB	T3	7th	not reported	0	127	not reported	8500-03-01	Infiltrating duct carcinoma, NOS	yes	No	not reported	Head of pancreas	No	Head of pancreas	not reported	2013	no	Radiation Therapy, NOS
TCGA-3A-A9IR	64	-23406	'--	not hispanic or latino	female	white	Alive	1946	23406	MX	N0	Stage IB	T2	7th	not reported	0	1542	not reported	8246-03-01	Neuroendocrine carcinoma, NOS	no	No	not reported	Tail of pancreas	No	Tail of pancreas	not reported	2010	no	Pharmaceutical Therapy, NOS
TCGA-3A-A9IR	64	-23406	'--	not hispanic or latino	female	white	Alive	1946	23406	MX	N0	Stage IB	T2	7th	not reported	0	1542	not reported	8246-03-01	Neuroendocrine carcinoma, NOS	no	No	not reported	Tail of pancreas	No	Tail of pancreas	not reported	2010	no	Radiation Therapy, NOS
TCGA-2J-AABE	73	-26943	'--	not reported	male	white	Alive	1939	26943	M0	N0	Stage IIA	T3	7th	not reported	0	676	not reported	8500-03-01	Infiltrating duct carcinoma, NOS	no	No	not reported	Body of pancreas	No	Body of pancreas	not reported	2012	yes	Radiation Therapy, NOS
TCGA-2J-AABE	73	-26943	'--	not reported	male	white	Alive	1939	26943	M0	N0	Stage IIA	T3	7th	not reported	0	676	not reported	8500-03-01	Infiltrating duct carcinoma, NOS	no	No	not reported	Body of pancreas	No	Body of pancreas	not reported	2012	yes	Pharmaceutical Therapy, NOS
TCGA-FB-AAQ3	65	-23953	31	not hispanic or latino	female	white	Dead	1945	23953	MX	N1	Stage IIB	T3	7th	not reported	0	'--	not reported	8500-03-01	Infiltrating duct carcinoma, NOS	no	No	not reported	Head of pancreas	No	Head of pancreas	not reported	2010	no	Pharmaceutical Therapy, NOS
TCGA-FB-AAQ3	65	-23953	31	not hispanic or latino	female	white	Dead	1945	23953	MX	N1	Stage IIB	T3	7th	not reported	0	'--	not reported	8500-03-01	Infiltrating duct carcinoma, NOS	no	No	not reported	Head of pancreas	No	Head of pancreas	not reported	2010	no	Radiation Therapy, NOS
TCGA-HZ-A77P	77	-28403	'--	not hispanic or latino	male	white	Alive	1936	28403	MX	N1	Stage IIB	T3	7th	not reported	0	330	not reported	8140-03-01	Adenocarcinoma, NOS	no	No	not reported	Head of pancreas	No	Head of pancreas	not reported	2013	yes	Pharmaceutical Therapy, NOS
TCGA-HZ-A77P	77	-28403	'--	not hispanic or latino	male	white	Alive	1936	28403	MX	N1	Stage IIB	T3	7th	not reported	0	330	not reported	8140-03-01	Adenocarcinoma, NOS	no	No	not reported	Head of pancreas	No	Head of pancreas	not reported	2013	no	Radiation Therapy, NOS
TCGA-XD-AAUL	56	-20607	'--	not hispanic or latino	male	white	Alive	1957	20607	MX	N0	Stage IIA	T3	7th	not reported	0	498	not reported	8500-03-01	Infiltrating duct carcinoma, NOS	yes	No	not reported	Head of pancreas	No	Head of pancreas	not reported	2013	yes	Pharmaceutical Therapy, NOS
TCGA-XD-AAUL	56	-20607	'--	not hispanic or latino	male	white	Alive	1957	20607	MX	N0	Stage IIA	T3	7th	not reported	0	498	not reported	8500-03-01	Infiltrating duct carcinoma, NOS	yes	No	not reported	Head of pancreas	No	Head of pancreas	not reported	2013	no	Radiation Therapy, NOS
TCGA-US-A77E	73	-26745	430	not hispanic or latino	male	white	Dead	1939	26745	MX	N1	Stage IIB	T3	7th	not reported	0	'--	not reported	8140-03-01	Adenocarcinoma, NOS	yes	No	not reported	Head of pancreas	No	Head of pancreas	not reported	2012	no	Pharmaceutical Therapy, NOS
TCGA-US-A77E	73	-26745	430	not hispanic or latino	male	white	Dead	1939	26745	MX	N1	Stage IIB	T3	7th	not reported	0	'--	not reported	8140-03-01	Adenocarcinoma, NOS	yes	No	not reported	Head of pancreas	No	Head of pancreas	not reported	2012	no	Radiation Therapy, NOS
TCGA-IB-7897	53	-19718	486	not hispanic or latino	female	white	Dead	1955	19718	M0	N1	Stage IIB	T3	6th	not reported	0	'--	not reported	8500-03-01	Infiltrating duct carcinoma, NOS	no	No	not reported	Pancreas, NOS	No	Pancreas, NOS	not reported	2008	no	Pharmaceutical Therapy, NOS
TCGA-IB-7897	53	-19718	486	not hispanic or latino	female	white	Dead	1955	19718	M0	N1	Stage IIB	T3	6th	not reported	0	'--	not reported	8500-03-01	Infiltrating duct carcinoma, NOS	no	No	not reported	Pancreas, NOS	No	Pancreas, NOS	not reported	2008	no	Radiation Therapy, NOS
TCGA-HZ-8315	54	-19839	299	not hispanic or latino	female	white	Dead	1958	19839	MX	N0	Stage IIA	T3	7th	not reported	0	28	not reported	8500-03-01	Infiltrating duct carcinoma, NOS	no	No	not reported	Head of pancreas	No	Head of pancreas	not reported	2012	yes	Pharmaceutical Therapy, NOS
TCGA-HZ-8315	54	-19839	299	not hispanic or latino	female	white	Dead	1958	19839	MX	N0	Stage IIA	T3	7th	not reported	0	28	not reported	8500-03-01	Infiltrating duct carcinoma, NOS	no	No	not reported	Head of pancreas	No	Head of pancreas	not reported	2012	not reported	Radiation Therapy, NOS
TCGA-HZ-8636	58	-21501	545	not hispanic or latino	female	white	Dead	1954	21501	M1	N0	Stage IV	T3	7th	not reported	0	5	not reported	8500-03-01	Infiltrating duct carcinoma, NOS	no	No	not reported	Tail of pancreas	No	Tail of pancreas	not reported	2012	yes	Pharmaceutical Therapy, NOS
TCGA-HZ-8636	58	-21501	545	not hispanic or latino	female	white	Dead	1954	21501	M1	N0	Stage IV	T3	7th	not reported	0	5	not reported	8500-03-01	Infiltrating duct carcinoma, NOS	no	No	not reported	Tail of pancreas	No	Tail of pancreas	not reported	2012	not reported	Radiation Therapy, NOS
TCGA-IB-7888	66	-24117	1332	not hispanic or latino	female	black or african american	Dead	1942	24117	M0	N0	Stage IIA	T3	6th	not reported	0	'--	not reported	8500-03-01	Infiltrating duct carcinoma, NOS	no	No	not reported	Pancreas, NOS	No	Pancreas, NOS	not reported	2008	yes	Pharmaceutical Therapy, NOS
TCGA-IB-7888	66	-24117	1332	not hispanic or latino	female	black or african american	Dead	1942	24117	M0	N0	Stage IIA	T3	6th	not reported	0	'--	not reported	8500-03-01	Infiltrating duct carcinoma, NOS	no	No	not reported	Pancreas, NOS	No	Pancreas, NOS	not reported	2008	yes	Radiation Therapy, NOS
TCGA-IB-7893	64	-23703	117	not hispanic or latino	male	white	Dead	1945	23703	M0	N0	Stage IIA	T3	6th	not reported	0	'--	not reported	8500-03-01	Infiltrating duct carcinoma, NOS	no	No	not reported	Pancreas, NOS	No	Pancreas, NOS	not reported	2009	no	Radiation Therapy, NOS
TCGA-IB-7893	64	-23703	117	not hispanic or latino	male	white	Dead	1945	23703	M0	N0	Stage IIA	T3	6th	not reported	0	'--	not reported	8500-03-01	Infiltrating duct carcinoma, NOS	no	No	not reported	Pancreas, NOS	No	Pancreas, NOS	not reported	2009	no	Pharmaceutical Therapy, NOS
TCGA-US-A774	76	-27957	695	not hispanic or latino	female	white	Dead	1935	27957	MX	N1	Stage IIB	T3	7th	not reported	0	'--	not reported	8500-03-01	Infiltrating duct carcinoma, NOS	no	No	not reported	Head of pancreas	No	Head of pancreas	not reported	2011	yes	Pharmaceutical Therapy, NOS
TCGA-US-A774	76	-27957	695	not hispanic or latino	female	white	Dead	1935	27957	MX	N1	Stage IIB	T3	7th	not reported	0	'--	not reported	8500-03-01	Infiltrating duct carcinoma, NOS	no	No	not reported	Head of pancreas	No	Head of pancreas	not reported	2011	no	Radiation Therapy, NOS
TCGA-IB-AAUP	68	-24864	'--	not hispanic or latino	male	white	Alive	1945	24864	M0	N1	Stage IIB	T3	7th	not reported	0	431	not reported	8500-03-01	Infiltrating duct carcinoma, NOS	no	No	not reported	Head of pancreas	No	Head of pancreas	not reported	2013	yes	Pharmaceutical Therapy, NOS
TCGA-IB-AAUP	68	-24864	'--	not hispanic or latino	male	white	Alive	1945	24864	M0	N1	Stage IIB	T3	7th	not reported	0	431	not reported	8500-03-01	Infiltrating duct carcinoma, NOS	no	No	not reported	Head of pancreas	No	Head of pancreas	not reported	2013	no	Radiation Therapy, NOS
TCGA-IB-8127	59	-21676	'--	not hispanic or latino	male	white	Alive	1952	21676	M0	N1	Stage IIB	T3	7th	not reported	0	522	not reported	8500-03-01	Infiltrating duct carcinoma, NOS	no	No	not reported	Head of pancreas	No	Head of pancreas	not reported	2011	yes	Pharmaceutical Therapy, NOS
TCGA-IB-8127	59	-21676	'--	not hispanic or latino	male	white	Alive	1952	21676	M0	N1	Stage IIB	T3	7th	not reported	0	522	not reported	8500-03-01	Infiltrating duct carcinoma, NOS	no	No	not reported	Head of pancreas	No	Head of pancreas	not reported	2011	no	Radiation Therapy, NOS
TCGA-2J-AABU	56	-20641	277	not reported	male	white	Dead	1956	20641	M0	N1	Stage IIB	T3	7th	not reported	0	'--	not reported	8500-03-01	Infiltrating duct carcinoma, NOS	no	No	not reported	Head of pancreas	No	Head of pancreas	not reported	2012	no	Radiation Therapy, NOS
TCGA-2J-AABU	56	-20641	277	not reported	male	white	Dead	1956	20641	M0	N1	Stage IIB	T3	7th	not reported	0	'--	not reported	8500-03-01	Infiltrating duct carcinoma, NOS	no	No	not reported	Head of pancreas	No	Head of pancreas	not reported	2012	yes	Pharmaceutical Therapy, NOS
TCGA-HV-AA8V	50	-18357	'--	not reported	male	asian	Alive	1962	18357	MX	N1	Stage IIB	T3	7th	not reported	0	920	not reported	8500-03-01	Infiltrating duct carcinoma, NOS	no	No	not reported	Head of pancreas	No	Head of pancreas	not reported	2012	yes	Pharmaceutical Therapy, NOS
TCGA-HV-AA8V	50	-18357	'--	not reported	male	asian	Alive	1962	18357	MX	N1	Stage IIB	T3	7th	not reported	0	920	not reported	8500-03-01	Infiltrating duct carcinoma, NOS	no	No	not reported	Head of pancreas	No	Head of pancreas	not reported	2012	yes	Radiation Therapy, NOS
TCGA-3A-A9IH	66	-24174	'--	not hispanic or latino	female	white	Alive	1946	24174	MX	N0	Stage IA	T1	7th	not reported	0	1021	not reported	8500-03-01	Infiltrating duct carcinoma, NOS	no	No	not reported	Body of pancreas	No	Body of pancreas	not reported	2012	yes	Pharmaceutical Therapy, NOS
TCGA-3A-A9IH	66	-24174	'--	not hispanic or latino	female	white	Alive	1946	24174	MX	N0	Stage IA	T1	7th	not reported	0	1021	not reported	8500-03-01	Infiltrating duct carcinoma, NOS	no	No	not reported	Body of pancreas	No	Body of pancreas	not reported	2012	no	Radiation Therapy, NOS
TCGA-3A-A9IO	55	-20451	'--	not hispanic or latino	male	white	Alive	1954	20451	MX	NX	'--	TX	6th	not reported	0	1942	not reported	8246-03-01	Neuroendocrine carcinoma, NOS	no	No	not reported	Body of pancreas	No	Body of pancreas	not reported	2009	no	Pharmaceutical Therapy, NOS
TCGA-3A-A9IO	55	-20451	'--	not hispanic or latino	male	white	Alive	1954	20451	MX	NX	'--	TX	6th	not reported	0	1942	not reported	8246-03-01	Neuroendocrine carcinoma, NOS	no	No	not reported	Body of pancreas	No	Body of pancreas	not reported	2009	no	Radiation Therapy, NOS
TCGA-FB-AAPP	71	-26239	485	not hispanic or latino	male	white	Dead	1938	26239	MX	N1	Stage IIB	T3	7th	not reported	0	'--	not reported	8500-03-01	Infiltrating duct carcinoma, NOS	no	No	not reported	Head of pancreas	No	Head of pancreas	not reported	2009	yes	Radiation Therapy, NOS
TCGA-FB-AAPP	71	-26239	485	not hispanic or latino	male	white	Dead	1938	26239	MX	N1	Stage IIB	T3	7th	not reported	0	'--	not reported	8500-03-01	Infiltrating duct carcinoma, NOS	no	No	not reported	Head of pancreas	No	Head of pancreas	not reported	2009	yes	Pharmaceutical Therapy, NOS
TCGA-HZ-7289	77	-28174	661	not hispanic or latino	male	white	Dead	1933	28174	MX	N1	Stage IIB	T3	7th	not reported	0	240	not reported	8140-03-01	Adenocarcinoma, NOS	yes	No	not reported	Head of pancreas	No	Head of pancreas	not reported	2010	yes	Radiation Therapy, NOS
TCGA-HZ-7289	77	-28174	661	not hispanic or latino	male	white	Dead	1933	28174	MX	N1	Stage IIB	T3	7th	not reported	0	240	not reported	8140-03-01	Adenocarcinoma, NOS	yes	No	not reported	Head of pancreas	No	Head of pancreas	not reported	2010	yes	Pharmaceutical Therapy, NOS
TCGA-HV-AA8X	75	-27662	532	not reported	female	asian	Dead	1938	27662	MX	N1	Stage IIB	T2	7th	not reported	0	'--	not reported	8500-03-01	Infiltrating duct carcinoma, NOS	no	No	not reported	Body of pancreas	No	Body of pancreas	not reported	2013	no	Radiation Therapy, NOS
TCGA-HV-AA8X	75	-27662	532	not reported	female	asian	Dead	1938	27662	MX	N1	Stage IIB	T2	7th	not reported	0	'--	not reported	8500-03-01	Infiltrating duct carcinoma, NOS	no	No	not reported	Body of pancreas	No	Body of pancreas	not reported	2013	yes	Pharmaceutical Therapy, NOS
TCGA-HZ-A49H	68	-24891	'--	not hispanic or latino	female	white	Alive	1944	24891	MX	N1	Stage IIB	T3	7th	not reported	0	491	not reported	8500-03-01	Infiltrating duct carcinoma, NOS	no	No	not reported	Head of pancreas	No	Head of pancreas	not reported	2012	no	Radiation Therapy, NOS
TCGA-HZ-A49H	68	-24891	'--	not hispanic or latino	female	white	Alive	1944	24891	MX	N1	Stage IIB	T3	7th	not reported	0	491	not reported	8500-03-01	Infiltrating duct carcinoma, NOS	no	No	not reported	Head of pancreas	No	Head of pancreas	not reported	2012	yes	Pharmaceutical Therapy, NOS
TCGA-Q3-A5QY	58	-21277	'--	not hispanic or latino	male	white	Alive	1954	21277	MX	N1	Stage IIB	T3	7th	not reported	0	416	not reported	8500-03-01	Infiltrating duct carcinoma, NOS	no	No	not reported	Head of pancreas	No	Head of pancreas	not reported	2012	yes	Pharmaceutical Therapy, NOS
TCGA-Q3-A5QY	58	-21277	'--	not hispanic or latino	male	white	Alive	1954	21277	MX	N1	Stage IIB	T3	7th	not reported	0	416	not reported	8500-03-01	Infiltrating duct carcinoma, NOS	no	No	not reported	Head of pancreas	No	Head of pancreas	not reported	2012	no	Radiation Therapy, NOS
TCGA-IB-7644	65	-24043	394	not hispanic or latino	female	white	Dead	1946	24043	M1	N1	Stage IV	T3	7th	not reported	0	347	not reported	8500-03-01	Infiltrating duct carcinoma, NOS	no	No	not reported	Head of pancreas	No	Head of pancreas	not reported	2011	yes	Pharmaceutical Therapy, NOS
TCGA-IB-7644	65	-24043	394	not hispanic or latino	female	white	Dead	1946	24043	M1	N1	Stage IV	T3	7th	not reported	0	347	not reported	8500-03-01	Infiltrating duct carcinoma, NOS	no	No	not reported	Head of pancreas	No	Head of pancreas	not reported	2011	no	Radiation Therapy, NOS
TCGA-IB-7652	49	-18129	'--	not hispanic or latino	female	asian	Alive	1962	18129	M0	N1	Stage IIB	T3	7th	not reported	0	1116	not reported	8500-03-01	Infiltrating duct carcinoma, NOS	no	No	not reported	Pancreas, NOS	No	Pancreas, NOS	not reported	2011	yes	Pharmaceutical Therapy, NOS
TCGA-IB-7652	49	-18129	'--	not hispanic or latino	female	asian	Alive	1962	18129	M0	N1	Stage IIB	T3	7th	not reported	0	1116	not reported	8500-03-01	Infiltrating duct carcinoma, NOS	no	No	not reported	Pancreas, NOS	No	Pancreas, NOS	not reported	2011	no	Radiation Therapy, NOS
TCGA-IB-AAUW	63	-23306	230	not hispanic or latino	female	white	Dead	1950	23306	M0	N1	Stage IIB	T3	7th	not reported	0	179	not reported	8500-03-01	Infiltrating duct carcinoma, NOS	no	No	not reported	Head of pancreas	No	Head of pancreas	not reported	2013	no	Radiation Therapy, NOS
TCGA-IB-AAUW	63	-23306	230	not hispanic or latino	female	white	Dead	1950	23306	M0	N1	Stage IIB	T3	7th	not reported	0	179	not reported	8500-03-01	Infiltrating duct carcinoma, NOS	no	No	not reported	Head of pancreas	No	Head of pancreas	not reported	2013	yes	Pharmaceutical Therapy, NOS
TCGA-HV-A5A5	61	-22329	'--	not reported	female	asian	Alive	1951	22329	M0	N1	Stage IIB	T3	7th	not reported	0	289	not reported	8500-03-01	Infiltrating duct carcinoma, NOS	no	No	not reported	Head of pancreas	No	Head of pancreas	not reported	2012	no	Radiation Therapy, NOS
TCGA-HV-A5A5	61	-22329	'--	not reported	female	asian	Alive	1951	22329	M0	N1	Stage IIB	T3	7th	not reported	0	289	not reported	8500-03-01	Infiltrating duct carcinoma, NOS	no	No	not reported	Head of pancreas	No	Head of pancreas	not reported	2012	yes	Pharmaceutical Therapy, NOS
TCGA-3A-A9IV	59	-21732	'--	not hispanic or latino	female	white	Alive	1952	21732	MX	N0	Stage IB	T2	7th	not reported	0	1103	not reported	8246-03-01	Neuroendocrine carcinoma, NOS	no	No	not reported	Tail of pancreas	No	Tail of pancreas	not reported	2011	no	Radiation Therapy, NOS
TCGA-3A-A9IV	59	-21732	'--	not hispanic or latino	female	white	Alive	1952	21732	MX	N0	Stage IB	T2	7th	not reported	0	1103	not reported	8246-03-01	Neuroendocrine carcinoma, NOS	no	No	not reported	Tail of pancreas	No	Tail of pancreas	not reported	2011	no	Pharmaceutical Therapy, NOS
TCGA-2L-AAQL	82	-30092	292	not reported	male	white	Dead	1929	30092	MX	N1	Stage IIB	T3	7th	not reported	0	'--	not reported	8500-03-01	Infiltrating duct carcinoma, NOS	no	No	not reported	Head of pancreas	No	Head of pancreas	not reported	2011	no	Pharmaceutical Therapy, NOS
TCGA-2L-AAQL	82	-30092	292	not reported	male	white	Dead	1929	30092	MX	N1	Stage IIB	T3	7th	not reported	0	'--	not reported	8500-03-01	Infiltrating duct carcinoma, NOS	no	No	not reported	Head of pancreas	No	Head of pancreas	not reported	2011	no	Radiation Therapy, NOS
TCGA-F2-A7TX	77	-28239	95	not reported	male	white	Dead	1936	28239	M0	N1	Stage IIB	T3	7th	not reported	0	'--	not reported	8500-03-01	Infiltrating duct carcinoma, NOS	no	No	not reported	Head of pancreas	No	Head of pancreas	not reported	2013	no	Pharmaceutical Therapy, NOS
TCGA-F2-A7TX	77	-28239	95	not reported	male	white	Dead	1936	28239	M0	N1	Stage IIB	T3	7th	not reported	0	'--	not reported	8500-03-01	Infiltrating duct carcinoma, NOS	no	No	not reported	Head of pancreas	No	Head of pancreas	not reported	2013	no	Radiation Therapy, NOS
TCGA-F2-A44G	79	-29150	233	not hispanic or latino	female	white	Dead	1933	29150	M0	N1	Stage IIB	T3	7th	not reported	0	153	not reported	8140-03-01	Adenocarcinoma, NOS	yes	No	not reported	Head of pancreas	No	Head of pancreas	not reported	2012	yes	Radiation Therapy, NOS
TCGA-F2-A44G	79	-29150	233	not hispanic or latino	female	white	Dead	1933	29150	M0	N1	Stage IIB	T3	7th	not reported	0	153	not reported	8140-03-01	Adenocarcinoma, NOS	yes	No	not reported	Head of pancreas	No	Head of pancreas	not reported	2012	yes	Pharmaceutical Therapy, NOS
TCGA-FB-AAPS	62	-22981	'--	not hispanic or latino	female	white	Alive	1946	22981	MX	N1	Stage IIB	T2	7th	not reported	0	228	not reported	8500-03-01	Infiltrating duct carcinoma, NOS	no	No	not reported	Head of pancreas	No	Head of pancreas	not reported	2008	yes	Radiation Therapy, NOS
TCGA-FB-AAPS	62	-22981	'--	not hispanic or latino	female	white	Alive	1946	22981	MX	N1	Stage IIB	T2	7th	not reported	0	228	not reported	8500-03-01	Infiltrating duct carcinoma, NOS	no	No	not reported	Head of pancreas	No	Head of pancreas	not reported	2008	not reported	Pharmaceutical Therapy, NOS
