# Supplementary material for: Expression, prognostic value and mechanism of SP100 family in pancreatic adenocarcinoma
Source: Aging (Albany NY). 2023 Jun 22;15(12):5569–91. doi: 10.18632/aging.204811 (PMC10333092; doi:10.18632/aging.204811)
Supplement: Supplementary Table 3 [file aging-15-204811-s004.xlsx]

## Sheet: Sheet1
Supplementary Table 3. SP100 family and its 400 co-expressed genes.
Gene	Spearman Correlation	P-value	FDR(BH)	Event_SD	Event_TD
SP100	1	1e-44	1e-40	178	178
SP110	0.8208	1.173e-44	1.16e-40	178	178
IFI44L	0.7015	1.094e-27	7.213e-24	178	178
PARP14	0.6772	3.106e-25	1.535e-21	178	178
SAMD9L	0.6647	4.658e-24	1.842e-20	178	178
XAF1	0.6532	4.965e-23	1.636e-19	178	178
OAS2	0.6503	8.942e-23	2.526e-19	178	178
IRF9	0.6419	4.711e-22	1.164e-18	178	178
MX1	0.6359	1.485e-21	3.263e-18	178	178
IFIH1	0.6339	2.153e-21	4.258e-18	178	178
ZBP1	0.632	3.074e-21	5.336e-18	178	178
OAS3	0.6317	3.238e-21	5.336e-18	178	178
IFI44	0.6308	3.823e-21	5.815e-18	178	178
IFIT3	0.6278	6.714e-21	9.483e-18	178	178
EPSTI1	0.6184	3.687e-20	4.861e-17	178	178
STAT1	0.617	4.732e-20	5.848e-17	178	178
MX2	0.6122	1.093e-19	1.272e-16	178	178
DDX58	0.6099	1.631e-19	1.791e-16	178	178
IFIT2	0.6066	2.844e-19	2.819e-16	178	178
LAMP3	0.6066	2.851e-19	2.819e-16	178	178
UBE2L6	0.6029	5.404e-19	5.089e-16	178	178
IFIT1	0.5971	1.412e-18	1.269e-15	178	178
SP140L	0.5771	3.437e-17	2.955e-14	178	178
CMPK2	0.5761	4.005e-17	3.3e-14	178	178
DDX60	0.5745	5.088e-17	4.025e-14	178	178
RSAD2	0.5688	1.209e-16	9.198e-14	178	178
EIF2AK2	0.5679	1.373e-16	1.005e-13	178	178
HERC6	0.5596	4.65e-16	3.284e-13	178	178
SAMD9	0.5576	6.225e-16	4.245e-13	178	178
ZNFX1	0.5426	5.129e-15	3.381e-12	178	178
NMI	0.5394	7.962e-15	4.926e-12	178	178
TRIM22	0.5394	7.971e-15	4.926e-12	178	178
DAPP1	0.538	9.614e-15	5.761e-12	178	178
DHX58	0.5348	1.467e-14	8.534e-12	178	178
OAS1	0.5345	1.543e-14	8.715e-12	178	178
TRIM34	0.5278	3.721e-14	2.044e-11	178	178
PSMB9	0.5273	3.974e-14	2.124e-11	178	178
B2M	0.5194	1.095e-13	5.673e-11	178	178
TRIM21	0.5193	1.119e-13	5.673e-11	178	178
PARP9	0.5182	1.278e-13	6.316e-11	178	178
BST2	0.5154	1.812e-13	8.738e-11	178	178
HSH2D	0.5132	2.399e-13	1.129e-10	178	178
TAP1	0.5058	5.981e-13	2.751e-10	178	178
GBP4	0.5039	7.524e-13	3.382e-10	178	178
HCP5	0.5025	8.821e-13	3.876e-10	178	178
TAP2	0.4989	1.37e-12	5.89e-10	178	178
IFI27	0.4932	2.678e-12	1.127e-09	178	178
ISG15	0.4896	4.042e-12	1.665e-09	178	178
RNF213	0.4891	4.294e-12	1.733e-09	178	178
LY6E	0.484	7.659e-12	3.029e-09	178	178
CASP4	0.4838	7.873e-12	3.053e-09	178	178
CASP8	0.4819	9.753e-12	3.709e-09	178	178
IFITM1	0.4796	1.266e-11	4.723e-09	178	178
RTP4	0.4793	1.302e-11	4.768e-09	178	178
PLSCR1	0.4696	3.784e-11	1.336e-08	178	178
IFIT5	0.4688	4.097e-11	1.421e-08	178	178
PRIC285	0.4657	5.722e-11	1.938e-08	178	178
TRIM5	0.4656	5.782e-11	1.938e-08	178	178
MAT2B	0.4641	6.814e-11	2.209e-08	178	178
STAT2	0.4631	7.588e-11	2.42e-08	178	178
CXorf38	0.4621	8.435e-11	2.647e-08	178	178
C12orf35	0.4614	9.043e-11	2.744e-08	178	178
TRIM14	0.4613	9.135e-11	2.744e-08	178	178
ANXA8L2	0.4613	9.159e-11	2.744e-08	178	171
OASL	0.4583	1.247e-10	3.626e-08	178	178
RARRES3	0.4576	1.35e-10	3.868e-08	178	178
HLA-F	0.4568	1.464e-10	4.136e-08	178	178
CD80	0.4566	1.497e-10	4.168e-08	178	177
DDX60L	0.4558	1.63e-10	4.477e-08	178	178
DTX3L	0.4548	1.81e-10	4.902e-08	178	178
SPATS2L	0.4539	1.968e-10	5.259e-08	178	178
HLA-B	0.452	2.403e-10	6.298e-08	178	178
CFLAR	0.4519	2.421e-10	6.298e-08	178	178
MYD88	0.4514	2.562e-10	6.581e-08	178	178
IFI35	0.4495	3.107e-10	7.778e-08	178	178
KLHDC7B	0.4488	3.325e-10	8.219e-08	178	177
BTN3A3	0.4479	3.637e-10	8.88e-08	178	178
LOC100133669	0.4459	4.451e-10	1.073e-07	178	170
NLRC5	0.4452	4.763e-10	1.115e-07	178	178
IFI16	0.4451	4.792e-10	1.115e-07	178	178
TEC	0.4438	5.499e-10	1.25e-07	178	178
BTN3A1	0.4425	6.25e-10	1.404e-07	178	178
RAP2C	0.4412	7.112e-10	1.58e-07	178	178
IRF1	0.4408	7.372e-10	1.62e-07	178	178
APOBEC3G	0.4404	7.66e-10	1.649e-07	178	178
CASP1	0.4404	7.674e-10	1.649e-07	178	178
RAD51L1	0.4395	8.389e-10	1.784e-07	178	178
TMEM140	0.4391	8.698e-10	1.83e-07	178	178
PARP8	0.4376	1.009e-09	2.1e-07	178	178
MITD1	0.437	1.066e-09	2.196e-07	178	178
TRIM78P	0.4364	1.135e-09	2.313e-07	178	174
CRLF3	0.4347	1.341e-09	2.705e-07	178	178
LY75	0.4334	1.517e-09	3.03e-07	178	178
ANXA8	0.4317	1.788e-09	3.536e-07	178	174
ARPC2	0.4307	1.961e-09	3.838e-07	178	178
TRIM69	0.4303	2.045e-09	3.964e-07	178	178
LOC647121	0.427	2.792e-09	5.36e-07	178	178
PARP12	0.4264	2.948e-09	5.605e-07	178	178
DGKA	0.4254	3.233e-09	6.031e-07	178	178
ETV7	0.4254	3.233e-09	6.031e-07	178	178
SP110	1	1e-44	1e-42	178	178
STAT1	0.8208	1.173e-44	8.002e-42	178	178
SUSD3	0.6885	2.44e-26	1.608e-23	178	178
TAP1	0.6866	1e-44	1e-42	178	178
UBE2L6	0.6659	3.585e-24	2.287e-21	178	178
XAF1	0.6614	1e-44	1e-42	178	178
SP100	0.6544	1e-44	1e-42	178	178
ZBP1	0.6536	1e-44	1e-42	178	178
MX2	0.6455	1e-44	1e-42	178	178
IFIH1	0.6371	1e-44	1e-42	178	178
EPSTI1	0.6156	1e-44	1e-42	178	178
IFIT2	0.6148	6.958e-20	4.299e-17	178	178
B2M	0.6101	1.573e-19	9.428e-17	178	178
IRF9	0.6032	5.098e-19	2.965e-16	178	178
CMPK2	0.6026	1e-44	1e-42	178	178
BST2	0.6012	1e-44	1e-42	178	178
RSAD2	0.5956	1e-44	1e-42	178	178
SP140L	0.5949	1e-44	1e-42	178	178
NMI	0.5941	2.293e-18	1.295e-15	178	178
IFITM1	0.5924	3.026e-18	1.662e-15	178	178
TRIM21	0.5894	4.945e-18	2.643e-15	178	178
DHX58	0.5882	1e-44	1e-42	178	178
SP140	0.588	6.163e-18	3.207e-15	178	178
NECAP2	0.5836	1e-44	1e-42	178	178
TAP2	0.5815	1e-44	1e-42	178	178
APOBEC3G	0.5777	3.128e-17	1.586e-14	178	178
APOL3	0.576	1e-44	1e-42	178	178
DAPP1	0.5733	6.096e-17	3.013e-14	178	178
CARD16	0.5715	7.989e-17	3.853e-14	178	178
CASP1	0.5574	6.396e-16	3.011e-13	178	178
CD80	0.5536	1.11e-15	5.103e-13	178	178
DDX58	0.5483	2.35e-15	1.056e-12	178	178
EIF2AK2	0.5469	2.832e-15	1.245e-12	178	178
GBP4	0.5457	1e-44	1e-42	178	178
HERC5	0.5436	1e-44	1e-42	178	178
HERC6	0.5427	5.045e-15	2.169e-12	178	178
IFI16	0.5394	1e-44	1e-42	178	178
IFI44L	0.5364	1e-44	1e-42	178	178
IFI44	0.5345	1.531e-14	6.439e-12	178	178
IFIT1	0.533	1.875e-14	7.725e-12	178	178
IFIT3	0.5329	1e-44	1e-42	178	178
ISG15	0.5309	1e-44	1e-42	178	178
LAMP3	0.5289	1e-44	1e-42	178	178
LAP3	0.5232	1e-44	1e-42	178	178
MX1	0.5232	6.789e-14	2.685e-11	178	178
OAS2	0.5225	7.387e-14	2.864e-11	178	178
OAS3	0.5203	9.808e-14	3.73e-11	178	178
PARP14	0.5182	1e-44	1e-42	178	178
PSMB9	0.5164	1e-44	1e-42	178	178
SAMD9L	0.508	4.525e-13	1.688e-10	178	178
TRIM22	0.5064	5.559e-13	2.033e-10	178	178
IFI35	0.5062	5.656e-13	2.033e-10	178	178
SAMD9	0.5024	1e-44	1e-42	178	177
HLA-B	0.5014	1.007e-12	3.554e-10	178	178
TRIM34	0.4989	1e-44	1e-42	178	178
LOC100133669	0.4953	2.09e-12	7.004e-10	178	178
HLA-F	0.4912	2.393e-14	9.658e-12	178	178
DDX60	0.4904	3.679e-12	1.213e-09	178	170
PARP9	0.4892	1.024e-12	3.554e-10	178	178
RARRES3	0.4888	4.433e-12	1.437e-09	178	178
RTP4	0.4881	1.704e-12	5.811e-10	178	178
CCDC109B	0.4847	7.062e-12	2.181e-09	178	178
HLA-E	0.4846	4.657e-12	1.485e-09	178	178
C17orf60	0.4828	6.787e-12	2.13e-09	178	178
LILRA4	0.4825	7.169e-12	2.181e-09	178	178
LY6E	0.4822	7.694e-12	2.305e-09	178	177
IFIT5	0.4817	9.959e-12	2.896e-09	178	168
LPXN	0.4811	9.393e-12	2.772e-09	178	178
HCP5	0.4805	1.031e-11	2.955e-09	178	178
GBP1	0.4782	1.474e-11	4.165e-09	178	178
BTN3A3	0.4765	1.953e-11	5.363e-09	178	178
TMEM140	0.4764	1.983e-11	5.372e-09	178	178
ZNFX1	0.4745	2.226e-11	5.948e-09	178	178
RHEBL1	0.4733	3.056e-11	8.057e-09	178	178
ARPC2	0.4728	3.265e-11	8.496e-09	178	178
TRIM69	0.4726	3.37e-11	8.655e-09	178	177
IL12RB1	0.4695	3.819e-11	9.682e-09	178	178
IL21R	0.4685	5.632e-11	1.358e-08	178	178
OAS1	0.4684	4.281e-11	1.072e-08	178	178
IRF1	0.4683	5.75e-11	1.37e-08	178	177
IFI27	0.4681	4.447e-11	1.099e-08	178	178
RGS10	0.4671	6.693e-11	1.557e-08	178	178
ICOS	0.4667	6.986e-11	1.606e-08	178	178
AIM2	0.4666	7.088e-11	1.611e-08	178	178
HSH2D	0.466	5.563e-11	1.358e-08	178	174
USP18	0.4647	6.367e-11	1.499e-08	178	175
CD40	0.464	9.581e-11	2.105e-08	178	178
SIGLEC1	0.462	8.485e-11	1.907e-08	178	178
KLHDC7B	0.4618	8.642e-11	1.92e-08	178	178
CXorf38	0.4606	1.411e-10	3.001e-08	178	178
ARHGDIB	0.4589	1.708e-10	3.593e-08	178	177
GBP5	0.4587	1.196e-10	2.599e-08	178	178
EAF2	0.4556	2.439e-10	4.98e-08	178	178
TIGIT	0.4556	2.443e-10	4.98e-08	178	178
SIRPG	0.4553	2.512e-10	5.068e-08	178	178
TRIM14	0.455	2.59e-10	5.172e-08	178	178
IL2RG	0.4539	2.92e-10	5.717e-08	178	178
HLA-DOB	0.4536	2.032e-10	4.23e-08	178	178
EAF3	0.4516	3.683e-10	7.141e-08	178	178
TAP1	0.4506	2.754e-10	5.445e-08	178	178
SP140	1	1e-55	1e-51	178	178
SIRPG	0.8664	5.83e-55	5.764e-51	178	178
CYTIP	0.8615	1.076e-53	7.093e-50	178	178
TIGIT	0.8607	1.759e-53	8.694e-50	178	178
MAP4K1	0.8581	7.905e-53	3.126e-49	178	178
CD27	0.8513	3.486e-51	1.149e-47	178	178
P2RY10	0.8501	6.917e-51	1.954e-47	178	178
IRF4	0.8489	1.324e-50	3.273e-47	178	178
CD3E	0.8477	2.443e-50	5.368e-47	178	178
TRAF3IP3	0.8471	3.467e-50	6.855e-47	178	178
ACAP1	0.8468	3.957e-50	7.112e-47	178	178
ICOS	0.8438	1.924e-49	3.17e-46	178	174
SH2D1A	0.8434	2.355e-49	3.582e-46	178	175
TAGAP	0.843	2.81e-49	3.97e-46	178	178
SASH3	0.8424	3.814e-49	4.728e-46	178	178
SIT1	0.8424	3.826e-49	4.728e-46	178	178
LY9	0.842	4.852e-49	5.643e-46	178	177
BTK	0.8414	6.372e-49	7e-46	178	178
CD48	0.8383	3.151e-48	3.28e-45	178	178
SLAMF1	0.8369	6.075e-48	6.006e-45	178	177
PYHIN1	0.8356	1.176e-47	1.108e-44	178	177
IKZF1	0.8335	3.197e-47	2.874e-44	178	178
PTPN7	0.8329	4.41e-47	3.792e-44	178	178
FCRL3	0.8295	2.164e-46	1.783e-43	178	172
CD37	0.8257	1.261e-45	9.975e-43	178	178
CD3D	0.8254	1.423e-45	1.083e-42	178	178
ITK	0.825	1.716e-45	1.256e-42	178	177
CD2	0.8226	5.026e-45	3.55e-42	178	178
CD247	0.8218	7.342e-45	5.006e-42	178	178
CD180	0.8192	2.296e-44	1.513e-41	178	178
CD96	0.8172	5.643e-44	3.599e-41	178	178
CD53	0.8158	1.031e-43	6.368e-41	178	178
ITGAL	0.8156	1.134e-43	6.796e-41	178	178
KLHL6	0.8145	1.817e-43	1.057e-40	178	178
CCR7	0.8141	2.107e-43	1.19e-40	178	177
BIN2	0.8132	3.124e-43	1.716e-40	178	178
ARHGAP9	0.8114	6.759e-43	3.612e-40	178	178
BTLA	0.8107	8.702e-43	4.528e-40	178	176
WDFY4	0.8106	9.217e-43	4.673e-40	178	178
WAS	0.8105	9.795e-43	4.842e-40	178	178
CD52	0.8076	3.235e-42	1.56e-39	178	178
PTPRC	0.8053	8.133e-42	3.829e-39	178	178
STAP1	0.8046	1.094e-41	5.033e-39	178	174
CTLA4	0.8041	1.339e-41	6.017e-39	178	177
ARHGAP30	0.8012	4.193e-41	1.843e-38	178	178
CORO1A	0.8009	4.666e-41	2.006e-38	178	178
KIAA0748	0.8009	4.815e-41	2.026e-38	178	177
DOCK2	0.8007	5.151e-41	2.122e-38	178	178
CXCL13	0.8001	6.496e-41	2.622e-38	178	176
GPR171	0.7988	1.09e-40	4.309e-38	178	177
LTA	0.796	3.134e-40	1.215e-37	178	178
EVI2B	0.7958	3.391e-40	1.289e-37	178	178
GZMK	0.7957	3.573e-40	1.333e-37	178	178
CD28	0.7952	4.368e-40	1.599e-37	178	177
RCSD1	0.7944	5.818e-40	2.092e-37	178	178
CD3G	0.7943	6.022e-40	2.126e-37	178	175
HCLS1	0.7938	7.237e-40	2.511e-37	178	178
CD69	0.7936	7.913e-40	2.698e-37	178	178
TRAT1	0.7933	8.847e-40	2.965e-37	178	175
ARHGAP25	0.7926	1.148e-39	3.783e-37	178	178
RHOH	0.7917	1.62e-39	5.25e-37	178	178
FAM65B	0.7915	1.752e-39	5.587e-37	178	178
FAM78A	0.7905	2.534e-39	7.954e-37	178	178
PRKCB	0.7878	6.979e-39	2.156e-36	178	178
CRTAM	0.7874	7.895e-39	2.402e-36	178	178
NCKAP1L	0.7857	1.496e-38	4.484e-36	178	178
PLA2G2D	0.7855	1.566e-38	4.602e-36	178	175
PIK3CD	0.7855	1.583e-38	4.602e-36	178	178
SUSD3	0.7848	2.018e-38	5.783e-36	178	178
PLEK	0.7839	2.884e-38	8.146e-36	178	178
RASAL3	0.7833	3.572e-38	9.948e-36	178	178
TNFRSF13B	0.7832	3.632e-38	9.975e-36	178	161
CSF2RB	0.7829	4.107e-38	1.112e-35	178	178
SELL	0.7818	5.947e-38	1.589e-35	178	178
ARHGAP15	0.7805	9.465e-38	2.495e-35	178	178
IL10RA	0.7796	1.296e-37	3.373e-35	178	178
CNR2	0.7795	1.357e-37	3.485e-35	178	146
GPR174	0.7793	1.455e-37	3.689e-35	178	171
IL21R	0.7784	2.019e-37	5.054e-35	178	177
CCL5	0.7776	2.665e-37	6.587e-35	178	178
CD38	0.777	3.208e-37	7.832e-35	178	177
GVIN1	0.775	6.519e-37	1.572e-34	178	178
SNX20	0.7748	6.899e-37	1.644e-34	178	178
PDCD1	0.7734	1.126e-36	2.65e-34	178	178
LOC100233209	0.7717	1.977e-36	4.596e-34	178	178
CD79B	0.7717	1.999e-36	4.596e-34	178	178
CD19	0.7711	2.429e-36	5.522e-34	178	165
FAIM3	0.7708	2.706e-36	6.079e-34	178	178
IL2RB	0.7699	3.58e-36	7.953e-34	178	178
ZAP70	0.7696	3.985e-36	8.755e-34	178	178
TCL1A	0.7695	4.176e-36	9.073e-34	178	155
TLR10	0.7688	5.142e-36	1.105e-33	178	177
HLA-DOB	0.7681	6.666e-36	1.417e-33	178	178
CR1	0.7679	6.947e-36	1.461e-33	178	178
CST7	0.7674	8.366e-36	1.741e-33	178	178
TNFSF8	0.767	9.329e-36	1.922e-33	178	178
CD8A	0.7669	9.784e-36	1.995e-33	178	178
CXCR5	0.7665	1.127e-35	2.275e-33	178	178
IL16	0.7642	2.365e-35	4.725e-33	178	178
CXCR4	0.7637	2.775e-35	5.487e-33	178	178
SP140L	1	1e-17	1e-13	178	178
SP100	0.5771	3.437e-17	3.398e-13	178	178
SP110	0.5733	6.096e-17	4.018e-13	178	178
CASP8	0.5643	2.36e-16	1.167e-12	178	178
FAM111A	0.558	5.853e-16	2.315e-12	178	178
TNFRSF14	0.5522	1.348e-15	4.442e-12	178	178
ZNF600	0.5353	1.378e-14	3.613e-11	178	178
C14orf73	0.5349	1.462e-14	3.613e-11	178	178
NMI	0.5306	2.572e-14	5.652e-11	178	178
HSH2D	0.5174	1.409e-13	2.787e-10	178	178
MITD1	0.5113	3.038e-13	5.006e-10	178	178
GSDMB	0.5072	5.007e-13	7.617e-10	178	178
RRN3P3	0.5008	1.085e-12	1.43e-09	178	178
HLA-F	0.4965	1.808e-12	2.235e-09	178	178
LOC115110	0.4943	2.346e-12	2.729e-09	178	178
RIPK3	0.4889	4.416e-12	4.851e-09	178	178
RTP4	0.4862	5.977e-12	6.22e-09	178	178
CACNA1F	0.4843	7.447e-12	7.012e-09	178	177
PSMB8	0.4792	1.322e-11	1.188e-08	178	178
RUFY4	0.4773	1.63e-11	1.401e-08	178	176
OFD1	0.4765	1.775e-11	1.462e-08	178	178
FCHO1	0.4739	2.375e-11	1.807e-08	178	178
HCG26	0.4716	3.05e-11	2.121e-08	178	178
CCNL1	0.4714	3.11e-11	2.121e-08	178	178
HDAC1	0.4708	3.302e-11	2.144e-08	178	178
XAF1	0.4707	3.361e-11	2.144e-08	178	178
ATG16L1	0.4689	4.069e-11	2.438e-08	178	178
LPAR5	0.4675	4.716e-11	2.726e-08	178	178
MICALL2	0.4673	4.825e-11	2.726e-08	178	178
C10orf91	0.4655	5.873e-11	3.226e-08	178	162
ADPGK	0.4631	7.555e-11	3.931e-08	178	178
ARHGAP27	0.4628	7.809e-11	3.959e-08	178	178
ANKMY1	0.4624	8.128e-11	4.018e-08	178	178
TRIM21	0.4558	1.623e-10	7.293e-08	178	178
DAPP1	0.4551	1.741e-10	7.544e-08	178	178
NFATC2IP	0.455	1.77e-10	7.544e-08	178	178
DGKA	0.4548	1.809e-10	7.544e-08	178	178
ANO9	0.4546	1.831e-10	7.544e-08	178	178
SMAD3	0.4543	1.897e-10	7.577e-08	178	178
UBA7	0.4542	1.916e-10	7.577e-08	178	178
IL2RG	0.4523	2.317e-10	8.985e-08	178	178
ATHL1	0.452	2.407e-10	9.154e-08	178	178
KCTD5	0.4505	2.809e-10	1.029e-07	178	178
MXD1	0.4499	2.957e-10	1.035e-07	178	178
PRR13	0.4495	3.1e-10	1.057e-07	178	178
USF1	0.4492	3.185e-10	1.068e-07	178	178
ZC3H12A	0.4488	3.332e-10	1.096e-07	178	178
PML	0.4486	3.381e-10	1.096e-07	178	178
ADAM8	0.4479	3.626e-10	1.156e-07	178	178
SAMD9	0.4475	3.785e-10	1.188e-07	178	178
PLEKHN1	0.4472	3.907e-10	1.207e-07	178	177
PBX4	0.4467	4.096e-10	1.246e-07	178	177
TRIM31	0.4449	4.918e-10	1.452e-07	178	176
TTC31	0.4444	5.142e-10	1.495e-07	178	178
IRF1	0.4433	5.774e-10	1.608e-07	178	178
PTMA	0.4426	6.189e-10	1.7e-07	178	178
RRN3P1	0.4394	8.458e-10	2.202e-07	178	178
FAM192A	0.4393	8.575e-10	2.202e-07	178	178
PRKD2	0.4384	9.301e-10	2.328e-07	178	178
C1orf113	0.4383	9.435e-10	2.332e-07	178	178
PSMB9	0.4378	9.892e-10	2.385e-07	178	178
LOC388242	0.4377	1.004e-09	2.385e-07	178	178
PCBP1	0.4375	1.019e-09	2.385e-07	178	178
WHAMM	0.4374	1.025e-09	2.385e-07	178	178
CCDC88B	0.4357	1.218e-09	2.801e-07	178	178
SLC23A3	0.4349	1.31e-09	2.958e-07	178	178
C1orf170	0.4349	1.317e-09	2.958e-07	178	178
HCP5	0.4339	1.45e-09	3.161e-07	178	178
IRF9	0.4338	1.455e-09	3.161e-07	178	178
SRC	0.4334	1.51e-09	3.235e-07	178	178
UBQLNL	0.4334	1.521e-09	3.235e-07	178	177
ZNF274	0.4331	1.563e-09	3.288e-07	178	178
STYK1	0.4325	1.647e-09	3.392e-07	178	176
NCRNA00201	0.4325	1.648e-09	3.392e-07	178	178
BATF	0.4323	1.686e-09	3.402e-07	178	178
AXIN1	0.4321	1.71e-09	3.405e-07	178	178
SH3RF2	0.4319	1.744e-09	3.405e-07	178	176
XKR9	0.4319	1.752e-09	3.405e-07	178	178
CASP10	0.4319	1.756e-09	3.405e-07	178	178
CLK2	0.4308	1.946e-09	3.698e-07	178	178
TRIM78P	0.4306	1.971e-09	3.698e-07	178	174
PMS2L11	0.4306	1.982e-09	3.698e-07	178	178
FER1L4	0.429	2.315e-09	4.279e-07	178	178
EHD1	0.4287	2.363e-09	4.326e-07	178	178
TNFRSF25	0.4284	2.432e-09	4.412e-07	178	178
FANCA	0.4259	3.091e-09	5.409e-07	178	178
GJB3	0.4257	3.141e-09	5.448e-07	178	175
RHBDL2	0.4254	3.242e-09	5.574e-07	178	178
CCDC88C	0.4252	3.307e-09	5.638e-07	178	178
EPS8L1	0.4246	3.484e-09	5.838e-07	178	178
RNF207	0.4236	3.821e-09	6.266e-07	178	178
ORC2L	0.4232	3.958e-09	6.266e-07	178	178
NOP58	0.423	4.037e-09	6.286e-07	178	178
ALPK1	0.4226	4.192e-09	6.476e-07	178	178
RUNDC2C	0.4217	4.575e-09	6.906e-07	178	178
TAP1	0.4202	5.223e-09	7.592e-07	178	178
ERN2	0.4202	5.26e-09	7.592e-07	178	173
DNAH3	0.4199	5.366e-09	7.689e-07	178	174
STAT6	0.4197	5.513e-09	7.842e-07	178	178
PARP3	0.4191	5.817e-09	8.195e-07	178	178
