# Supplementary material for: Expression, prognostic value and mechanism of SP100 family in pancreatic adenocarcinoma
Source: Aging (Albany NY). 2023 Jun 22;15(12):5569–91. doi: 10.18632/aging.204811 (PMC10333092; doi:10.18632/aging.204811)
Supplement: Supplementary Table 4 [file aging-15-204811-s005.xlsx]

## Sheet: Sheet 1
Supplementary Table 4. Distribution characteristics of 400 genes co-expressed with SP100 family.
Only SP100	Only SP110	Only SP140	Only SP140L	SP100 AND SP110 NOT SP140 NOT SP140L	SP100 AND SP140 NOT SP110 NOT SP140L	SP100 AND SP140L NOT SP110 NOT SP140	SP110 AND SP140 NOT SP100 NOT SP140L	SP110 AND SP140L NOT SP100 NOT SP140	SP140 AND SP140L NOT SP100 NOT SP110	SP100 AND SP110 AND SP140 NOT SP140L	SP100 AND SP110 AND SP140L NOT SP140	SP100 AND SP140 AND SP140L NOT SP110	SP110 AND SP140 AND SP140L NOT SP100	SP100 AND SP110 AND SP140 AND SP140L
RNF213	NECAP2	CYTIP	FAM111A	IFI44L		CASP8	SP140	IL2RG			SP100
CASP4	APOL3	MAP4K1	TNFRSF14	PARP14		MITD1	SIRPG				SP110
PLSCR1	CARD16	CD27	ZNF600	SAMD9L		TRIM78P	TIGIT				XAF1
PRIC285	HERC5	P2RY10	C14orf73	OAS2		DGKA	ICOS				IRF9
TRIM5	LAP3	IRF4	GSDMB	MX1			SUSD3				SP140L
MAT2B	CCDC109B	CD3E	RRN3P3	IFIH1			IL21R				SAMD9
STAT2	HLA-E	TRAF3IP3	LOC115110	ZBP1			HLA-DOB				NMI
C12orf35	C17orf60	ACAP1	RIPK3	OAS3							DAPP1
ANXA8L2	LILRA4	SH2D1A	CACNA1F	IFI44							PSMB9
OASL	LPXN	TAGAP	PSMB8	IFIT3							TRIM21
DDX60L	GBP1	SASH3	RUFY4	EPSTI1							HSH2D
DTX3L	RHEBL1	SIT1	OFD1	STAT1							TAP1
SPATS2L	IL12RB1	LY9	FCHO1	MX2							HCP5
CFLAR	RGS10	BTK	HCG26	DDX58							RTP4
MYD88	AIM2	CD48	CCNL1	IFIT2							HLA-F
NLRC5	USP18	SLAMF1	HDAC1	LAMP3							IRF1
TEC	CD40	PYHIN1	ATG16L1	UBE2L6
BTN3A1	SIGLEC1	IKZF1	LPAR5	IFIT1
RAP2C	ARHGDIB	PTPN7	MICALL2	CMPK2
RAD51L1	GBP5	FCRL3	C10orf91	DDX60
PARP8	EAF2	CD37	ADPGK	RSAD2
CRLF3	EAF3	CD3D	ARHGAP27	EIF2AK2
LY75		ITK	ANKMY1	HERC6
ANXA8		CD2	NFATC2IP	ZNFX1
LOC647121		CD247	ANO9	TRIM22
PARP12		CD180	SMAD3	DHX58
ETV7		CD96	UBA7	OAS1
		CD53	ATHL1	TRIM34
		ITGAL	KCTD5	B2M
		KLHL6	MXD1	PARP9
		CCR7	PRR13	BST2
		BIN2	USF1	GBP4
		ARHGAP9	ZC3H12A	TAP2
		BTLA	PML	IFI27
		WDFY4	ADAM8	ISG15
		WAS	PLEKHN1	LY6E
		CD52	PBX4	IFITM1
		PTPRC	TRIM31	IFIT5
		STAP1	TTC31	CXorf38
		CTLA4	PTMA	TRIM14
		ARHGAP30	RRN3P1	RARRES3
		CORO1A	FAM192A	CD80
		KIAA0748	PRKD2	HLA-B
		DOCK2	C1orf113	IFI35
		CXCL13	LOC388242	KLHDC7B
		GPR171	PCBP1	BTN3A3
		LTA	WHAMM	LOC100133669
		EVI2B	CCDC88B	IFI16
		GZMK	SLC23A3	APOBEC3G
		CD28	C1orf170	CASP1
		RCSD1	SRC	TMEM140
		CD3G	UBQLNL	ARPC2
		HCLS1	ZNF274	TRIM69
		CD69	STYK1
		TRAT1	NCRNA00201
		ARHGAP25	BATF
		RHOH	AXIN1
		FAM65B	SH3RF2
		FAM78A	XKR9
		PRKCB	CASP10
		CRTAM	CLK2
		NCKAP1L	PMS2L11
		PLA2G2D	FER1L4
		PIK3CD	EHD1
		PLEK	TNFRSF25
		RASAL3	FANCA
		TNFRSF13B	GJB3
		CSF2RB	RHBDL2
		SELL	CCDC88C
		ARHGAP15	EPS8L1
		IL10RA	RNF207
		CNR2	ORC2L
		GPR174	NOP58
		CCL5	ALPK1
		CD38	RUNDC2C
		GVIN1	ERN2
		SNX20	DNAH3
		PDCD1	STAT6
		LOC100233209	PARP3
		CD79B
		CD19
		FAIM3
		IL2RB
		ZAP70
		TCL1A
		TLR10
		CR1
		CST7
		TNFSF8
		CD8A
		CXCR5
		IL16
		CXCR4
