# Supplementary material for: Expression, prognostic value and mechanism of SP100 family in pancreatic adenocarcinoma
Source: Aging (Albany NY). 2023 Jun 22;15(12):5569–91. doi: 10.18632/aging.204811 (PMC10333092; doi:10.18632/aging.204811)
Supplement: Supplementary Table 5 [file aging-15-204811-s006.xlsx]

## Sheet: 相关性
Supplementary Table 5. Expression correlation among SP100 family members.
	SP100	SP110	SP140	SP140L
SP100	1	0.803	0.456	0.648
SP110	0.803	1	0.597	0.651
SP140	0.456	0.597	1	0.342
SP140L	0.648	0.651	0.342	1

## Sheet: p值
	SP100	SP110	SP140	SP140L
SP100	0	1.27e-41	2.16e-10	0
SP110	1.27e-41	0	1.08e-18	5.42e-23
SP140	2.16e-10	1.08e-18	0	3.2e-06
SP140L	0	5.42e-23	3.2e-06	0
