# Supplementary material for: Expression, prognostic value and mechanism of SP100 family in pancreatic adenocarcinoma
Source: Aging (Albany NY). 2023 Jun 22;15(12):5569–91. doi: 10.18632/aging.204811 (PMC10333092; doi:10.18632/aging.204811)
Supplement: Supplementary Table 7 [file aging-15-204811-s008.xlsx]

## Sheet: Sheet1
Supplementary Table 7. 20 genes with the strongest protein-protein interactions with the SP100 family.
#node1	node2	node1_string_id	node2_string_id	neighborhood_on_chromosome	gene_fusion	phylogenetic_cooccurrence	homology	coexpression	experimentally_determined_interaction	database_annotated	automated_textmining	combined_score
AURKA	PIAS1	9606.ENSP00000216911	9606.ENSP00000249636	0	0	0	0	0.065	0.343	0	0.137	0.424
AURKA	RPA1	9606.ENSP00000216911	9606.ENSP00000254719	0	0	0	0	0.456	0	0	0.074	0.475
AURKA	SUMO1	9606.ENSP00000216911	9606.ENSP00000376077	0	0	0	0	0.062	0.078	0.8	0.134	0.83
AURKA	UBE2I	9606.ENSP00000216911	9606.ENSP00000348056	0	0	0	0	0.083	0.282	0.9	0.164	0.937
AURKA	TP53	9606.ENSP00000216911	9606.ENSP00000269305	0	0	0	0	0.096	0.875	0.9	0.935	0.999
CLPP	STUB1	9606.ENSP00000245816	9606.ENSP00000219548	0	0	0	0	0.246	0.252	0	0.25	0.54
CLPP	DNAJB1	9606.ENSP00000245816	9606.ENSP00000254322	0	0	0	0	0.064	0	0	0.449	0.462
CLPP	HSPA4	9606.ENSP00000245816	9606.ENSP00000302961	0	0	0	0	0.066	0.128	0	0.484	0.543
CLPP	SP100	9606.ENSP00000245816	9606.ENSP00000343023	0	0	0	0	0.069	0	0	0.949	0.95
DAXX	STUB1	9606.ENSP00000363668	9606.ENSP00000219548	0	0	0	0	0	0.27	0	0.327	0.488
DAXX	PIAS1	9606.ENSP00000363668	9606.ENSP00000249636	0	0	0	0	0.105	0	0	0.497	0.53
DAXX	H3F3B	9606.ENSP00000363668	9606.ENSP00000254810	0	0	0	0	0	0.995	0	0.97	0.999
DAXX	PML	9606.ENSP00000363668	9606.ENSP00000268058	0	0	0	0	0.064	0.925	0.9	0.873	0.999
DAXX	TP53	9606.ENSP00000363668	9606.ENSP00000269305	0	0	0	0	0.062	0.894	0.8	0.966	0.999
DAXX	SP100	9606.ENSP00000363668	9606.ENSP00000343023	0	0	0	0	0.074	0.057	0.9	0.943	0.994
DAXX	UBE2I	9606.ENSP00000363668	9606.ENSP00000348056	0	0	0	0	0.057	0.872	0.9	0.881	0.998
DAXX	SP140L	9606.ENSP00000363668	9606.ENSP00000397911	0	0	0	0	0.062	0.057	0	0.439	0.46
DAXX	SUMO2	9606.ENSP00000363668	9606.ENSP00000405965	0	0	0	0	0	0.891	0	0.758	0.972
DAXX	SUMO1	9606.ENSP00000363668	9606.ENSP00000376077	0	0	0	0	0	0.981	0.8	0.981	0.999
DDX5	SUMO1	9606.ENSP00000225792	9606.ENSP00000376077	0	0	0	0	0.088	0.162	0.8	0	0.833
DDX5	SUMO2	9606.ENSP00000225792	9606.ENSP00000405965	0	0	0	0	0.062	0.162	0.9	0.124	0.922
DDX5	PIAS1	9606.ENSP00000225792	9606.ENSP00000249636	0	0	0	0	0.062	0.27	0.9	0.171	0.935
DDX5	UBE2I	9606.ENSP00000225792	9606.ENSP00000348056	0	0	0	0	0.073	0.33	0.9	0.146	0.939
DDX5	TP53	9606.ENSP00000225792	9606.ENSP00000269305	0	0	0	0	0	0.748	0.9	0.988	0.999
DNAJB1	SIRT1	9606.ENSP00000254322	9606.ENSP00000212015	0	0	0	0	0	0.058	0.6	0.266	0.699
DNAJB1	STUB1	9606.ENSP00000254322	9606.ENSP00000219548	0	0	0	0	0.056	0.432	0	0.819	0.895
DNAJB1	SP100	9606.ENSP00000254322	9606.ENSP00000343023	0	0	0	0	0	0	0	0.814	0.814
DNAJB1	TP53	9606.ENSP00000254322	9606.ENSP00000269305	0	0	0	0	0	0.486	0	0.836	0.912
DNAJB1	HSPA4	9606.ENSP00000254322	9606.ENSP00000302961	0.042	0	0.341	0	0.26	0.87	0.9	0.992	0.999
H3F3B	TP53	9606.ENSP00000254810	9606.ENSP00000269305	0	0	0	0	0	0	0	0.568	0.568
H3F3B	SP100	9606.ENSP00000254810	9606.ENSP00000343023	0	0	0	0	0	0.821	0	0.244	0.859
HSPA4	SIRT1	9606.ENSP00000302961	9606.ENSP00000212015	0	0	0	0	0.062	0.183	0	0.535	0.612
HSPA4	STUB1	9606.ENSP00000302961	9606.ENSP00000219548	0	0	0	0	0.046	0.993	0.9	0.989	0.999
HSPA4	UBE3A	9606.ENSP00000302961	9606.ENSP00000232165	0	0	0	0	0.064	0.549	0	0.805	0.91
HSPA4	NUP210	9606.ENSP00000302961	9606.ENSP00000254508	0	0	0	0	0.053	0	0.9	0.054	0.902
HSPA4	TP53	9606.ENSP00000302961	9606.ENSP00000269305	0	0	0	0	0.065	0.873	0	0.989	0.998
HSPA4	RANBP2	9606.ENSP00000302961	9606.ENSP00000283195	0	0	0	0	0.182	0.241	0.9	0.203	0.943
HSPA4	SUMO2	9606.ENSP00000302961	9606.ENSP00000405965	0	0	0	0	0.126	0.173	0	0.298	0.449
HSPA4	SUMO1	9606.ENSP00000302961	9606.ENSP00000376077	0	0	0	0	0.187	0.16	0	0.508	0.635
HSPA4	SP100	9606.ENSP00000302961	9606.ENSP00000343023	0	0	0	0	0	0	0	0.988	0.988
NUP210	SP140	9606.ENSP00000254508	9606.ENSP00000375899	0	0	0	0	0	0	0	0.512	0.512
NUP210	SUMO2	9606.ENSP00000254508	9606.ENSP00000405965	0	0	0	0	0	0	0.9	0	0.9
NUP210	SUMO1	9606.ENSP00000254508	9606.ENSP00000376077	0	0	0	0	0	0	0.9	0.097	0.905
NUP210	PML	9606.ENSP00000254508	9606.ENSP00000268058	0	0	0	0	0	0	0.9	0.234	0.92
NUP210	UBE2I	9606.ENSP00000254508	9606.ENSP00000348056	0	0	0	0	0.075	0.58	0.9	0.09	0.959
NUP210	RANBP2	9606.ENSP00000254508	9606.ENSP00000283195	0	0	0	0	0.078	0	0.9	0.772	0.977
NUP210	SP100	9606.ENSP00000254508	9606.ENSP00000343023	0	0	0	0	0	0	0.9	0.838	0.983
PIAS1	UBA2	9606.ENSP00000249636	9606.ENSP00000246548	0	0	0	0	0.091	0.181	0	0.755	0.801
PIAS1	SP100	9606.ENSP00000249636	9606.ENSP00000343023	0	0	0	0	0.051	0.056	0	0.458	0.472
PIAS1	PML	9606.ENSP00000249636	9606.ENSP00000268058	0	0	0	0	0.051	0.281	0	0.392	0.549
PIAS1	RANBP2	9606.ENSP00000249636	9606.ENSP00000283195	0	0	0	0	0.084	0	0	0.699	0.712
PIAS1	TP53	9606.ENSP00000249636	9606.ENSP00000269305	0	0	0	0	0	0.873	0	0.448	0.927
PIAS1	SUMO2	9606.ENSP00000249636	9606.ENSP00000405965	0	0	0	0	0	0.878	0.9	0.887	0.998
PIAS1	UBE2I	9606.ENSP00000249636	9606.ENSP00000348056	0	0	0	0	0.067	0.965	0.5	0.991	0.999
PIAS1	SUMO1	9606.ENSP00000249636	9606.ENSP00000376077	0	0	0	0	0.058	0.912	0.9	0.937	0.999
PML	SIRT1	9606.ENSP00000268058	9606.ENSP00000212015	0	0	0	0	0.062	0.316	0.9	0.727	0.98
PML	UBE3A	9606.ENSP00000268058	9606.ENSP00000232165	0	0	0	0	0.049	0.345	0	0.26	0.499
PML	RANBP2	9606.ENSP00000268058	9606.ENSP00000283195	0	0	0	0	0.062	0.27	0.9	0.333	0.948
PML	SUMO2	9606.ENSP00000268058	9606.ENSP00000405965	0	0	0	0	0	0.687	0.9	0.595	0.986
PML	UBE2I	9606.ENSP00000268058	9606.ENSP00000348056	0	0	0	0	0	0.899	0.9	0.531	0.994
PML	SP100	9606.ENSP00000268058	9606.ENSP00000343023	0	0	0	0	0.063	0.785	0.9	0.827	0.996
PML	TP53	9606.ENSP00000268058	9606.ENSP00000269305	0	0	0	0	0.062	0.882	0.9	0.707	0.996
PML	SUMO1	9606.ENSP00000268058	9606.ENSP00000376077	0	0	0	0	0	0.978	0.9	0.782	0.999
RANBP2	UBA2	9606.ENSP00000283195	9606.ENSP00000246548	0	0	0	0	0.288	0.27	0	0.776	0.873
RANBP2	TP53	9606.ENSP00000283195	9606.ENSP00000269305	0	0	0	0	0	0.495	0	0.325	0.645
RANBP2	SP100	9606.ENSP00000283195	9606.ENSP00000343023	0	0	0	0	0.067	0.488	0.9	0.489	0.972
RANBP2	SUMO2	9606.ENSP00000283195	9606.ENSP00000405965	0	0	0	0	0.096	0.884	0.9	0.734	0.996
RANBP2	UBE2I	9606.ENSP00000283195	9606.ENSP00000348056	0	0	0	0	0.093	0.981	0.9	0.992	0.999
RANBP2	SUMO1	9606.ENSP00000283195	9606.ENSP00000376077	0	0	0	0	0.167	0.978	0.9	0.991	0.999
RPA1	SUMO1	9606.ENSP00000254719	9606.ENSP00000376077	0	0	0	0	0.093	0.078	0.65	0.197	0.733
RPA1	UBE2I	9606.ENSP00000254719	9606.ENSP00000348056	0	0	0	0	0.097	0	0.9	0.41	0.942
RPA1	SUMO2	9606.ENSP00000254719	9606.ENSP00000405965	0	0	0	0	0.106	0.101	0.9	0.395	0.944
RPA1	TP53	9606.ENSP00000254719	9606.ENSP00000269305	0	0	0	0	0.06	0.973	0.9	0.986	0.999
SIRT1	UBE2I	9606.ENSP00000212015	9606.ENSP00000348056	0	0	0	0	0.051	0.27	0	0.392	0.542
SIRT1	SUMO2	9606.ENSP00000212015	9606.ENSP00000405965	0	0	0	0	0.108	0.27	0	0.428	0.595
SIRT1	TP53	9606.ENSP00000212015	9606.ENSP00000269305	0	0	0	0	0.062	0.884	0.9	0.989	0.999
SP100	SP110	9606.ENSP00000343023	9606.ENSP00000258381	0	0	0	0.797	0.609	0	0	0.63	0.657
SP100	TP53	9606.ENSP00000343023	9606.ENSP00000269305	0	0	0	0	0	0.142	0.9	0.412	0.945
SP100	SUMO2	9606.ENSP00000343023	9606.ENSP00000405965	0	0	0	0	0	0.687	0.9	0.683	0.989
SP100	UBE2I	9606.ENSP00000343023	9606.ENSP00000348056	0	0	0	0	0	0.88	0.9	0.672	0.995
SP100	SUMO1	9606.ENSP00000343023	9606.ENSP00000376077	0	0	0	0	0	0.812	0.9	0.8	0.995
SP110	STUB1	9606.ENSP00000258381	9606.ENSP00000219548	0	0	0	0	0.052	0.414	0	0	0.42
STUB1	UBE2I	9606.ENSP00000219548	9606.ENSP00000348056	0	0	0	0	0.065	0.248	0	0.35	0.503
STUB1	UBE3A	9606.ENSP00000219548	9606.ENSP00000232165	0	0	0	0	0.062	0.056	0	0.568	0.584
STUB1	TP53	9606.ENSP00000219548	9606.ENSP00000269305	0	0	0	0	0.063	0.897	0	0.682	0.966
SUMO1	UBE3A	9606.ENSP00000376077	9606.ENSP00000232165	0	0	0	0	0.062	0.27	0.9	0.33	0.948
SUMO1	UBA2	9606.ENSP00000376077	9606.ENSP00000246548	0	0	0	0	0.143	0.978	0.9	0.927	0.999
SUMO1	TP53	9606.ENSP00000376077	9606.ENSP00000269305	0	0	0	0	0.062	0.876	0.9	0.956	0.999
SUMO1	UBE2I	9606.ENSP00000376077	9606.ENSP00000348056	0	0	0	0	0.187	0.991	0.9	0.992	0.999
SUMO1	SUMO2	9606.ENSP00000376077	9606.ENSP00000405965	0	0	0	0.914	0.145	0.151	0.9	0.952	0.927
SUMO2	UBA2	9606.ENSP00000405965	9606.ENSP00000246548	0	0	0	0	0.141	0.765	0.9	0.842	0.996
SUMO2	TP53	9606.ENSP00000405965	9606.ENSP00000269305	0	0	0	0	0.054	0.282	0.9	0.487	0.96
SUMO2	UBE2I	9606.ENSP00000405965	9606.ENSP00000348056	0	0	0	0	0.167	0.994	0.9	0.987	0.999
TP53	UBE3A	9606.ENSP00000269305	9606.ENSP00000232165	0	0	0	0	0	0.919	0.8	0.989	0.999
TP53	UBE2I	9606.ENSP00000269305	9606.ENSP00000348056	0	0	0	0	0.062	0.92	0.9	0.895	0.999
UBA2	UBE3A	9606.ENSP00000246548	9606.ENSP00000232165	0	0	0	0	0.096	0.282	0	0.226	0.454
UBA2	UBE2I	9606.ENSP00000246548	9606.ENSP00000348056	0.045	0	0	0	0.09	0.995	0.9	0.994	0.999
UBE2I	UBE3A	9606.ENSP00000348056	9606.ENSP00000232165	0	0	0	0	0.068	0.16	0	0.562	0.628
