# Supplementary material for: Expression, prognostic value and mechanism of SP100 family in pancreatic adenocarcinoma
Source: Aging (Albany NY). 2023 Jun 22;15(12):5569–91. doi: 10.18632/aging.204811 (PMC10333092; doi:10.18632/aging.204811)
Supplement: Supplementary Table 9 [file aging-15-204811-s010.xlsx]

## Sheet: Sheet1
Supplementary Table 9. Relationship between the expression levels of SP100 family members and the infiltration levels of various tumor immunoinfiltrating cells.
SP100	cell	Correlation	| Cor |	P
SP100	Act CD8	0.213	0.213	0.00419
SP100	Tcm CD8	0.203	0.203	0.00649
SP100	Tem CD8	0.315	0.315	1.94e-05
SP100	Act CD4	0.366	0.366	5.76e-07
SP100	Tcm CD4	0.326	0.326	9.51e-06
SP100	Tem CD4	0.047	0.047	0.533
SP100	Tfh	0.199	0.199	0.00755
SP100	Tgd	0.127	0.127	0.0898
SP100	Th1	0.244	0.244	0.00105
SP100	Th17	0.163	0.163	0.0297
SP100	Th2	0.222	0.222	0.00282
SP100	Treg	0.166	0.166	0.0261
SP100	Act B	0.163	0.163	0.0296
SP100	Imm B	0.352	0.352	1.61e-06
SP100	Mem B	0.093	0.093	0.216
SP100	NK	0.28	0.28	0.000153
SP100	CD56bright	0.243	0.243	0.0011
SP100	CD56dim	0.213	0.213	0.0042
SP100	NKT	0.29	0.29	8.73e-05
SP100	Act DC	0.245	0.245	0.000985
SP100	pDC	-0.005	0.005	0.951
SP100	iDC	-0.048	0.048	0.521
SP100	Macrophage	0.141	0.141	0.0598
SP100	Eosinophil	-0.007	0.007	0.928
SP100	Mast	0.152	0.152	0.0423
SP100	Monocyte	0.05	0.05	0.509
SP100	Neutrophil	-0.016	0.016	0.827
SP110	Act CD8	0.361	0.361	8.4e-07
SP110	Tcm CD8	0.288	0.288	9.78e-05
SP110	Tem CD8	0.421	0.421	6.18e-09
SP110	Act CD4	0.436	0.436	1.6e-09
SP110	Tcm CD4	0.358	0.358	1.06e-06
SP110	Tem CD4	0.138	0.138	0.0659
SP110	Tfh	0.323	0.323	1.15e-05
SP110	Tgd	0.288	0.288	9.72e-05
SP110	Th1	0.375	0.375	2.85e-07
SP110	Th17	0.108	0.108	0.149
SP110	Th2	0.256	0.256	0.000555
SP110	Treg	0.298	0.298	5.4e-05
SP110	Act B	0.267	0.267	0.000326
SP110	Imm B	0.445	0.445	6.35e-10
SP110	Mem B	0.237	0.237	0.00141
SP110	NK	0.352	0.352	1.58e-06
SP110	CD56bright	0.256	0.256	0.000557
SP110	CD56dim	0.238	0.238	0.00138
SP110	NKT	0.393	0.393	6.91e-08
SP110	Act DC	0.356	0.356	1.15e-06
SP110	pDC	0.112	0.112	0.134
SP110	iDC	0.028	0.028	0.708
SP110	Macrophage	0.296	0.296	6.25e-05
SP110	Eosinophil	0.074	0.074	0.321
SP110	Mast	0.279	0.279	0.000161
SP110	Monocyte	0.158	0.158	0.0347
SP110	Neutrophil	0.101	0.101	0.179
SP140	Act CD8	0.7	0.7	2.2e-16
SP140	Tcm CD8	0.336	0.336	4.8e-06
SP140	Tem CD8	0.783	0.783	2.1e-16
SP140	Act CD4	0.575	0.575	1.9e-16
SP140	Tcm CD4	0.285	0.285	0.00012
SP140	Tem CD4	0.556	0.556	1.8e-16
SP140	Tfh	0.72	0.72	1.7e-16
SP140	Tgd	0.523	0.523	1.6e-16
SP140	Th1	0.759	0.759	1.5e-16
SP140	Th17	0.041	0.041	0.582
SP140	Th2	0.361	0.361	7.97e-07
SP140	Treg	0.638	0.638	1.4e-16
SP140	Act B	0.782	0.782	1.3e-16
SP140	Imm B	0.857	0.857	1.2e-16
SP140	Mem B	0.548	0.548	1.1e-16
SP140	NK	0.652	0.652	1e-16
SP140	CD56bright	0.145	0.145	0.053
SP140	CD56dim	0.077	0.077	0.303
SP140	NKT	0.688	0.688	1e-16
SP140	Act DC	0.444	0.444	7.23e-10
SP140	pDC	0.387	0.387	1.1e-07
SP140	iDC	0.277	0.277	0.000186
SP140	Macrophage	0.695	0.695	9e-17
SP140	Eosinophil	0.5	0.5	1.1e-16
SP140	Mast	0.638	0.638	1.7e-16
SP140	Monocyte	0.298	0.298	5.34e-05
SP140	Neutrophil	0.393	0.393	6.92e-08
SP140L	Act CD8	0.13	0.13	0.0833
SP140L	Tcm CD8	-0.036	0.036	0.628
SP140L	Tem CD8	0.151	0.151	0.0434
SP140L	Act CD4	0.285	0.285	0.000118
SP140L	Tcm CD4	0.162	0.162	0.0302
SP140L	Tem CD4	-0.209	0.209	0.00498
SP140L	Tfh	-0.014	0.014	0.85
SP140L	Tgd	-0.054	0.054	0.471
SP140L	Th1	0.051	0.051	0.499
SP140L	Th17	0.329	0.329	7.98e-06
SP140L	Th2	0.033	0.033	0.661
SP140L	Treg	-0.094	0.094	0.212
SP140L	Act B	0.014	0.014	0.85
SP140L	Imm B	0.117	0.117	0.119
SP140L	Mem B	-0.009	0.009	0.902
SP140L	NK	0.009	0.009	0.903
SP140L	CD56bright	0.176	0.176	0.0184
SP140L	CD56dim	0.32	0.32	1.36e-05
SP140L	NKT	0.082	0.082	0.277
SP140L	Act DC	0.086	0.086	0.255
SP140L	pDC	-0.026	0.026	0.728
SP140L	iDC	-0.265	0.265	0.000347
SP140L	Macrophage	-0.045	0.045	0.552
SP140L	Eosinophil	-0.094	0.094	0.21
SP140L	Mast	-0.077	0.077	0.306
SP140L	Monocyte	0.006	0.006	0.934
SP140L	Neutrophil	0	0	0.997
