# Supplementary material for: Expression, prognostic value and mechanism of SP100 family in pancreatic adenocarcinoma
Source: Aging (Albany NY). 2023 Jun 22;15(12):5569–91. doi: 10.18632/aging.204811 (PMC10333092; doi:10.18632/aging.204811)
Supplement: Supplementary Table 10 [file aging-15-204811-s011.xlsx]

## Sheet: 相关性
Supplementary Table 10. Expression correlation among SP100 family members and immune checkpoint genes.
	CD44	CD86	CD274	CD70	HHLA2	PDCD1LG2	LGALS9	CD276	HAVCR2	LAIR1	NRP1
SP100	0.522	0.452	0.505	0.452	0.241	0.415	0.468	0.317	0.443	0.368	0.322
SP110	0.373	0.497	0.432	0.467	0.188	0.491	0.507	0.262	0.479	0.43	0.246
SP140	0.301	0.769	0.504	0.478	0.142	0.692	0.335	0.269	0.735	0.733	0.471
SP140L	0.301	0.191	0.249	0.395	0.398	0.193	0.479	0.17	0.196	0.189	0.097

## Sheet: p值
	CD44	CD86	CD274	CD70	HHLA2	PDCD1LG2	LGALS9	CD276	HAVCR2	LAIR1	NRP1
SP100	0	3.06e-10	0	2.1e-10	0.00117	1.05e-08	5.38e-11	1.7e-05	8.14e-10	5.03e-07	1.21e-05
SP110	2.73e-07	1.46e-12	1.61e-09	4.41e-11	0.0119	3.1e-12	4.32e-13	0.000397	1.19e-11	1.9e-09	0.000915
SP140	4.54e-05	0	0	1.36e-11	0.0572	0	5.3e-06	0.000284	0	0	3.61e-11
SP140L	4.53e-05	0.0106	0.000811	4.48e-08	4.51e-08	0.00973	1.14e-11	0.0227	0.0087	0.0115	0.195
