# Supplementary material for: Expression, prognostic value and mechanism of SP100 family in pancreatic adenocarcinoma
Source: Aging (Albany NY). 2023 Jun 22;15(12):5569–91. doi: 10.18632/aging.204811 (PMC10333092; doi:10.18632/aging.204811)
Supplement: Supplementary Table 11 [file aging-15-204811-s012.xlsx]

## Sheet: Sheet1
Supplementary Table 11. Clinicopathologic features of the 93 PAAD patients.
ID	status	time	Expression level of SP100	TNM staging	group	drinking history	history of diabetes	smoking history	pathological grade	N staging	nerve invasion	macrovascular invasion	Jaundice	P53	Ki-67	Size(cm)	Site	CA199
ZCPA190701T	1	123	0	3A	Low	No	No	No	G2	N0	Yes	No	no	2	1	7	Head	1000
ZCPA190702T	1	429	0.95	2B	Low	Yes	No	No	G2	N1	Yes	No	mild jaundice	2	2	5	Head	1000
ZCPA190703T	1	560	0.3375	1B	Low	No	No	No	G2	N1	Yes	No	mild jaundice	2	2	4	Head	259
ZCPA190704T	1	696	1.425	3A	Low	Yes	Yes	No	G2	N0	Yes	No	no	0	2	5	Body	573
ZCPA190705T	0	420	1.425	2A	Low	No	No	No	G2	N0	Yes	No	moderate jaundice	2	2	3	Head	4
ZCPA190706T	1	321	1.425	3A	Low	No	Yes	No	G2	N0	Yes	No	no	2	2	5	Body	1000
ZCPA190707T	1	381	0.85	1B	Low	No	No	No	G1	N1	No	No	no	2	2	2	Head	1000
ZCPA190708T	1	1269	0.675	1B	Low	No	No	No	G2	N0	No	No	moderate jaundice	1	1	4	Head	90.36
ZCPA190709T	1	504	0.95	2A	Low	No	No	No	G2	N0	No	No	mild jaundice	0	1	3	Head	25
ZCPA190710T	1	108	1.425	2B	Low	No	No	No	G2	N1	Yes	No	moderate jaundice	0	2	5	Head	23
ZCPA190711T	1	820	0.95	2A	Low	No	No	No	G2	N0	Yes	No	no	0	0	4	Head	1000
ZCPA190712T	1	75	1.425	2A	Low	No	Yes	No	G2	N0	Yes	No	no	2	1	4	Head	200
ZCPA190713T	1	690	2.375	2B	High	No	No	Yes	G2	N0	Yes	Yes	no	2	2	5	Body and tail	28
ZCPA190714T	1	276	1.425	2B	Low	Yes	No	No	G3	N1	Yes	No	no	1	1	5	Head	891
ZCPA190715T	1	603	1.425	2B	Low	No	No	No	G2	N0	Yes	No	moderate jaundice	2	2	5	Head	1000
ZCPA190716T	1	60	1.35	2A	Low	No	Yes	No	G2	N0	Yes	No	no	0	2	5	Head	2.1
ZCPA190717T	1	784	0.95	2B	Low	No	No	No	G1	N1	No	No	no	0	2	5	Body	8.33
ZCPA190718T	1	900	0.45	1B	Low	No	No	No	G1	N0	No	No	moderate jaundice	0	2	3	Head	201
ZCPA190719T	1	201	1.425	2A	Low	No	Yes	No	G2	N0	No	No	no	0	2	5	Head	1000
ZCPA190720T	1	369	0.95	2B	Low	No	No	No	G3	N1	No	No	moderate jaundice	2	2	4	Head	559
ZCPA190721T	1	120	0.95	4A	Low	No	No	No	G2	N1	Yes	No	no	1	1	2	Body and tail	1000
ZCPA190722T	1	189	1.425	2B	Low	No	No	No	G2	N1	No	No	no	0	2	4	Head	172
ZCPA190723T	1	1429	0.95	1B	Low	Yes	No	No	G2	N0	No	No	moderate jaundice	0	1	4	Head	37.19
ZCPA190724T	1	231	2.375	2B	High	No	No	Yes	G1	N1	Yes	Yes	no	0	2	3	Head	0.855
ZCPA190725T	1	137	2.375	3A	High	Yes	Yes	Yes	G3	N0	Yes	Yes	severe jaundice	2	2	3	Head	333.2
ZCPA190726T	1	588	1.9	3A	High	Yes	Yes	No	G2	N1	Yes	Yes	no	0	2	3	Body and tail	1000
ZCPA190727T	1	258	1.425	2B	Low	Yes	Yes	No	G2	N1	Yes	No	no	2	2	4	Body and tail	837
ZCPA190728T	1	90	2.25	2B	High	No	Yes	Yes	G3	N1	Yes	Yes	no	2	2	4	Body and tail	484
ZCPA190729T	1	639	2.375	2B	High	No	Yes	Yes	G3	N1	Yes	Yes	no	2	2	5	Body and tail	4.84
ZCPA190730T	1	1089	1.35	2A	Low	No	No	No	G2	N0	No	No	no	0	2	5	Head	12
ZCPA190731T	1	159	1.9	2B	High	No	No	No	G2	N1	Yes	Yes	no	0	2	3	Head	386.6
ZCPA190732T	1	786	1.9	3B	High	Yes	No	No	G3	N1	No	Yes	moderate jaundice	2	2	4	Head	1000
ZCPA190733T	0	159	1.425	1B	Low	No	No	No	G2	N0	No	No	no	0	1	3	Body and tail	40.95
ZCPA190734T	0	702	0.95	3A	Low	No	No	No	G2	N1	No	No	no	3	3	3	Head	1000
ZCPA190735T	1	753	1.425	2A	Low	Yes	No	No	G2	N0	Yes	No	no	2	2	5	Head	48
ZCPA190736T	1	243	1.9	2B	High	No	No	No	G2	N1	Yes	Yes	no	2	2	4	Head	140
ZCPA190737T	1	978	1.425	2A	Low	Yes	No	No	G2	N0	Yes	No	no	2	2	3	Head	1000
ZCPA190738T	1	162	2.375	2B	High	Yes	No	Yes	G2	N1	Yes	Yes	no	2	1	7	Head	1000
ZCPA190739T	1	564	0.85	2A	Low	No	No	No	G2	N0	No	No	no	0	2	5	Body and tail	1000
ZCPA190740T	1	594	1.9	4A	High	No	No	No	G3	N0	Yes	Yes	no	1	2	10	Body and tail	292
ZCPA190741T	1	885	1.9	2A	High	No	Yes	No	G2	N0	Yes	Yes	no	0	2	5	Body and tail	1000
ZCPA190742T	1	384	2.375	2B	High	No	No	Yes	G3	N1	Yes	Yes	no	2	2	4	Head	542
ZCPA190743T	1	336	2.375	2A	High	Yes	Yes	Yes	G2	N0	No	Yes	moderate jaundice	0	3	6	Head	13.96
ZCPA190744T	1	930	1.425	2B	Low	No	No	No	G3	N1	No	No	no	1	2	5	Head	207.9
ZCPA190745T	1	1071	0.95	2A	Low	No	No	No	G2	N0	Yes	No	no	0	2	4	Body and tail	1000
ZCPA190746T	1	252	1.9	1B	High	No	No	No	G2	N0	No	Yes	no	2	2	3	Body and tail	343.4
ZCPA190747T	0	135	2.375	1B	High	No	Yes	Yes	G2	N0	Yes	Yes	no	2	2	4	Head	1000
ZCPA190748T	0	921	1.425	1B	Low	No	No	No	G3	N0	No	No	no	0	2	5	Head	125
ZCPA190749T	0	1089	1.35	1B	Low	Yes	No	No	G2	N0	No	No	no	3	2	3.5	Body and tail	0.6
ZCPA190750T	1	237	0.9	2B	Low	Yes	No	No	G1	N1	Yes	No	moderate jaundice	2	2	4	Head	1000
ZCPA190751T	1	798	1.425	2A	Low	No	No	No	G2	N0	No	No	no	0	1	5	Body and tail	397
ZCPA190752T	1	396	1.425	2A	Low	No	No	No	G2	N0	Yes	No	moderate jaundice	0	2	4	Head	63
ZCPA190753N	1	201	2.375	2B	High	No	No	Yes	G2	N1	Yes	Yes	moderate jaundice	2	1	4	Body	164.8
ZCPA190754T	1	396	1.275	2B	Low	No	No	No	G2	N1	Yes	No	no	0	1	7	Body	8.15
ZCPA190755T	1	270	2.375	3B	High	No	No	Yes	G3	N1	Yes	Yes	moderate jaundice	2	2	4	Head	16
ZCPA190756T	1	139	2.375	3B	High	Yes	No	Yes	G2	N1	Yes	Yes	no	2	2	6	Body	472
ZCPA190757T	1	594	1.425	2A	Low	No	No	No	G3	N0	Yes	No	no	0	2	6	Body and tail	67
ZCPA190758T	1	504	0.9	2B	Low	Yes	No	No	G1	N0	No	No	no	0	2	14	Body and tail	6.3
ZCPA190759T	1	240	2.85	2A	High	No	Yes	Yes	G2	N0	No	Yes	moderate jaundice	0	1	4	Head	453.1
ZCPA190760T	1	135	1.9	2B	High	No	No	Yes	G3	N1	Yes	Yes	no	2	1	3	Head	89.77
ZCPA190761T	1	126	1.425	2B	Low	Yes	No	No	G2	N1	No	No	no	2	2	4	Head	1000
ZCPA190762T	1	375	1.425	2B	Low	No	No	No	G2	N1	Yes	No	no	0	2	3	Body and tail	326
ZCPA190763T	1	920	0.95	1B	Low	No	Yes	No	G1	N0	No	No	no	3	2	4	Body	199.7
ZCPA190764T	1	261	1.425	1B	Low	No	Yes	No	G3	N0	No	No	no	0	1	4	Head	422.1
ZCPA190765T	1	390	2.375	4A	High	No	Yes	Yes	G3	N0	No	Yes	no	0	2	4	Body and tail	41.09
ZCPA190766T	0	315	2.375	2A	High	No	No	Yes	G2	N1	No	Yes	no	0	2	6	Body and tail	29.63
ZCPA190767T	1	378	0.9	2A	Low	No	No	No	G1	N0	No	No	no	2	2	2	Body and tail	32
ZCPA190768T	1	300	2.85	4A	High	Yes	Yes	Yes	G2	N1	Yes	Yes	no	0	2	4	Head	36.7
ZCPA190769T	0	273	0.95	1B	Low	Yes	No	No	G2	N0	Yes	No	no	3	2	4	Body	82.62
ZCPA190770T	1	717	0.95	2A	Low	No	No	No	G1	N0	Yes	No	no	0	2	5	Head	194
ZCPA190771T	1	195	0.95	2A	Low	No	Yes	No	G1	N0	No	No	moderate jaundice	3	2	5	Head	212
ZCPA190772T	1	375	1.425	1B	Low	No	No	No	G2	N0	Yes	No	no	0	1	4	Head	1000
ZCPA190773T	1	390	0.4875	2B	Low	Yes	No	No	G2	N1	Yes	No	mild jaundice	2	2	4	Head	1000
ZCPA190774T	0	420	2.375	2B	High	No	No	Yes	G1	N1	Yes	Yes	severe jaundice	0	2	8	Head	477
ZCPA190775T	1	360	2.85	3B	High	No	No	Yes	G3	N0	Yes	Yes	no	0	1	6	Body and tail	76.51
ZCPA190776T	1	276	1.425	1B	Low	No	No	No	G3	N0	No	No	no	1	2	4	Body and tail	11.58
ZCPA190777T	1	174	0.9	2A	Low	No	No	No	G1	N0	No	No	no	0	1	9	Body and tail	21.89
ZCPA190778T	1	135	1.425	2B	Low	No	No	No	G2	N1	Yes	No	moderate jaundice	0	1	6	Head	1000
ZCPA190779T	1	360	1.425	1B	Low	No	No	No	G2	N0	Yes	No	no	0	1	3	Body and tail	34
ZCPA190780T	1	897	0.45	2A	Low	No	No	No	G2	N0	Yes	No	no	0	1	6	Head	567
ZCPA190781T	1	219	0.95	1A	Low	Yes	No	No	G1	N0	No	No	no	0	2	5	Body and tail	12.78
ZCPA190782T	1	567	1.9	3A	High	No	No	Yes	G3	N0	No	Yes	no	1	2	5	Body and tail	64.92
ZCPA190786T	1	1046	0.375	2B	Low	No	Yes	No	G2	N1	Yes	No	moderate jaundice	0	2	5	Head	156
ZCPA190789T	0	126	2.375	2A	High	Yes	Yes	Yes	G3	N0	No	Yes	moderate jaundice	0	2	4	Head	144.3
ZCPA190792T	0	411	1.425	2B	Low	Yes	No	No	G2	N1	Yes	No	moderate jaundice	2	2	3	Head	123
ZCPA190794T	0	684	1.425	2B	Low	No	No	No	G2	N1	Yes	No	no	0	1	5	Head	381
ZCPA190796T	1	225	1.425	2A	Low	No	No	No	G2	N0	Yes	Yes	no	0	2	4	Body and tail	178.8
ZCPA190797T	0	555	1.425	2B	Low	No	No	No	G2	N1	No	Yes	no	2	2	2	Head	107
ZCPA190799T	0	522	0.95	2A	Low	No	No	No	G2	N0	Yes	No	no	1	2	5	Body and tail	217
ZCPA190800T	0	372	0.6	2B	Low	No	Yes	No	G3	N0	No	No	no	2	2	8	Body	1000
ZCPA190801T	0	396	2.375	2B	High	Yes	No	Yes	G2	N1	No	Yes	no	0	2	5	Body and tail	305.8
ZCPA190805T	1	870	0.9	2B	Low	Yes	No	No	G1	N1	No	No	no	1	1	7	Body and tail	198
